# Supplementary material for: Asymmetric Allylation Catalyzed by Chiral Phosphoric Acids: Stereoselective Synthesis of Tertiary Alcohols and a Reagent‐Based Switch in Stereopreference
Source: PubMed Central journal article supplement (PMC8359974; doi:10.1002/adsc.202100037), 2021-05-05
Supplement: ADSC-363-3138-s001.pdf [file ADSC-363-3138-s001.pdf]

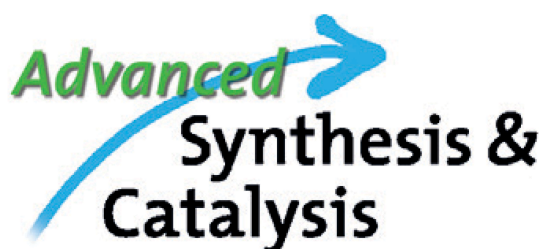

## Supporting Information

### **Asymmetric Allylation Catalyzed by Chiral Phosphoric Acids: Stereoselective Synthesis of Tertiary Alcohols and a Reagent- Based Switch in Stereopreference**

Mattia Lazzarotto,<sup>+</sup> Peter Hartmann,<sup>+</sup> Jakob Pletz, Ferdinand Belaj, Wolfgang Kroutil, Stefan E. Payer, and Michael Fuchs\*  
© 2021 The Authors. *Advanced Synthesis & Catalysis* published by Wiley-VCH GmbH. This is an open access article under the terms of the Creative Commons Attribution License, which permits use, distribution and reproduction in any medium, provided the original work is properly cited.

## Supporting Information -

### **Asymmetric Allylation Catalysed by Chiral Phosphoric Acids: Stereoselective Synthesis of Tertiary Alcohols and a Reagent- Based Switch in Stereopreference**

Mattia Lazzarotto,<sup>a),⊥</sup> Peter Hartmann,<sup>a),⊥</sup> Jakob Pletz,<sup>a)</sup> Ferdinand Belaj,<sup>b)</sup> Wolfgang Kroutil,<sup>a)</sup> Stefan E. Payer,<sup>a)</sup> Michael Fuchs<sup>a),\*</sup>

<sup>a)</sup> University of Graz, Institute of Chemistry, Bioorganic and Organic Chemistry, Heinrichstrasse 28/II, 8010 Graz, Austria, Europe.

<sup>b)</sup> University of Graz, Institute of Chemistry, Inorganic Chemistry, Schubertstraße 1/III, 8010 Graz, Austria, Europe.

## Table of contents

|                                                                                               |     |
|-----------------------------------------------------------------------------------------------|-----|
| Table of contents .....                                                                       | S2  |
| General Information.....                                                                      | S6  |
| Instrumentation .....                                                                         | S6  |
| Experimentals. ....                                                                           | S7  |
| Benzyl acrylate ( <b>SI01</b> ). ....                                                         | S7  |
| Benzyl 2-(bromomethyl)acrylate ( <b>7c</b> ).....                                             | S7  |
| Benzhydryl acrylate ( <b>SI02</b> ).....                                                      | S7  |
| Benzhydryl 2-(hydroxymethyl)acrylate ( <b>SI03</b> ). ....                                    | S7  |
| Benzhydryl 2-(bromomethyl)acrylate ( <b>7d</b> ). ....                                        | S8  |
| Benzhydryl 3-hydroxy-2-methylenebutanoate ( <b>SI04</b> ). ....                               | S8  |
| Benzhydryl (Z)-2-(bromomethyl)but-2-enoate ( <b>7e</b> ).....                                 | S8  |
| Synthesis of substituted acrylamides.....                                                     | S9  |
| <i>N,N</i> -diethylacrylamide ( <b>SI5</b> ). ....                                            | S9  |
| <i>N,N</i> -dibenzylacrylamide ( <b>SI6</b> ). ....                                           | S9  |
| Baylis-Hillman reaction of substituted acrylamides .....                                      | S9  |
| <i>N,N</i> -diethyl-2-(hydroxymethyl)acrylamide ( <b>SI7</b> ).....                           | S9  |
| <i>N,N</i> -dibenzyl-2-(hydroxymethyl)acrylamide ( <b>SI8</b> ). ....                         | S10 |
| <i>N,N</i> -diethyl-2-(bromomethyl)acrylamide ( <b>SI9</b> ).....                             | S10 |
| <i>N,N</i> -dibenzyl-2-(bromomethyl)acrylamide ( <b>7f</b> ). ....                            | S10 |
| General procedure for the asymmetric allylation of ketones (Procedure A). ....                | S11 |
| 1-Phenylbut-3-en-1-ol ( <b>8a</b> ).....                                                      | S11 |
| 3-Methylene-5-phenyldihydrofuran-2(3 <i>H</i> )-one ( <b>10a</b> ). ....                      | S11 |
| 5-Methyl-3-methylene-5-phenyldihydrofuran-2(3 <i>H</i> )-one ( <b>10b</b> ). ....             | S11 |
| Benzyl 4-hydroxy-2-methylene-4-phenylpentanoate ( <b>8d</b> ). ....                           | S12 |
| General procedure for the preparation of racemic reference material (Procedure B).....        | S12 |
| General procedure for the asymmetric allylation of ketones (Procedure C). ....                | S12 |
| Benzhydryl 4-hydroxy-2-methylene-4-phenylpentanoate ( <b>8e</b> ). ....                       | S12 |
| Benzhydryl 4-(4-bromophenyl)-4-hydroxy-2-methylenepentanoate ( <b>8f</b> ).....               | S13 |
| Benzhydryl 4-hydroxy-2-methylene-4-[4-(trifluoromethyl)phenyl]pentanoate ( <b>8g</b> ). ....  | S13 |
| Benzhydryl 4-hydroxy-4-(4-methoxyphenyl)-2-methylenepentanoate ( <b>8h</b> ). ....            | S13 |
| Benzhydryl 4-hydroxy-4-(3-methoxyphenyl)-2-methylenepentanoate ( <b>8i</b> ).....             | S14 |
| Benzhydryl 4-hydroxy-4-(2-methoxyphenyl)-2-methylenepentanoate ( <b>8j</b> ).....             | S14 |
| Benzhydryl 4-hydroxy-2-methylene-4-phenylhexanoate ( <b>8k</b> ). ....                        | S14 |
| Benzhydryl 4-hydroxy-2-methylene-4-phenylheptanoate ( <b>8l</b> ). ....                       | S15 |
| Benzhydryl 2-[(1-hydroxy-1,2,3,4-tetrahydronaphthalen-1-yl)methyl]acrylate ( <b>8m</b> )..... | S15 |
| Benzhydryl 2-[(4-hydroxychroman-4-yl)methyl]acrylate ( <b>8n</b> ). ....                      | S15 |

|                                                                                                                                                              |     |
|--------------------------------------------------------------------------------------------------------------------------------------------------------------|-----|
| Benzhydryl 2-[(6-chloro-4-hydroxychroman-4-yl)methyl]acrylate ( <b>8o</b> ).....                                                                             | S16 |
| Benzhydryl ( <i>E</i> )-4-hydroxy-4-methyl-2-methylene-6-phenylhex-5-enoate ( <b>8p</b> ). ....                                                              | S16 |
| Benzhydryl 4-(4-bromophenyl)-4-hydroxy-3-methyl-2-methylenepentanoate ( <b>8q</b> ). ....                                                                    | S16 |
| General procedure for the asymmetric allylation of ketones with amide reagents <b>SI9</b> and <b>SI10</b> (Procedure D). ....                                | S17 |
| <i>N,N</i> -dibenzyl-4-hydroxy-2-methylene-4-phenylpentanamide ( <b>8r</b> ).....                                                                            | S17 |
| <i>N,N</i> -diethyl-4-hydroxy-2-methylene-4-phenylpentanamide ( <b>SI12</b> ).....                                                                           | S17 |
| Determination of absolute configuration and diastereoselectivity .....                                                                                       | S17 |
| ( <i>S</i> )-5-Methyl-3-methylene-5-phenyldihydrofuran-2(3 <i>H</i> )-one ( <b>10b</b> ). ....                                                               | S17 |
| Preparation of ( <i>R</i> )-6-chloro-4'-methylene-3',4'-dihydro-5'H-spiro[chromane-4,2'-furan]-5'-one ( <b>10o</b> ) with DMAP. ....                         | S18 |
| Preparation of <i>rac</i> -6-chloro-4'-methylene-3',4'-dihydro-5'H-spiro[chromane-4,2'-furan]-5'-one ( <b>10o</b> ) with <i>p</i> TSA. ....                  | S18 |
| Crystallization of <b>10o</b> .....                                                                                                                          | S18 |
| 5-(4-bromophenyl)-4,5-dimethyl-3-methylenedihydrofuran-2(3 <i>H</i> )-one ( <b>10q</b> ). ....                                                               | S19 |
| Investigations of the origin of the switch and the responsible structural motif.....                                                                         | S19 |
| General procedure for the asymmetric allylation of ketones with the lactone based organozinc reagent.....                                                    | S19 |
| 4-[(4-bromophenyl)(hydroxy)methyl]-3-methylenedihydrofuran-2(3 <i>H</i> )-one ( <b>19</b> ). ....                                                            | S20 |
| 4-[1-(4-bromophenyl)-1-hydroxyethyl]-3-methylenedihydrofuran-2(3 <i>H</i> )-one ( <b>20</b> ). ....                                                          | S20 |
| CD spectra of compounds <b>19</b> and <b>20</b> .....                                                                                                        | S21 |
| Crystal Structure Determination of <b>10o</b> . ....                                                                                                         | S21 |
| <i>rac</i> - <b>10o</b> -Cry1.....                                                                                                                           | S21 |
| <i>rac</i> - <b>10o</b> -Cry2.....                                                                                                                           | S27 |
| ( <i>R</i> )- <b>10o</b> .....                                                                                                                               | S33 |
| NMR data .....                                                                                                                                               | S39 |
| Benzyl acrylate ( <b>SI01</b> ) in CDCl <sub>3</sub> @ 300.13 MHz ( <sup>1</sup> H) and 75.47 MHz ( <sup>13</sup> C). ....                                   | S40 |
| Benzhydryl 2-(hydroxymethyl)acrylate ( <b>SI03</b> ) in CDCl <sub>3</sub> @ 300.13 MHz ( <sup>1</sup> H) and 75.47 MHz ( <sup>13</sup> C). ....              | S41 |
| Benzhydryl 2-(bromomethyl)acrylate ( <b>7d</b> ) in CDCl <sub>3</sub> @ 300.13 MHz ( <sup>1</sup> H) and 75.47 MHz ( <sup>13</sup> C). ....                  | S42 |
| Benzhydryl 3-hydroxy-2-methylenebutanoate ( <b>SI04</b> ) in CDCl <sub>3</sub> @ 300.13 MHz ( <sup>1</sup> H) and 75.47 MHz ( <sup>13</sup> C). ....         | S43 |
| Benzhydryl ( <i>Z</i> )-2-(bromomethyl)but-2-enoate ( <b>7e</b> ) in CDCl <sub>3</sub> @ 300.13 MHz ( <sup>1</sup> H) and 75.47 MHz ( <sup>13</sup> C). .... | S44 |
| <i>N,N</i> -diethyl-2-(hydroxymethyl)acrylamide ( <b>SI7</b> ).....                                                                                          | S46 |
| <i>N,N</i> -dibenzyl-2-(hydroxymethyl)acrylamide ( <b>SI8</b> ). ....                                                                                        | S47 |
| <i>N,N</i> -diethyl-2-(bromomethyl)acrylamide ( <b>SI9</b> ).....                                                                                            | S48 |
| <i>N,N</i> -dibenzyl-2-(bromomethyl)acrylamide ( <b>7f</b> ). ....                                                                                           | S49 |

|                                                                                                                                                                                                                    |     |
|--------------------------------------------------------------------------------------------------------------------------------------------------------------------------------------------------------------------|-----|
| 1-Phenylbut-3-en-1-ol ( <b>8a</b> ) in CDCl <sub>3</sub> @ 300.13 MHz ( <sup>1</sup> H) and 75. 47 MHz ( <sup>13</sup> C). .....                                                                                   | S50 |
| 3-Methylene-5-phenyldihydrofuran-2(3 <i>H</i> )-one ( <b>10a</b> ) in CDCl <sub>3</sub> @ 300.13 MHz ( <sup>1</sup> H) and 75. 47 MHz ( <sup>13</sup> C). .....                                                    | S51 |
| 5-Methyl-3-methylene-5-phenyldihydrofuran-2(3 <i>H</i> )-one ( <b>10b</b> ) in CDCl <sub>3</sub> @ 300.13 MHz ( <sup>1</sup> H) and 75. 47 MHz ( <sup>13</sup> C). .....                                           | S52 |
| Benzhydryl 4-hydroxy-2-methylene-4-phenylpentanoate ( <b>8e</b> ) in CDCl <sub>3</sub> @ 300.13 MHz ( <sup>1</sup> H) and 75. 47 MHz ( <sup>13</sup> C). .....                                                     | S53 |
| Benzhydryl 4-(4-bromophenyl)-4-hydroxy-2-methylenepentanoate ( <b>8f</b> ) in CDCl <sub>3</sub> @ 300.13 MHz ( <sup>1</sup> H) and 75. 47 MHz ( <sup>13</sup> C). .....                                            | S54 |
| Benzhydryl 4-hydroxy-2-methylene-4-[4-(trifluoromethyl)phenyl]pentanoate ( <b>8g</b> ) in CDCl <sub>3</sub> @ 300.13 MHz ( <sup>1</sup> H), 282.39 MHz ( <sup>19</sup> F) and 75. 47 MHz ( <sup>13</sup> C). ..... | S55 |
| Benzhydryl 4-hydroxy-4-(4-methoxyphenyl)-2-methylenepentanoate ( <b>8h</b> ) in CDCl <sub>3</sub> @ 300.13 MHz ( <sup>1</sup> H) and 75. 47 MHz ( <sup>13</sup> C). .....                                          | S57 |
| Benzhydryl 4-hydroxy-4-(3-methoxyphenyl)-2-methylenepentanoate ( <b>8i</b> ) in CDCl <sub>3</sub> @ 300.13 MHz ( <sup>1</sup> H) and 75. 47 MHz ( <sup>13</sup> C). .....                                          | S58 |
| Benzhydryl 4-hydroxy-4-(2-methoxyphenyl)-2-methylenepentanoate ( <b>8j</b> ) in CDCl <sub>3</sub> @ 300.13 MHz ( <sup>1</sup> H) and 75. 47 MHz ( <sup>13</sup> C). .....                                          | S59 |
| Benzhydryl 4-hydroxy-2-methylene-4-phenylhexanoate ( <b>8k</b> ) in CDCl <sub>3</sub> @ 300.13 MHz ( <sup>1</sup> H) and 75. 47 MHz ( <sup>13</sup> C). .....                                                      | S60 |
| Benzhydryl 4-hydroxy-2-methylene-4-phenylheptanoate ( <b>8l</b> ) in CDCl <sub>3</sub> @ 300.13 MHz ( <sup>1</sup> H) and 75. 47 MHz ( <sup>13</sup> C). .....                                                     | S61 |
| Benzhydryl 2-[(1-hydroxy-1,2,3,4-tetrahydronaphthalen-1-yl)methyl]acrylate ( <b>8m</b> ) in CDCl <sub>3</sub> @ 300.13 MHz ( <sup>1</sup> H) and 75. 47 MHz ( <sup>13</sup> C). .....                              | S62 |
| Benzhydryl 2-[(4-hydroxychroman-4-yl)methyl]acrylate ( <b>8n</b> ) in CDCl <sub>3</sub> @ 300.13 MHz ( <sup>1</sup> H) and 75. 47 MHz ( <sup>13</sup> C). .....                                                    | S63 |
| Benzhydryl 2-[(6-chloro-4-hydroxychroman-4-yl)methyl]acrylate ( <b>8o</b> ) in CDCl <sub>3</sub> @ 300.13 MHz ( <sup>1</sup> H) and 75. 47 MHz ( <sup>13</sup> C). .....                                           | S64 |
| Benzhydryl ( <i>E</i> )-4-hydroxy-4-methyl-2-methylene-6-phenylhex-5-enoate ( <b>8p</b> ) in CDCl <sub>3</sub> @ 300.13 MHz ( <sup>1</sup> H) and 75. 47 MHz ( <sup>13</sup> C). .....                             | S65 |
| Benzhydryl 4-(4-bromophenyl)-4-hydroxy-3-methyl-2-methylenepentanoate ( <b>8q</b> ) in CDCl <sub>3</sub> @ 300.13 MHz ( <sup>1</sup> H) and 75. 47 MHz ( <sup>13</sup> C). .....                                   | S66 |
| ( <i>R</i> )-6-chloro-4'-methylene-3',4'-dihydro-5'H-spiro[chromane-4,2'-furan]-5'-one ( <b>10o</b> ) in CDCl <sub>3</sub> @ 300.13 MHz ( <sup>1</sup> H) and 75. 47 MHz ( <sup>13</sup> C). .....                 | S67 |
| 5-(4-bromophenyl)-4,5-dimethyl-3-methylenedihydrofuran-2(3 <i>H</i> )-one ( <b>10q</b> ) in CDCl <sub>3</sub> @ 300.13 MHz ( <sup>1</sup> H) and 75. 47 MHz ( <sup>13</sup> C). .....                              | S68 |
| 4-[(4-bromophenyl)(hydroxy)methyl]-3-methylenedihydrofuran-2(3 <i>H</i> )-one ( <b>19</b> ) in CDCl <sub>3</sub> @ 300.13 MHz ( <sup>1</sup> H) and 75. 47 MHz ( <sup>13</sup> C). .....                           | S70 |
| 4-[1-(4-bromophenyl)-1-hydroxyethyl]-3-methylenedihydrofuran-2(3 <i>H</i> )-one ( <b>20</b> ) in CDCl <sub>3</sub> @ 300.13 MHz ( <sup>1</sup> H) and 75. 47 MHz ( <sup>13</sup> C). .....                         | S71 |
| HPLC chromatograms.....                                                                                                                                                                                            | S73 |
| Benzhydryl 4-hydroxy-2-methylene-4-phenylpentanoate ( <b>8e</b> ). .....                                                                                                                                           | S74 |
| Benzhydryl 4-(4-bromophenyl)-4-hydroxy-2-methylenepentanoate ( <b>8f</b> ).....                                                                                                                                    | S75 |

|                                                                                                     |     |
|-----------------------------------------------------------------------------------------------------|-----|
| Benzhydryl 4-hydroxy-2-methylene-4-[4-(trifluoromethyl)phenyl]pentanoate ( <b>8g</b> ).....         | S76 |
| Benzhydryl 4-hydroxy-4-(4-methoxyphenyl)-2-methylenepentanoate ( <b>8h</b> ). .....                 | S77 |
| Benzhydryl 4-hydroxy-4-(3-methoxyphenyl)-2-methylenepentanoate ( <b>8i</b> ).....                   | S78 |
| Benzhydryl 4-hydroxy-4-(2-methoxyphenyl)-2-methylenepentanoate ( <b>8j</b> ).....                   | S79 |
| Benzhydryl 4-hydroxy-2-methylene-4-phenylhexanoate ( <b>8k</b> ). .....                             | S80 |
| Benzhydryl 4-hydroxy-2-methylene-4-phenylheptanoate ( <b>8l</b> ). .....                            | S81 |
| Benzhydryl 2-[(1-hydroxy-1,2,3,4-tetrahydronaphthalen-1-yl)methyl]acrylate ( <b>8m</b> ).....       | S82 |
| Benzhydryl 2-[(4-hydroxychroman-4-yl)methyl]acrylate ( <b>8n</b> ). .....                           | S83 |
| Benzhydryl 2-[(6-chloro-4-hydroxychroman-4-yl)methyl]acrylate ( <b>8o</b> ).....                    | S84 |
| Benzhydryl ( <i>E</i> )-4-hydroxy-4-methyl-2-methylene-6-phenylhex-5-enoate ( <b>8p</b> ). .....    | S85 |
| Benzhydryl 4-(4-bromophenyl)-4-hydroxy-3-methyl-2-methylenepentanoate ( <b>8q</b> ). .....          | S86 |
| Determination of Absolute Configuration. ....                                                       | S87 |
| 5-Methyl-3-methylene-5-phenyldihydrofuran-2(3H)-one ( <b>10b</b> ).....                             | S87 |
| (R)-6-chloro-4'-methylene-3',4'-dihydro-5'H-spiro[chromane-4,2'-furan]-5'-one ( <b>10o</b> ). ..... | S88 |
| HPLC chromatograms of single crystals from X-Ray Analysis. ....                                     | S89 |
| 5-(4-bromophenyl)-4,5-dimethyl-3-methylenedihydrofuran-2(3H)-one ( <b>10q</b> ). .....              | S91 |
| 4-[(4-bromophenyl)(hydroxy)methyl]-3-methylenedihydrofuran-2(3H)-one ( <b>19</b> ). .....           | S92 |
| 4-[1-(4-bromophenyl)-1-hydroxyethyl]-3-methylenedihydrofuran-2(3H)-one ( <b>20</b> ). .....         | S93 |
| References. ....                                                                                    | S95 |

## General Information.

All chemicals were purchased from Sigma Aldrich or Acros Organics and were used as received, unless otherwise noted. All solvents were purchased from Roth, except Dioxane (Alfa Aasar) and dry toluene (Sigma Aldrich). Moisture sensitive reactions were performed using standard Schlenk techniques with argon 5.0.

Analytical thin layer chromatography (TLC) was carried out on Merck TLC silica gel aluminum sheets (silica gel 60, F<sub>254</sub>, 20 x 20 cm) and spots were visualized by UV light ( $\lambda = 254$  nm) and by staining with cerium ammonium molybdate solution (50 g (NH<sub>4</sub>)<sub>6</sub>Mo<sub>7</sub>O<sub>24</sub> were dissolved in 400 mL H<sub>2</sub>O and 50 mL conc. H<sub>2</sub>SO<sub>4</sub> was added followed by 2.0 g Ce(SO<sub>4</sub>)<sub>2</sub>) or KMnO<sub>4</sub> solution (1 g KMnO<sub>4</sub> and 2 g Na<sub>2</sub>CO<sub>3</sub> were dissolved in 100 mL H<sub>2</sub>O) and developed by heating with a heat gun.

Column chromatography was performed on silica gel 60 from Merck with particle sizes 40-63  $\mu$ m. A 30- to 100-fold excess of silica gel was used with respect to the mass of dry crude product, depending on the separation problem. For sticky crude products, the crude material was dissolved in MeOH and subsequently adsorbed on the 2.5-fold excess of silica gel. Afterwards the solvent was removed in vacuum and the adsorbed crude material was dried in oil pump vacuum. The dimension of the column was adjusted to the required amount of silica gel and formed a pad between 20 and 40 cm of height. In general, the silica gel was mixed with the eluent and charged into the column before equilibration. Subsequently, the dissolved or adsorbed crude material was loaded onto the top of the silica gel and the mobile phase was forced through the column by pressure exerted by a rubber bulb pump.

### Instrumentation

<sup>1</sup>H-, <sup>13</sup>C-, <sup>31</sup>P- and <sup>11</sup>B-NMR spectra were recorded on a Bruker AVANCE III 300 spectrometer (<sup>1</sup>H: 300.13 MHz; <sup>13</sup>C: 75.47 MHz; <sup>31</sup>P: 121.49 MHz; <sup>11</sup>B: 96.29) with autosampler. Chemical shifts were referenced to the residual proton and carbon signal of the deuterated solvent [CDCl<sub>3</sub>:  $\delta = 7.26$  ppm (<sup>1</sup>H), 77.16 ppm (<sup>13</sup>C)]. Chemical shifts  $\delta$  are given in ppm (parts per million) and coupling constants *J* in Hz (Hertz). Deuterated solvents for nuclear resonance spectroscopy were purchased from Roth.

Melting points were determined on a Gallenkamp MPD350.BM2.5 apparatus with an integrated microscopical support. They were measured in open capillary tubes with a mercury-in-glass thermometer and were not corrected.

IR-spectra were recorded neat on a Bruker Alpha-P (ATR) instrument.

The specific optical rotation was determined on a Perkin Elmer Polarimeter 341 with an integrated sodium vapor lamp. All samples were measured in CHCl<sub>3</sub> and CH<sub>2</sub>Cl<sub>2</sub> (both were purchased from Sigma Aldrich, ACS specrophotometric grade,  $\geq 99.8\%$ ) at the D-line of the sodium light ( $\lambda = 589$  nm) under non-tempered conditions between 22 °C and 27 °C.

High resolution mass spectra were recorded on an Agilent 6230 TOF LC/MS using ESI (positive mode, capillary voltage 3.5 kV) or APCI (negative mode, 5.0 kV) methods.

Chiral HPLC analysis was performed on a Shimadzu HPLC system [DGu-20A (degasser), LC-20A (pump), SIL-20A (autosampler), CTO-20AC (column oven), SPD-M20A (detector), CBM-20AC (controller)] with *n*-heptane/2-PrOH as eluent using a Daicel columns [dimension: 4.6 x 250 mm, 5  $\mu$ m particle size, except Chiralpak AD (10  $\mu$ m) and Chiralcel OJ (10  $\mu$ m)] and conditions as specified below.

## Experimentals.

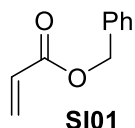

### Benzyl acrylate (SI01).

Acrylic acid (2.16 g, 30.0 mmol, 1 eq.) was dissolved in DMF (20 mL) and cooled to 0 °C with an ice bath. K<sub>2</sub>CO<sub>3</sub> (4.15 g, 30.0 mmol, 1 eq.) was added portionwise over 5 min and the mixture was stirred for 20 min. The ice bath was removed and benzyl bromide (5.13 g, 30.0 mmol, 3.56 mL, 1 eq.) was added and the mixture was heated to 85 °C (oil bath temperature) and kept at that temperature for 16 h. The obtained slurry was cooled to room temperature and the reaction was quenched by water (ca. 20 mL). The mixture was extracted with hexanes (3 x 40 mL) and the combined organic phase was washed with saturated aqueous NH<sub>4</sub>Cl solution, dried over Na<sub>2</sub>SO<sub>4</sub>, filtered and concentrated. The remaining crude product was purified via flash chromatography (silica gel, hexanes/EtOAc 10/1) to give the product as a clear oil (2.78 g, 17.0 mmol, 57%).

<sup>1</sup>H-NMR (300.13 MHz, CDCl<sub>3</sub>): 7.42-7.31 (m, 5H), 6.47 (dd, *J*<sub>1</sub> = 17.3, *J*<sub>2</sub> = 1.5, 1H), 6.19 (dd, *J*<sub>1</sub> = 17.3, *J*<sub>2</sub> = 10.4, 1H), 5.86 (dd, *J*<sub>1</sub> = 10.4, *J*<sub>2</sub> = 1.5, 1H), 5.22 (s, 2H); <sup>13</sup>C-NMR (75.47 MHz, CDCl<sub>3</sub>): 166.1, 135.9, 131.2, 128.7, 128.4, 128.34, 128.32, 66.4; IR (film)  $\tilde{\nu}$  = 3067, 3035, 2954, 2893, 1720, 1634, 1619, 1498, 1455, 1406, 1372, 1296, 1267, 1172, 1048, 982, 966, 808, 735, 695 cm<sup>-1</sup>; HRMS: no molecular ion peak could be detected due to the poor ionisation of compound **SI01**.

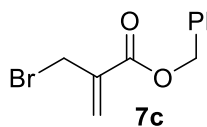

### Benzyl 2-(bromomethyl)acrylate (7c).

**7c** was prepared according to a literature procedure in 77% overall yield over two steps from benzyl acrylate (**SI01**) on a 1.5 g scale (referring to the final product).<sup>1</sup>

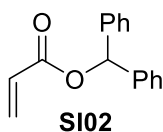

### Benzhydryl acrylate (SI02).

Acrylic acid (1.13 g, 15.7 mmol, 1 eq.) was dissolved in DMF (15 mL) and cooled to 0 °C. K<sub>2</sub>CO<sub>3</sub> (2.17 g, 15.7 mmol, 1 eq.) was added over a period of 5 min, the ice bath was removed and a solution of bromodiphenylmethane (3.88 g, 15.7 mmol, 1 eq.) in DMF (5 mL) was added slowly. The mixture was heated to 80 °C (oil bath temperature) and kept at that temperature for 16 h. The obtained slurry was cooled to room temperature and the reaction was quenched by the addition of water (ca. 20 mL). The mixture was extracted with EtOAc (3 x 40 mL) and the combined organic phase was washed with saturated aqueous NH<sub>4</sub>Cl solution, dried over Na<sub>2</sub>SO<sub>4</sub>, filtered and concentrated. The remaining crude product was purified via flash chromatography (silica gel, hexanes/EtOAc 15/1) to give the product including an inseparable impurity of the bromodiphenylmethane as a clear oil. This mixture was used for the subsequent synthesis of **SI03** without further purification.

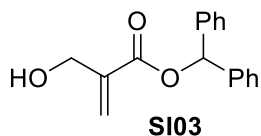

### Benzhydryl 2-(hydroxymethyl)acrylate (SI03).

The mixture of **SI02** and the impurity from the previous experiment (*vide supra*) was dissolved in dioxane/water 1/1 (100 mL). Formaldehyde (5.7 mL, 30% aqueous solution, 157 mmol, 10 eq.) and 1,4-diazabicyclo[2.2.2]octane (DABCO, 1.76 g, 15.7 mmol, 1 eq.) were added and the mixture was stirred at room temperature for 28 h. The reaction was quenched by the addition of water (ca. 20 mL), extracted with EtOAc (3 x 40 mL) and the combined organic phase was dried over Na<sub>2</sub>SO<sub>4</sub>, filtered and concentrated. The obtained crude product was purified via flash chromatography (silica gel, hexanes/EtOAc 4/1) to give **SI03** as a clear oil (2.13 g, 7.90 mmol, 50% over two steps).

<sup>1</sup>H-NMR (300.13 MHz, CDCl<sub>3</sub>): 7.45 – 7.19 (m, 10H), 6.96 (s, 1H), 6.41 (s, 1H), 5.90 (s, 1H), 4.37 (d, *J* = 5.7 Hz, 2H), 2.31 (br s, 1H); <sup>13</sup>C-NMR (75.47 MHz, CDCl<sub>3</sub>): 165.4, 140.0, 139.6, 128.7, 128.2, 127.1, 126.4, 77.5, 62.6; IR (film)  $\tilde{\nu}$  = 3385 (br), 3085, 3059, 3027, 1713, 1656, 1597, 1493, 1446,



1270, 1172, 1154, 1031, 1017, 851, 752, 734, 695, 651, 600, 540  $\text{cm}^{-1}$ ; HRMS(APCI-negative):  $m/z$ : calc. for  $\text{C}_{17}\text{H}_{15}\text{O}_3^-$ : 267.1027 [M-H]<sup>-</sup>, found: 267.1029.

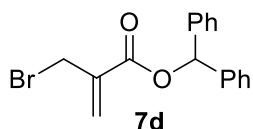

#### Benzhydryl 2-(bromomethyl)acrylate (**7d**).

Alcohol **SI04** (1.89 g, 7.00 mmol, 1 eq.) was dissolved in diethyl ether (10 mL) and the mixture was cooled to 0 °C.  $\text{PBr}_3$  (333  $\mu\text{L}$ , 949 mg, 3.50 mmol, 0.5 eq.) was added slowly via syringe and cannula and the mixture was stirred for 10 min at 0 °C and 3 h at room temperature. The reaction was cooled to 0 °C and quenched by the addition of cold water (10 mL). The obtained solution was extracted with EtOAc (3 x 10 mL), the combined organic phase was dried over  $\text{Na}_2\text{SO}_4$ , filtered and concentrated. The obtained crude product was via flash chromatography (silica gel, hexanes/EtOAc 10/1) to give the allylic bromide **7d** as a clear oil (1.88 g, 5.70 mmol, 81%).

$^1\text{H-NMR}$  (300.13 MHz,  $\text{CDCl}_3$ ): 7.43-7.28 (m, 10H), 6.99 (s, 1H), 6.48 (d,  $J = 0.6$ , 1H), 6.02 (d,  $J = 0.7$ , 1H), 4.24 (d,  $J = 0.8$ , 2H);  $^{13}\text{C-NMR}$  (75.47 MHz,  $\text{CDCl}_3$ ): 164.0, 140.0, 137.5, 130.0, 128.7, 128.2, 127.2, 78.1, 29.3; IR (film)  $\tilde{\nu} = 3088, 3063, 3031, 1720, 1495, 1453, 1398, 1323, 1301, 1220, 1168, 1112, 914, 807, 757, 742, 694, 627, 567 \text{ cm}^{-1}$ ; HRMS: no molecular ion peak could be detected due to the poor ionisation of compound **7d**.

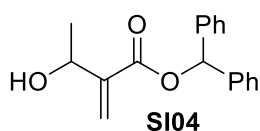

#### Benzhydryl 3-hydroxy-2-methylenebutanoate (**SI04**).

The crude acrylate **SI02** (1.50 g, 6.29 mmol, 1 eq.) was dissolved in dioxane/water 1/1 (42 mL). Acetaldehyde (1.06 mL, 833 mg, 18.9 mmol, 3 eq.) and 1,4-diazabicyclo[2.2.2]octane (DABCO, 705 mg, 6.29 mmol, 1 eq.) were added and the mixture was stirred at room temperature for 32 h. The reaction was quenched by the addition of water (ca. 15 mL), extracted with EtOAc (3 x 40 mL) and the combined organic phase was dried over  $\text{Na}_2\text{SO}_4$ , filtered and concentrated. The obtained crude product was purified via flash chromatography (silica gel, hexanes/EtOAc 5/1) to give the product as colorless oil (994 mg, 3.52 mmol, 56%).

$^1\text{H-NMR}$  (300.13 MHz,  $\text{CDCl}_3$ ): 7.38-7.28 (m, 10H), 6.97 (s, 1H), 6.40 (s, 1H), 5.91 (t,  $J = 1.0$ , 1H), 4.67 (q,  $J = 6.4$ , 1H), 2.61 (br s, 1H), 1.39 (d,  $J = 6.5$ , 3H);  $^{13}\text{C-NMR}$  (75.47 MHz,  $\text{CDCl}_3$ ): 165.7, 143.8, 140.1, 128.7, 128.2, 127.1, 124.8, 77.6 (overlapping with  $\text{CDCl}_3$  signal), 67.2, 22.1; IR (film)  $\tilde{\nu} = 3431$  (br), 3089, 3064, 3032, 2975, 2928, 1710, 1629, 1495, 1452, 1257, 1155, 1079, 958, 913, 816, 757, 742, 694, 601, 579  $\text{cm}^{-1}$ ; HRMS(ESI):  $m/z$ : calc. for  $\text{C}_{18}\text{H}_{18}\text{O}_3\text{Na}^+$ : 305.1148 [M+Na]<sup>+</sup>, found: 305.1148.

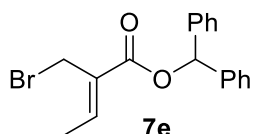

#### Benzhydryl (*Z*)-2-(bromomethyl)but-2-enoate (**7e**).

Alcohol **SI04** (617 mg, 2.19 mmol, 1 eq.) was dissolved in diethyl ether (3.5 mL) and the mixture was cooled to 0 °C.  $\text{PBr}_3$  (104  $\mu\text{L}$ , 296 mg, 1.09 mmol, 0.5 eq.) was added slowly via syringe and canula and the mixture was stirred for 10 min at 0 °C and 3 h at room temperature. The reaction was cooled to 0 °C and quenched by the addition of cold water (5 mL). The obtained mixture was extracted with EtOAc (3 x 10 mL), the combined organic phase was dried over  $\text{Na}_2\text{SO}_4$ , filtered and concentrated. The obtained crude product was via flash chromatography (silica gel, hexanes/EtOAc 10/1) to give the allylic bromide **7e** as a clear oil (391 mg, 1.13 mmol, 52%). The (*Z*)-geometry was confirmed via the correlations in a  $^1\text{H}, ^1\text{H}$ -NOESY spectrum (see NMR spectra for details).

$^1\text{H-NMR}$  (300.13 MHz,  $\text{CDCl}_3$ ): 7.33-7.18 (m, 10H), 7.13 (q,  $J = 7.3$ , 1H), 6.89 (s, 1H), 4.21 (s, 2H), 1.87 (d,  $J = 7.3$ , 3H);  $^{13}\text{C-NMR}$  (75.47 MHz,  $\text{CDCl}_3$ ): 164.6, 144.2, 140.3, 130.5, 128.7, 128.1, 127.2, 77.8, 24.1, 14.8; IR (film)  $\tilde{\nu} = 3088, 3063, 3031, 2939, 2850, 1715, 1643, 1495, 1452, 1382, 1353, 1262, 1216, 1159, 1124, 1045, 1030, 1002, 966, 759, 742, 696, 666, 597, 577 \text{ cm}^{-1}$ ; HRMS: no molecular ion peak could be detected due to the poor ionisation of compound **7e**.

### Synthesis of substituted acrylamides.

Acrylic acid (1.18 g, 16.5 mmol, 1 eq.) was dissolved in DCM (50 mL) and DMF was added (1.22 mL, 16.5 mmol, 1 eq.) and cooled to 0 °C. A 2 M solution of (COCl)<sub>2</sub> in DCM (8.25 mL, 16.5 mmol, 1 eq.) was added over a period of 5 min, the ice bath was removed and the reaction stirred at room temperature for 3 hours. Separately, a solution of diethylamine (853 μL, 8.25 mmol, 1 eq.) or dibenzylamine (1.59 mL, 8.25 mmol, 1 eq.) was prepared in 25 mL of DCM. Half of the acryloyl chloride solution was added slowly in the amine solution and the reaction stirred at room temperature overnight. The mixture was diluted with DCM (25 mL) and washed with saturated aqueous NaHCO<sub>3</sub> solution (10 mL) and brine (10 mL). The organic phase was dried over Na<sub>2</sub>SO<sub>4</sub>, filtered and concentrated. The remaining crude product was purified via flash chromatography.

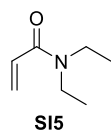

#### *N,N*-diethylacrylamide (SI5).

Flash chromatography (silica gel, from cyclohexane/EtOAc 3/1 to 2/1) gave the product including an inseparable impurity of the Micheal addition product as a clear oil. This mixture was used for the subsequent synthesis of **SI7** without further purification.

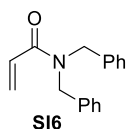

#### *N,N*-dibenzylacrylamide (SI6).

Flash chromatography (silica gel, from cyclohexane/EtOAc 6/1 to 3/1) gave the product including an inseparable impurity of the Micheal addition product as a clear yellowish oil. This mixture was used for the subsequent synthesis of **SI8** without further purification.

### Baylis-Hillman reaction of substituted acrylamides.

The mixture of **SI5** or **SI6** and the impurity from the previous experiment (*vide supra*) was dissolved in *tert*-Butyl alcohol (5 mL) in a biotage vial. Formaldehyde (5.7 mL, 37% aqueous solution, 70 mmol, 10 eq.) and 1,4-diazabicyclo[2.2.2]octane (DABCO, 794 mg, 7 mmol, 1 eq.) and phenol (165 mg, 1.75 mmol, 0.25 eq.) were added and the vial was sealed. The mixture was heated up to 80 °C and stirred for 3 days (in case of the *N,N*-dibenzylacrylamide) or 7 days (in case of the *N,N*-diethylacrylamide). The reaction was cooled down and the *tert*-Butyl alcohol was evaporated under vacuum. The resulting crude was diluted with water (ca. 7 mL), extracted with EtOAc (3 x 30 mL) and the combined organic phase was dried over Na<sub>2</sub>SO<sub>4</sub>, filtered and concentrated. The obtained crude product was purified via flash chromatography.

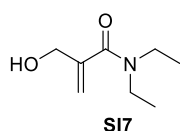

#### *N,N*-diethyl-2-(hydroxymethyl)acrylamide (SI7).

Flash chromatography (silica gel, from cyclohexane/EtOAc 1/1 to EtOAc) gave the product including an inseparable impurity as a clear oil (150 mg, 0.96 mmol, 11% over three steps). The compound was used for the subsequent synthesis of **SI9** without further purification.

<sup>1</sup>H NMR (300 MHz, Chloroform-*d*) δ 5.45 – 5.34 (m, 1H), 5.16 (m, 1H), 4.27 (dt, *J*<sub>1</sub> = 7.9, *J*<sub>2</sub> = 1.3 Hz, 2H), 3.80 (br s, 1H), 3.47 – 3.20 (m, 4H), 1.20 – 1.04 (m, 6H). <sup>13</sup>C NMR (75 MHz, CDCl<sub>3</sub>) δ 170.9, 144.7, 113.7, 63.8, 41.9, 40.1, 14.1, 13.0. IR (film)  $\tilde{\nu}$  = 3373 (br), 2973, 2936, 1601, 1480, 1458, 1434, 1380, 1363, 1316, 1291, 1250, 1218, 1132, 1098, 1061, 1039, 921, 791, 752, 732, 627, 567 cm<sup>-1</sup>; HRMS(ESI): *m/z*: calc. for C<sub>8</sub>H<sub>16</sub>NO<sub>2</sub><sup>+</sup>: 158.11785 [M+H]<sup>+</sup>, found: 158.117555.

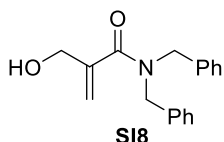

*N,N*-dibenzyl-2-(hydroxymethyl)acrylamide (**S18**).

Flash chromatography (silica gel, from cyclohexane/EtOAc 3/1 to 1/1) gave the as a clear colorless oil (929 mg, 3.3 mmol, 40% over three steps).

$^1\text{H}$  NMR (300 MHz, Chloroform-*d*)  $\delta$  7.50 – 7.10 (m, 10H), 5.46 (s, 1H), 5.30 (s, 1H), 4.59 (s, 4H), 4.39 (s, 2H), 3.10 (br s, 1H).  $^{13}\text{C}$  NMR (75 MHz,  $\text{CDCl}_3$ )  $\delta$  171.8, 143.7, 136.5, 129.2, 128.9, 128.3, 127.7, 127.1, 115.4, 64.4, 51.3, 46.8. IR (film)  $\tilde{\nu}$  = 3372, 3029, 2923, 1647, 1601, 1495, 1468, 1450, 1426, 1362, 1311, 1266, 1223, 1203, 1179, 1068, 1028, 919, 730, 696, 609, 555, 488, 456  $\text{cm}^{-1}$ ; HRMS(ESI): *m/z*: calc. for  $\text{C}_{18}\text{H}_{20}\text{NO}_2^+$ : 282.148855  $[\text{M}+\text{H}]^+$ , found: 282.14908.

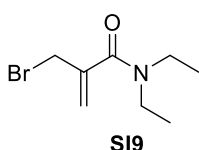

*N,N*-diethyl-2-(bromomethyl)acrylamide (**S19**).

Alcohol **S17** (100 mg, 0.64 mmol, 1 eq.) was dissolved in diethyl ether (5 mL) and the mixture was cooled to 0 °C.  $\text{PBr}_3$  (45  $\mu\text{L}$ , 129 mg, 0.48 mmol, 0.5 eq.) was added slowly via syringe and cannula and the mixture was stirred for 10 min at 0 °C and 3 h at room temperature. The reaction was cooled to 0 °C and quenched by the addition of cold water (5 mL). The obtained solution was extracted with EtOAc (3 x 30 mL), the combined organic phase was dried over  $\text{Na}_2\text{SO}_4$ , filtered and concentrated. The obtained crude product was via flash chromatography (silica gel, cyclohexane /EtOAc 3/1 to 2/1) to give the allylic bromide **S19** as a colourless oil (31 mg, 0.14 mmol, 22%).

$^1\text{H}$  NMR (300 MHz, Chloroform-*d*)  $\delta$  5.45 (s, 1H), 5.18 (s, 1H), 4.22 (d,  $J$  = 1.0 Hz, 2H), 3.47 (dd,  $J_1$  = 12.1,  $J_2$  = 6.6 Hz, 4H), 1.18 (t,  $J$  = 7.1 Hz, 6H).  $^{13}\text{C}$  NMR (75 MHz,  $\text{CDCl}_3$ )  $\delta$  169.0, 140.8, 116.8, 43.0, 39.1, 33.6, 14.5, 12.6; IR (film)  $\tilde{\nu}$  = 2972, 2935, 2875, 1639, 1612, 1475, 1459, 1433, 1381, 1318, 1242, 1213, 1142, 1104, 930, 777, 734, 629, 572, 519, 478  $\text{cm}^{-1}$ ; HRMS(ESI): *m/z*: calc. for  $\text{C}_8\text{H}_{15}\text{BrNO}^+$ : 220.033136  $[\text{M}+\text{H}]^+$ , found: 220.033153.

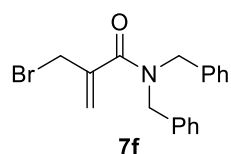

*N,N*-dibenzyl-2-(bromomethyl)acrylamide (**7f**).

Alcohol **S18** (929 mg, 3.30 mmol, 1 eq.) was dissolved in diethyl ether (6 mL) and the mixture was cooled to 0 °C.  $\text{PBr}_3$  (155  $\mu\text{L}$ , 447 mg, 1.65 mmol, 0.5 eq.) was added slowly via syringe and cannula and the mixture was stirred for 10 min at 0 °C and 3 h at room temperature. The reaction was cooled to 0 °C and quenched by the addition of cold water (5 mL). The obtained solution was extracted with EtOAc (3 x 30 mL), the combined organic phase was dried over  $\text{Na}_2\text{SO}_4$ , filtered and concentrated. The obtained crude product was via flash chromatography (silica gel, cyclohexane /EtOAc 3/1) to give the allylic bromide **7f** as a yellowish solid (291 mg, 0.85 mmol, 26%).

Mp: 59-61 °C (from  $\text{CDCl}_3$ );  $^1\text{H}$  NMR (300 MHz, Chloroform-*d*)  $\delta$  7.55 – 7.15 (m, 10H), 5.49 (d,  $J$  = 1.0 Hz, 1H), 5.31 (s, 1H), 4.82 – 4.50 (m, 4H), 4.36 (d,  $J$  = 0.9 Hz, 2H).  $^{13}\text{C}$  NMR (75 MHz,  $\text{CDCl}_3$ )  $\delta$  170.1, 139.9, 136.4, 129.0, 128.7, 128.3, 127.7, 127.6, 126.9, 117.7, 51.2, 47.1, 33.8. IR (film)  $\tilde{\nu}$  = 3059, 3027, 2955, 2927, 1645, 1619, 1603, 1495, 1473, 1450, 1433, 1420, 1398, 1363, 1353, 1315, 1210, 1169, 1026, 965, 963, 900, 741, 724, 693, 650, 569, 520, 458  $\text{cm}^{-1}$ ; HRMS(ESI): *m/z*: calc. for  $\text{C}_{18}\text{H}_{19}\text{BrNO}^+$ : 344.063994  $[\text{M}+\text{H}]^+$ , found: 344.064454.

### General procedure for the asymmetric allylation of ketones (Procedure A).

A 5 mL screw cap vial with magnetic stirring bar was charged with zinc (33.0 mg, 500  $\mu\text{mol}$ , 5 eq.), ammonium chloride (43.0 mg, 800  $\mu\text{mol}$ , 8 eq.) and (*S*)-3,3'-bis(2,4,6-triisopropylphenyl)-1,1'-binaphthyl-2,2'-diyl hydrogenphosphate (TRIP, 7.5 mg, 10.0  $\mu\text{mol}$ , 0.1 eq.) followed by the respective solvent mixture (see compounds below for details), the ketone (100  $\mu\text{mol}$ ) and the corresponding allyl bromide (150  $\mu\text{mol}$ , 1.5 eq.). The mixture was stirred (720 rpm) at room temperature for 16 h and was quenched consecutively by the addition of saturated aqueous  $\text{NH}_4\text{Cl}$  solution (5 mL). The mixture was extracted with EtOAc (3 x 10 mL) and the combined organic phase was dried over  $\text{Na}_2\text{SO}_4$ , filtered and concentrated under reduced pressure. The obtained crude product was purified via flash chromatography (silica gel, the respective eluents are indicated below) to give the pure product.

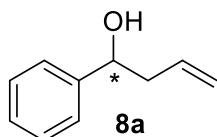

#### 1-Phenylbut-3-en-1-ol (**8a**).

Procedure A: Benzaldehyde, allyl bromide **7a**; solvent: toluene (1.0 mL); flash chromatography (silica gel, hexanes/EtOAc 5/1), yield: 14.0 mg, 95%, colorless oil;  $^1\text{H-NMR}$  (300.13 MHz,  $\text{CDCl}_3$ ): 7.37-7.24 (m, 5H), 5.87-5.73 (m, 1H), 5.19-5.11 (m, 2H), 4.72 (dd,  $J_1 = 7.3$ ,  $J_2 = 5.7$ , 1H), 2.53-2.47 (m, 2H), 2.14 (br s, 1H);  $^{13}\text{C-NMR}$  (75.47 MHz,  $\text{CDCl}_3$ ): 144.0, 134.6, 128.5, 127.7, 125.9, 118.5, 73.4, 43.9; IR (film)  $\tilde{\nu} = 3375$  (br), 1492, 1453, 1197, 1077, 1043, 1029, 913, 756, 698, 641, 608, 537  $\text{cm}^{-1}$ ; HPLC analysis on chiral stationary phase {Daicel Chiralcel OD-H, *n*-heptane/2-propanol 99/1, 0.8 mL/min, 25  $^\circ\text{C}$ , UV 215 nm,  $t_{\text{ret}}$ (enantiomer 1) = 19.7 min,  $t_{\text{ret}}$ (enantiomer 2) = 23.0 min}: only racemic material was obtained; analytical data is accordance with literature.<sup>2</sup>

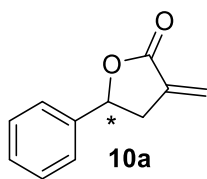

#### 3-Methylene-5-phenyldihydrofuran-2(3H)-one (**10a**).

Procedure A: Benzaldehyde, allyl bromide **7b**; solvent: toluene (1.0 mL); flash chromatography (silica gel, hexanes/EtOAc 5/1); yield: 14.6 mg, 84%, colorless oil;  $[\alpha]_{\text{D}}^{20} = +4.4$  ( $c = 1.9$ ,  $\text{CHCl}_3$ ); lit.:  $[\alpha]_{\text{D}}^{23} = +12.7$  ( $c = 1.0$ ,  $\text{CHCl}_3$ , (*S*)-enantiomer (77% ee));<sup>3</sup>  $[\alpha]_{\text{D}}^{20} = -2.0$  ( $c = 1.9$ ,  $\text{CH}_2\text{Cl}_2$ ); lit.:  $[\alpha]_{\text{D}}^{25} = -15.7$  [ $c = 1.3$ ,  $\text{CH}_2\text{Cl}_2$ , (*S*)-enantiomer (56% ee)];<sup>4</sup>  $^1\text{H-NMR}$  (300.13 MHz,  $\text{CDCl}_3$ ): 7.46 – 7.28 (m, 5H), 6.31 (t,  $J = 2.8$  Hz, 1H), 5.69 (t,  $J = 2.5$  Hz, 1H), 5.53 (dd,  $J_1 = 7.9$ ,  $J_2 = 6.6$  Hz, 1H), 3.41 (ddt,  $J_1 = 17.1$ ,  $J_2 = 8.1$ ,  $J_3 = 2.5$  Hz, 1H), 2.91 (ddt,  $J_1 = 17.1$ ,  $J_2 = 6.4$ ,  $J_3 = 2.9$  Hz, 1H);  $^{13}\text{C-NMR}$  (75.47 MHz,  $\text{CDCl}_3$ ): 170.3, 139.9, 134.3, 129.0, 128.7, 125.5, 122.6, 78.1, 36.4; IR (film)  $\tilde{\nu} = 3093$ , 3066, 3050, 3037, 2974, 2919, 2853, 1752, 1602, 1551, 1496, 1459, 1437, 1402, 1375, 1319, 1277, 1240, 1215, 1126, 1080, 1020, 985, 962, 938, 818, 761, 701, 639, 562  $\text{cm}^{-1}$ ; HPLC analysis on chiral stationary phase {Daicel Chiralcel IC, *n*-heptane/2-propanol 85/15, 1.0 mL/min, 20  $^\circ\text{C}$ , UV 215 nm,  $t_{\text{ret}}$ (enantiomer 1) = 10.1 min,  $t_{\text{ret}}$ (enantiomer 2) = 13.9 min}:  $t_{\text{ret}}$ (major isomer) = 13.7 min, 50% ee; HRMS(ESI):  $m/z$ : calc. for  $\text{C}_{11}\text{H}_{11}\text{O}_2^+$ : 175.0754  $[\text{M}+\text{H}]^+$ , found: 175.0755.

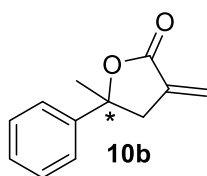

#### 5-Methyl-3-methylene-5-phenyldihydrofuran-2(3H)-one (**10b**).

Procedure A: Acetophenone, allyl bromide **7b**; solvent: toluene (1.0 mL); flash chromatography (silica gel, hexanes/EtOAc 3/1); yield: 16.9 mg, 90%, colorless oil;  $^1\text{H-NMR}$  (300.13 MHz,  $\text{CDCl}_3$ ): 7.42 – 7.27 (m, 5H), 6.26 (t,  $J = 2.8$  Hz, 1H), 5.64 (t,  $J = 2.4$  Hz, 1H), 3.19 – 3.13 (m, 2H), 1.73 (s, 3H);  $^{13}\text{C-NMR}$  (75.47 MHz,  $\text{CDCl}_3$ ): 169.8, 144.7, 135.2, 128.8, 127.8, 124.3, 122.8, 84.1, 42.8, 30.2; IR (film)  $\tilde{\nu} = 2957$ , 2921, 2851, 1760, 1690, 1653, 1601, 1496, 1446, 1378, 1238, 1052, 1027, 947, 763, 697  $\text{cm}^{-1}$ ; HPLC analysis on chiral stationary phase {Daicel Chiralcel OJ, *n*-heptane/2-propanol 85/15, 0.7 mL/min, 20  $^\circ\text{C}$ , UV 215 nm,  $t_{\text{ret}}$ (enantiomer 1) = 18.4 min,  $t_{\text{ret}}$ (enantiomer 2) = 21.8 min}:  $t_{\text{ret}}$ (major isomer) = 17.5 min, 70% ee; HRMS(ESI):  $m/z$ : calc. for  $\text{C}_{12}\text{H}_{13}\text{O}_2^+$ : 189.0910  $[\text{M}+\text{H}]^+$ , found: 189.0911.

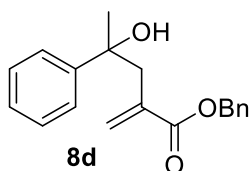

#### Benzyl 4-hydroxy-2-methylene-4-phenylpentanoate (**8d**).

Procedure A: Acetophenone, allyl bromide **7c**; solvent: toluene (1.0 mL); compound **8d** was prepared on analytical scale only. The sample was quenched in saturated aqueous NH<sub>4</sub>Cl solution (500  $\mu$ L), extracted with CH<sub>2</sub>Cl<sub>2</sub> (3 x 5 mL) and the combined organic phase was dried over Na<sub>2</sub>SO<sub>4</sub>, filtered and the filtrate was treated with trifluoroacetic acid (1.1 mg, 0.8  $\mu$ L, 10  $\mu$ mol, 0.1 eq.) and stirred at room temperature for 16 h to yield lactone **10b**. The reaction was quenched by the addition of saturated aqueous NaHCO<sub>3</sub> solution (5 mL), the organic phase was separated, dried over Na<sub>2</sub>SO<sub>4</sub>, filtered and subjected to HPLC analysis on chiral stationary phase {Daicel Chiralcel OJ, *n*-heptane/2-propanol 85/15, 0.7 mL/min, 20 °C, UV 215 nm,  $t_{ret}$ (enantiomer 1) = 18.4 min,  $t_{ret}$ (enantiomer 2) = 21.8 min):  $t_{ret}$ (major isomer) = 17.5 min, 77% ee.

#### General procedure for the preparation of racemic reference material (Procedure B).

A HPLC vial with magnetic stirring bar was charged with the ketone (25.0  $\mu$ mol, 1 eq.), zinc (8.0 mg, 125  $\mu$ mol, 5 eq.), NH<sub>4</sub>Cl (11.0 mg, 200  $\mu$ mol, 8 eq.) and diphenyl phosphate (2.0 mg, 8.0  $\mu$ mol, 0.3 eq.). Allylic bromide **7d** or **7e** (36.0  $\mu$ mol, 1.5 eq.) dissolved in toluene (200  $\mu$ L) was added and the reaction mixture was stirred at room temperature for 16 h. The suspension was filtered through a plug of silica gel (~1 g), the plug was rinsed with additional EtOAc (ca. 1 mL) and the combined filtrates were concentrated. The residue was dissolved in a small amount of EtOAc (ca. 100  $\mu$ L) and half of the solution was adsorbed on the starting line of a silica gel TLC plate (~8 cm wide). The plate was developed in the solvent indicated for flash chromatography for the specific compound (indicated below) and the product band was scratched off. The obtained silica gel with the adsorbed product was transferred into a HPLC vial with magnetic stirring bar and was extracted by stirring with 2-propanol (800  $\mu$ L) for 30 min at room temperature. The suspension was filtered through a syringe filter (Nylon, 0.2  $\mu$ m) and subjected to HPLC-MS on an achiral stationary phase and HPLC-UV analysis on a chiral stationary phase.

#### General procedure for the asymmetric allylation of ketones (Procedure C).

A 5 mL screw cap vial was charged with zinc (33.0 mg, 500  $\mu$ mol, 5 eq.), NH<sub>4</sub>Cl (43.0 mg, 800  $\mu$ mol, 8 eq.) and (*S*)-3,3'-bis(2,4,6-triisopropylphenyl)-1,1'-binaphthyl-2,2'-diyl hydrogenphosphate (TRIP, 7.5 mg, 10.0  $\mu$ mol, 0.1 eq.) followed by the respective solvent mixture (see compounds below for details). The ketone (100  $\mu$ mol) and the allyl bromide **7d** (50.0 mg, 150  $\mu$ mol, 1.5 eq.) were added [in case of product **8q** benzhydryl (*Z*)-2-(bromomethyl)but-2-enoate (**7e**, 52.0 mg, 150  $\mu$ mol, 1.5 eq.)]. The mixture was stirred (720 rpm) at room temperature for 16 h, quenched by the addition of NH<sub>4</sub>Cl<sub>sat., aq.</sub> solution (5 mL) and extracted with EtOAc (3 x 10 mL). The combined organic phase was dried over Na<sub>2</sub>SO<sub>4</sub>, filtered and concentrated under reduced pressure. The obtained crude product was purified via flash chromatography (SiO<sub>2</sub>, eluent is indicated below) to give the pure product.

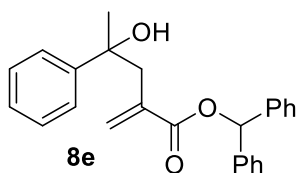

#### Benzhydryl 4-hydroxy-2-methylene-4-phenylpentanoate (**8e**).

Procedure C: Acetophenone (12.0 mg, 100  $\mu$ mol, 1 eq.); solvent: toluene/cyclohexane 1/1 (2 mL); flash chromatography (silica gel, hexanes/EtOAc 5/1); yield: 33.0 mg, 89.0  $\mu$ mol, 89%, colorless oil;  $[\alpha]_D^{20} = +21.4$  (c = 0.28, CHCl<sub>3</sub>); <sup>1</sup>H-NMR (300.13 MHz, CDCl<sub>3</sub>): 7.44-7.19 (m, 15H), 6.91 (s, 1H), 6.36 (d, *J* = 1.3, 1H), 5.51 (d, *J* = 1.0, 1H), 3.39 (br s, 1H), 2.93 (dd, *J*<sub>1</sub> = 14.0, *J*<sub>2</sub> = 0.6, 1H), 1.55 (s, 3H); <sup>13</sup>C-NMR (75.47 MHz, CDCl<sub>3</sub>): 168.0, 147.5, 140.04, 140.01, 136.6, 129.9, 128.69, 128.67, 128.15, 128.12, 127.2, 127.1, 126.7, 126.6, 125.1, 78.0, 74.2, 46.5, 29.9; IR (film)  $\tilde{\nu}$  = 3462 (br), 3062, 3030, 2974, 2930, 1698, 1624, 1494, 1447, 1300, 1150, 953, 910, 863, 759, 741, 695, 590 cm<sup>-1</sup>; HPLC analysis on chiral stationary phase {Daicel Chiralpak IA, *n*-heptane/2-propanol 90/10, 1.0 mL/min, 20 °C, UV 230 nm,  $t_{ret}$ (enantiomer 1) = 10.1 min,



$t_{\text{ret}}$ (enantiomer 2) = 12.0 min;  $t_{\text{ret}}$ (major isomer) = 10.1 min, 90% ee; HRMS(ESI):  $m/z$ : calc. for  $\text{C}_{25}\text{H}_{24}\text{O}_3\text{Na}^+$ : 395.1617  $[\text{M}+\text{Na}]^+$ , found: 395.1618.

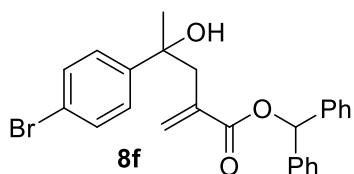

Benzhydryl 4-(4-bromophenyl)-4-hydroxy-2-methylenepentanoate (**8f**).

Procedure C: 4'-Bromoacetophenone (20.0 mg, 100  $\mu\text{mol}$ , 1 eq.); solvent: toluene/cyclohexane 2/1 (1.5 mL); flash chromatography (silica gel, hexanes/EtOAc 5/1); yield: 41.0 mg, 88.0  $\mu\text{mol}$ , 88%, colorless oil;  $[\alpha]_{\text{D}}^{20} = +26.9$  ( $c = 1.0$ ,  $\text{CHCl}_3$ );  $^1\text{H-NMR}$  (300.13 MHz,  $\text{CDCl}_3$ ): 7.40-7.22 (m, 14H), 6.87 (s, 1H), 6.34 (d,  $J = 1.2$ , 1H), 5.48 (d,  $J = 0.8$ , 1H), 3.59 (br s, 1H), 2.89 (dd,  $J_1 = 14.0$ ,  $J_2 = 0.6$ , 1H), 2.78 (d,  $J = 14.1$ , 1H), 1.51 (s, 3H);  $^{13}\text{C-NMR}$  (75.47 MHz,  $\text{CDCl}_3$ ): 168.0, 146.5, 139.91, 139.88, 136.4, 131.1, 130.2, 128.72, 128.70, 128.22, 128.17, 127.2, 127.1, 127.0, 120.5, 78.1, 74.0, 46.5, 30.1; IR (film)  $\tilde{\nu} = 3445$  (br), 3063, 3031, 2975, 2930, 1698, 1624, 1487, 1453, 1341, 1276, 1151, 1077, 1008, 911, 826, 742, 696, 589  $\text{cm}^{-1}$ ; HPLC analysis on chiral stationary phase {Daicel Chiralpak IA, *n*-heptane/2-propanol 90/10, 1.0 mL/min, 20  $^\circ\text{C}$ , UV 230 nm,  $t_{\text{ret}}$ (enantiomer 1) = 11.0 min,  $t_{\text{ret}}$ (enantiomer 2) = 13.9 min}:  $t_{\text{ret}}$ (major isomer) = 11.0 min, 87% ee; HRMS(ESI):  $m/z$ : calc. for  $\text{C}_{25}\text{H}_{23}\text{BrO}_3\text{Na}^+$ : 473.0723 and 475.0706  $[\text{M}+\text{Na}]^+$ , found: 473.0722 and 475.0709 (for the two most prominent isotopes).

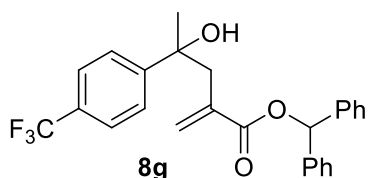

Benzhydryl 4-hydroxy-2-methylene-4-(trifluoromethyl)phenyl]pentanoate (**8g**).

Procedure C: 4'-(Trifluoromethyl)-acetophenone (16.0 mg, 100  $\mu\text{mol}$ , 1 eq.); solvent: toluene/cyclohexane 2/1 (1.5 mL); flash chromatography (silica gel, hexanes/EtOAc 5/1); yield: 39.0 mg, 89.0  $\mu\text{mol}$ , 89%, colorless oil;  $[\alpha]_{\text{D}}^{20} = +24.7$  ( $c = 1.0$ ,  $\text{CHCl}_3$ );  $^1\text{H-NMR}$  (300.13 MHz,  $\text{CDCl}_3$ ): 7.69 (br s, 1H), 7.57 (d,  $J = 7.7$ , 1H), 7.47 (d,  $J = 7.7$ , 1H), 7.41-7.29 (m, 11H), 6.90 (s, 1H), 6.35 (d,  $J = 1.2$ , 1H), 5.48 (d,  $J = 0.9$ , 1H), 3.72 (br s, 1H), 2.93 (dd,  $J_1 = 14.1$ ,  $J_2 = 0.6$ , 1H), 2.80 (d,  $J = 14.1$ , 1H), 1.54 (s, 3H);  $^{13}\text{C-NMR}$  (75.47 MHz,  $\text{CDCl}_3$ )  $\delta$  168.2, 148.6, 139.87, 139.84, 136.2, 130.42 (C-F,  $^2J_{\text{C-F}} = 31.9$  Hz), 130.37, 128.7 (C-F,  $^4J_{\text{C-F}} = 1.9$  Hz), 128.6, 128.3, 127.2, 127.0, 124.4 (C-F,  $^1J_{\text{C-F}} = 272.8$  Hz), 123.5 (C-F,  $^3J_{\text{C-F}} = 3.9$  Hz), 122.0 (C-F,  $^3J_{\text{C-F}} = 3.9$  Hz). 78.2, 74.1, 46.6, 30.0;  $^{19}\text{F-NMR}$  (282.39 MHz,  $\text{CDCl}_3$ ): -62.43 (s); IR (film)  $\tilde{\nu} = 3449$  (br), 3065, 3033, 2976, 2930, 1697, 1625, 1495, 1454, 1327, 1161, 1119, 1071, 956, 804, 755, 743, 696, 654, 588  $\text{cm}^{-1}$ ; HPLC analysis on chiral stationary phase {Daicel Chiralpak IA, *n*-heptane/2-propanol 90/10, 1.0 mL/min, 20  $^\circ\text{C}$ , UV 230 nm,  $t_{\text{ret}}$ (enantiomer 1) = 10.1 min,  $t_{\text{ret}}$ (enantiomer 2) = 12.0 min}:  $t_{\text{ret}}$ (major isomer) = 10.1 min, 88% ee; HRMS(ESI):  $m/z$ : calc. for  $\text{C}_{26}\text{H}_{23}\text{F}_3\text{O}_3\text{Na}^+$ : 463.1492  $[\text{M}+\text{Na}]^+$ , found: 463.1495.

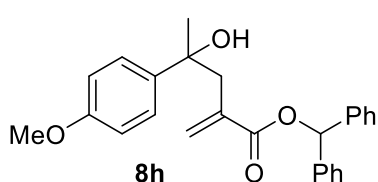

Benzhydryl 4-hydroxy-4-(4-methoxyphenyl)-2-methylenepentanoate (**8h**).

Procedure C: 4'-Methoxyacetophenone (15.0 mg, 100  $\mu\text{mol}$ , 1 eq.); solvent: toluene/cyclohexane 2/1 (1.5 mL); flash chromatography (silica gel, hexanes/EtOAc 10/1); yield: 34.0 mg, 85.0  $\mu\text{mol}$ , 85%, colorless oil;  $[\alpha]_{\text{D}}^{20} = +26.7$  ( $c = 1.0$ ,  $\text{CHCl}_3$ );  $^1\text{H-NMR}$  (300.13 MHz,  $\text{CDCl}_3$ ): 7.38-7.27 (m, 12H), 6.88 (s, 1H), 6.84-6.79 (m, 2H), 6.33 (d,  $J = 1.3$ , 1H), 5.48 (d,  $J = 1.0$ , 1H), 3.78 (s, 3H), 3.28 (br s, 1H), 2.89 (d,  $J = 14.4$ , 1H), 2.81 (d,  $J = 13.9$ , 1H), 1.51 (s, 3H);  $^{13}\text{C-NMR}$  (75.47 MHz,  $\text{CDCl}_3$ ): 168.0, 158.2, 140.1, 140.0, 139.7, 136.7, 129.8, 128.67, 128.66, 128.13, 128.10, 127.2, 127.1, 126.2, 113.4, 77.9, 73.9, 55.3, 46.6, 30.0; IR (film)  $\tilde{\nu} = 3466$  (br), 3032, 2971, 2932, 2835, 1713, 1611, 1510, 1454, 1299, 1246, 1151, 1031, 954, 908, 864, 811, 731, 696  $\text{cm}^{-1}$ ; HPLC analysis on chiral stationary phase {Daicel Chiralpak IA, *n*-heptane/2-propanol 90/10, 1.0 mL/min, 20  $^\circ\text{C}$ , UV 215 nm,  $t_{\text{ret}}$ (enantiomer 1) = 13.7 min,  $t_{\text{ret}}$ (enantiomer 2) = 18.5 min}:

$t_{\text{ret}}$ (major isomer) = 14.3 min, 87% ee; HRMS(ESI):  $m/z$ : calc. for  $\text{C}_{26}\text{H}_{26}\text{O}_4\text{Na}^+$ : 425.1723  $[\text{M}+\text{Na}]^+$ , found: 425.1722.

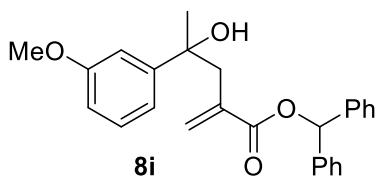

Benzhydryl 4-hydroxy-4-(3-methoxyphenyl)-2-methylenepentanoate (**8i**).

Procedure C: 3'-Methoxyacetophenone (15.0 mg, 100  $\mu\text{mol}$ , 1 eq.); solvent: toluene/cyclohexane 2/1 (1.5 mL); flash chromatography (silica gel, hexanes/EtOAc 5/1); yield: 33.0 mg, 82.0  $\mu\text{mol}$ , 82%, colorless oil;  $[\alpha]_{\text{D}}^{20} = +15.6$  ( $c = 1.0$ ,  $\text{CHCl}_3$ );  $^1\text{H-NMR}$  (300.13 MHz,  $\text{CDCl}_3$ ): 7.46 – 7.27 (m, 10H), 7.21 (t,  $J = 7.9$  Hz, 1H), 7.03 – 6.98 (m, 1H), 6.95 (ddd,  $J_1 = 7.7$ ,  $J_2 = 1.6$ ,  $J_3 = 0.9$  Hz, 1H), 6.90 (s, 1H), 6.75 (ddd,  $J_1 = 8.2$ ,  $J_2 = 2.6$ ,  $J_3 = 0.8$  Hz, 1H), 6.34 (d,  $J = 1.3$  Hz, 1H), 5.51 (d,  $J = 1.0$  Hz, 1H), 3.77 (s, 3H), 2.90 (dd,  $J_1 = 14.0$ ,  $J_2 = 0.6$ , 1H), 2.82 (d,  $J = 14.0$ , 1H), 1.51 (s, 3H);  $^{13}\text{C-NMR}$  (75.47 MHz,  $\text{CDCl}_3$ ): 168.1, 159.6, 149.4, 140.03, 140.00, 136.6, 130.0, 129.1, 128.69, 128.68, 128.2, 128.1, 127.2, 127.1, 117.5, 112.0, 111.0, 78.0, 74.2, 55.3, 46.4, 29.9; IR (film)  $\tilde{\nu} = 3467$  (br), 3063, 3031, 2961, 2852, 1713, 1600, 1583, 1487, 1453, 1432, 1288, 1255, 1241, 1153, 10.43, 955, 758, 741, 695  $\text{cm}^{-1}$ ; HPLC analysis on chiral stationary phase {Daicel Chiralpak IA, *n*-heptane/2-propanol 90/10, 1.0 mL/min, 20  $^\circ\text{C}$ , UV 230 nm,  $t_{\text{ret}}$ (enantiomer 1) = 9.9 min,  $t_{\text{ret}}$ (enantiomer 2) = 17.1 min}:  $t_{\text{ret}}$ (major isomer) = 9.8 min, 82% ee; HRMS(ESI):  $m/z$ : calc. for  $\text{C}_{26}\text{H}_{26}\text{O}_4\text{Na}^+$ : 425.1723  $[\text{M}+\text{Na}]^+$ , found: 425.1722.

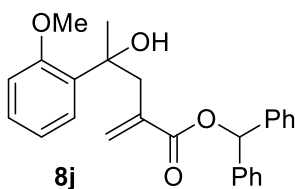

Benzhydryl 4-hydroxy-4-(2-methoxyphenyl)-2-methylenepentanoate (**8j**).

Procedure C: 2'-Methoxyacetophenone (15.0 mg, 100  $\mu\text{mol}$ , 1 eq.); solvent: toluene/cyclohexane 2/1 (1.5 mL); flash chromatography (silica gel, hexanes/EtOAc 10/1); yield: 29.0 mg, 72.0  $\mu\text{mol}$ , 72%, colorless oil;  $[\alpha]_{\text{D}}^{20} = +21.4$  ( $c = 1.0$ ,  $\text{CHCl}_3$ );  $^1\text{H-NMR}$  (300.13 MHz,  $\text{CDCl}_3$ ): 7.40 – 7.16 (m, 12H), 6.89–6.83 (m, 3H), 6.25 (d,  $J = 1.6$  Hz, 1H), 5.54 – 5.45 (m, 1H), 4.51 (brs, 1H), 3.82 (s, 3H), 3.16 (d,  $J = 13.8$  Hz, 1H), 2.91 (dd,  $J = 13.8$ ,  $J_2 = 0.7$  Hz, 1H), 1.56 (s, 3H);  $^{13}\text{C-NMR}$  (75.47 MHz,  $\text{CDCl}_3$ ): 167.8, 156.4, 140.20, 140.17, 137.5, 134.5, 129.0, 128.63, 128.59, 128.3, 128.1, 128.0, 127.3, 127.1, 127.0, 120.8, 111.0, 77.6, 74.6, 55.2, 43.8, 27.1; IR (film)  $\tilde{\nu} = 3465$ , 3063, 3032, 2928, 2851, 1716, 1694, 1623, 1600, 1583, 1488, 1454, 1436, 1398, 1362, 1295, 1280, 1234, 1152, 1121, 1060, 1047, 1026, 1001, 955, 812, 798, 753, 651, 591  $\text{cm}^{-1}$ ; HPLC analysis on chiral stationary phase {Daicel Chiralpak IA, *n*-heptane/2-propanol 90/10, 1.0 mL/min, 20  $^\circ\text{C}$ , UV 215 nm,  $t_{\text{ret}}$ (enantiomer 1) = 11.4 min,  $t_{\text{ret}}$ (enantiomer 2) = 14.9 min}:  $t_{\text{ret}}$ (major isomer) = 11.1 min, 77% ee; HRMS(ESI):  $m/z$ : calc. for  $\text{C}_{26}\text{H}_{26}\text{O}_4\text{Na}^+$ : 425.1723  $[\text{M}+\text{Na}]^+$ , found: 425.1723.

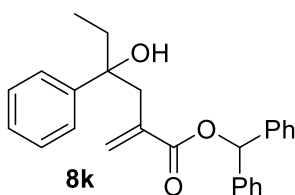

Benzhydryl 4-hydroxy-2-methylene-4-phenylhexanoate (**8k**).

Procedure C: Propiophenone (14.0 mg, 100  $\mu\text{mol}$ , 1 eq.); solvent: toluene/cyclohexane 2/1 (1.5 mL); flash chromatography (silica gel, hexanes/EtOAc 10/1); yield: 32.0 mg, 83.0  $\mu\text{mol}$ , 83%, colorless oil;  $[\alpha]_{\text{D}}^{20} = +25.4$  ( $c = 1.0$ ,  $\text{CHCl}_3$ );  $^1\text{H-NMR}$  (300.13 MHz,  $\text{CDCl}_3$ ): 7.42 – 7.23 (m, 14H), 7.23 – 7.14 (m, 1H), 6.87 (s, 1H), 6.26 (d,  $J = 1.4$  Hz, 1H), 5.39 (d,  $J = 1.0$  Hz, 1H), 3.36 (s, 1H), 2.97 (dd,  $J_1 = 14.0$ ,  $J_2 = 0.7$  Hz, 1H), 2.78 (dd,  $J_1 = 14.0$ ,  $J_2 = 0.5$  Hz, 1H), 1.97 – 1.72 (m, 2H), 0.75 (t,  $J = 7.4$  Hz, 3H);  $^{13}\text{C-NMR}$  (75.47 MHz,  $\text{CDCl}_3$ ): 168.2, 145.3, 140.0, 136.5, 129.7, 128.67, 128.65, 128.15, 128.07, 127.97, 127.3, 127.2, 127.1, 126.4, 125.8, 77.9, 76.7, 45.6, 35.4, 7.9; IR (film)  $\tilde{\nu} = 3459$ , 3088, 3062, 3031, 2967, 2929, 2878, 1696, 1624, 1494, 1447, 1299, 1123, 1080, 978, 961, 910, 813, 759, 741, 696, 592  $\text{cm}^{-1}$ ; HPLC analysis on chiral stationary phase {Daicel Chiralpak IC, *n*-heptane/2-propanol 98/2, 1.0 mL/min, 20  $^\circ\text{C}$ , UV 230 nm,  $t_{\text{ret}}$ (enantiomer 1) = 9.1 min,  $t_{\text{ret}}$ (enantiomer 2) = 13.1 min}:  $t_{\text{ret}}$ (major isomer) = 13.0 min, 92% ee; HRMS(ESI):  $m/z$ : calc. for  $\text{C}_{26}\text{H}_{26}\text{O}_3\text{Na}^+$ : 409.1774  $[\text{M}+\text{Na}]^+$ , found: 409.1773.

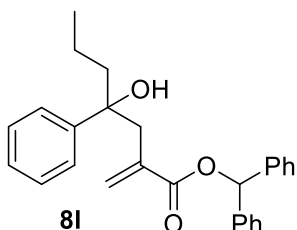

#### Benzhydryl 4-hydroxy-2-methylene-4-phenylheptanoate (**8l**).

Procedure C: Butyrophenone (15.0 mg, 100  $\mu$ mol, 1 eq.); solvent: toluene/cyclohexane 2/1 (1.5 mL); flash chromatography (silica gel, hexanes/EtOAc 10/1); yield: 37.0 mg, 92.0  $\mu$ mol, 92%, colorless oil;  $[\alpha]_D^{20} = +29.6$  ( $c = 0.5$ ,  $\text{CHCl}_3$ );  $^1\text{H-NMR}$  (300.13 MHz,  $\text{CDCl}_3$ ): 7.39 – 7.23 (m, 14H), 7.21 – 7.13 (m, 1H), 6.87 (s, 1H), 6.27 (d,  $J = 1.3$  Hz, 1H),

5.40 (d,  $J = 0.9$  Hz, 1H), 3.37 (br s, 1H), 2.97 (dd,  $J_1 = 14.0$ ,  $J_2 = 0.4$  Hz, 1H), 2.78 (d,  $J = 14.2$  Hz, 1H), 1.79 (m, 2H), 1.44 – 1.24 (m, 1H), 1.13 – 0.92 (m, 1H), 0.81 (t,  $J = 7.3$  Hz, 3H);  $^{13}\text{C-NMR}$  (75.47 MHz,  $\text{CDCl}_3$ ): 168.2, 145.7, 140.0, 136.5, 129.8, 128.68, 128.65, 128.2, 128.1, 128.0, 127.3, 127.1, 126.3, 125.6, 77.9, 76.6, 45.9, 45.1, 16.9, 14.5; IR (film)  $\tilde{\nu} = 3469$  (br s), 3087, 3062, 3030, 2957, 2930, 2871, 1670, 1495, 1448, 1299, 1149, 1126, 1030, 953, 858, 813, 758, 741, 695, 591  $\text{cm}^{-1}$ ; HPLC analysis on chiral stationary phase {Daicel Chiralpak IC, *n*-heptane/2-propanol 98/2, 1.0 mL/min, 20  $^\circ\text{C}$ , UV 215 nm,  $t_{\text{ret}}$ (enantiomer 1) = 8.0 min,  $t_{\text{ret}}$ (enantiomer 2) = 12.2 min}:  $t_{\text{ret}}$ (major isomer) = 12.8 min, 93% ee; HRMS(ESI):  $m/z$ : calc. for  $\text{C}_{27}\text{H}_{28}\text{O}_3\text{Na}^+$ : 423.1931  $[\text{M}+\text{Na}]^+$ , found: 423.1932.

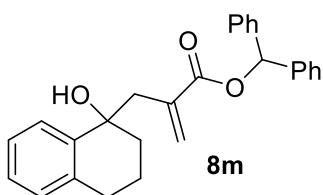

#### Benzhydryl 2-[(1-hydroxy-1,2,3,4-tetrahydronaphthalen-1-yl)methyl]acrylate (**8m**).

Procedure C:  $\alpha$ -Tetralone (15.0 mg, 100  $\mu$ mol, 1 eq.); solvent: toluene/cyclohexane 2/1 (1.5 mL); flash chromatography (silica gel, hexanes/EtOAc 5/1); yield: 34.0 mg, 85.0  $\mu$ mol, 85%, colorless oil;

$[\alpha]_D^{20} = +35.5$  ( $c = 1.0$ ,  $\text{CHCl}_3$ );  $^1\text{H-NMR}$  (300.13 MHz,  $\text{CDCl}_3$ ): 7.54-7.51 (m, 1H), 7.41-7.27 (m, 10H), 7.17-7.12 (m, 2H), 7.06-7.03 (m, 1H), 6.94 (s, 1H), 6.49 (d,  $J = 1.4$ , 1H), 5.68 (d,  $J = 0.7$ , 1H), 3.23 (br s, 1H), 3.02 (d,  $J = 14.1$ , 1H), 2.78-2.74 (m, 3H), 1.97-1.90 (m, 1H), 1.87-1.74 (m, 3H);  $^{13}\text{C-NMR}$  (75.47 MHz,  $\text{CDCl}_3$ ): 168.0, 142.5, 140.2, 140.0, 136.9, 136.4, 129.9, 128.8, 128.7, 128.6, 128.1, 127.21, 127.19, 127.1, 126.7, 126.6, 126.2, 78.0, 72.2, 44.5, 35.7, 29.7, 20.1; IR (film)  $\tilde{\nu} = 3457$  (br), 3063, 3030, 2936, 2836, 2869, 2838, 1713, 1494, 1451, 1300, 1233, 1141, 1080, 1022, 975, 951, 877, 759, 737, 696, 651, 618  $\text{cm}^{-1}$ ; HPLC analysis on chiral stationary phase {Daicel Chiralpak IA, *n*-heptane/2-propanol 80/20, 1.0 mL/min, 20  $^\circ\text{C}$ , UV 230 nm,  $t_{\text{ret}}$ (enantiomer 1) = 7.8 min,  $t_{\text{ret}}$ (enantiomer 2) = 13.1 min}:  $t_{\text{ret}}$ (major isomer) = 7.8 min, 93% ee; HRMS(ESI):  $m/z$ : calc. for  $\text{C}_{27}\text{H}_{26}\text{O}_3\text{Na}^+$ : 421.1774  $[\text{M}+\text{Na}]^+$ , found: 421.1778.

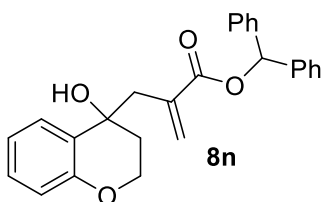

#### Benzhydryl 2-[(4-hydroxychroman-4-yl)methyl]acrylate (**8n**).

Procedure C: 4-Chromanone (15.0 mg, 100  $\mu$ mol, 1 eq.); solvent: toluene/cyclohexane 2/1 (1.5 mL); flash chromatography (silica gel, hexanes/EtOAc 5/1); yield: 36.0 mg, 90.0  $\mu$ mol, 90%, colorless oil;  $[\alpha]_D^{20} = +15.4$  ( $c = 1.0$ ,  $\text{CHCl}_3$ );  $^1\text{H-NMR}$  (300.13 MHz,  $\text{CDCl}_3$ ): 7.44 (dd,  $J_1 = 7.8$ ,  $J_2 = 1.6$  Hz, 1H), 7.40 – 7.27 (m, 10H), 7.15 (ddd,  $J_1 = 8.3$ ,

$J_2 = 7.3$ ,  $J_3 = 1.7$  Hz, 1H), 6.90 (td,  $J_1 = 7.8$ ,  $J_2 = 1.2$  Hz, 1H), 6.80 (dd,  $J_1 = 8.2$ ,  $J_2 = 1.1$  Hz, 1H), 6.52 (d,  $J = 1.2$  Hz, 1H), 5.71 (d,  $J = 0.6$  Hz, 1H), 4.19 (t,  $J = 5.8$  Hz, 2H), 3.20 (d,  $J = 13.9$  Hz, 1H), 2.77 (d,  $J = 14.2$  Hz, 1H), 1.97 (dd,  $J_1 = 11.2$ ,  $J_2 = 4.9$  Hz, 2H);  $^{13}\text{C-NMR}$  (75.47 MHz,  $\text{CDCl}_3$ ): 167.9, 154.0, 140.0, 139.9, 136.4, 130.5, 129.1, 128.7, 128.24, 128.21, 128.16, 127.20, 127.17, 126.8, 120.8, 117.1, 78.2, 68.0, 63.4, 43.9, 34.9; IR (film)  $\tilde{\nu} = 3457$  (br), 3063, 3032, 2959, 2927, 2885, 1712, 1607, 1581, 1487, 1451, 1306, 1254, 1220, 1079, 1056, 975, 956, 908, 856, 804, 754, 733, 696, 591  $\text{cm}^{-1}$ ; HPLC analysis on chiral stationary phase {Daicel Chiralpak IA, *n*-heptane/2-propanol 80/20, 1.0 mL/min, 20  $^\circ\text{C}$ , UV 230 nm,  $t_{\text{ret}}$ (enantiomer 1) = 7.8 min,  $t_{\text{ret}}$ (enantiomer 2) = 13.1 min}:  $t_{\text{ret}}$ (major isomer) = 8.8 min, 97% ee; HRMS(ESI):  $m/z$ : calc. for  $\text{C}_{26}\text{H}_{24}\text{O}_4\text{Na}^+$ : 423.1567  $[\text{M}+\text{Na}]^+$ , found: 423.1569.



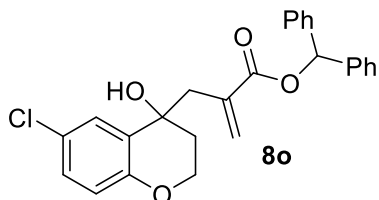

Benzhydryl 2-[(6-chloro-4-hydroxychroman-4-yl)methyl]acrylate (**8o**).

Procedure C [but (*R*)-TRIP (0.1 eq. was used)]: 6-Chloro-4-Chromanone (18.3 mg, 100  $\mu$ mol, 1 eq.); solvent: toluene/cyclohexane 2/1 (1.5 mL); flash chromatography (silica gel, hexanes/EtOAc 5/1); yield: 40.0 mg, 92.0  $\mu$ mol, 92%,

colorless oil;  $[\alpha]_D^{20} = -16.8$  ( $c = 1.0$ ,  $\text{CHCl}_3$ );  $^1\text{H-NMR}$  (300.13 MHz,  $\text{CDCl}_3$ ): 7.41 (d,  $J = 2.6$  Hz, 1H), 7.38 – 7.27 (m, 10H), 7.09 (dd,  $J_1 = 8.7$ ,  $J_2 = 2.6$  Hz, 1H), 6.96 (s, 1H), 6.73 (d,  $J = 8.8$  Hz, 1H), 6.55 (d,  $J = 1.2$  Hz, 1H), 5.72 (d,  $J = 1.1$  Hz, 1H), 4.17 (td,  $J_1 = 5.7$ ,  $J_2 = 1.4$  Hz, 2H), 3.12 (dd,  $J_1 = 14.3$ ,  $J_2 = 1.0$  Hz, 1H), 2.74 (d,  $J = 14.2$  Hz, 1H), 1.94 (ddd,  $J_1 = 6.2$ ,  $J_2 = 4.4$ ,  $J_3 = 2.7$  Hz, 2H);  $^{13}\text{C-NMR}$  (75.47 MHz,  $\text{CDCl}_3$ ): 168.0, 152.6, 139.9, 139.8, 136.0, 131.0, 129.8, 129.1, 128.80, 128.76, 128.32, 128.28, 127.2, 126.7, 125.5, 118.5, 78.4, 67.9, 63.6, 44.1, 34.6; IR (film)  $\tilde{\nu} = 3445$  (br), 1710, 1624, 1483, 1455, 1411, 1295, 1253, 1224, 1149, 1093, 1780, 1052, 1031, 977, 957, 907, 814, 732, 697, 652  $\text{cm}^{-1}$ ; HPLC analysis on chiral stationary phase {Daicel Chiralpak IA, *n*-heptane/2-propanol 80/20, 1.0 mL/min, 30  $^\circ\text{C}$ , UV 230 nm,  $t_{\text{ret}}$ (enantiomer 1) = 7.2 min,  $t_{\text{ret}}$ (enantiomer 2) = 10.4 min}:  $t_{\text{ret}}$ (major isomer) = 10.5 min, 86% ee; HRMS(ESI):  $m/z$ : calc. for  $\text{C}_{26}\text{H}_{23}\text{ClO}_4\text{Na}^+$ : 457.1177 [ $\text{M}+\text{Na}$ ] $^+$ , found: 457.1176.

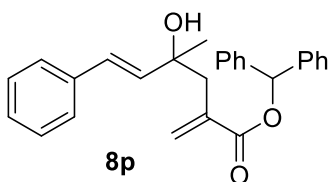

Benzhydryl (*E*)-4-hydroxy-4-methyl-2-methylene-6-phenylhex-5-enoate (**8p**).

Procedure C: (*E*)-4-Phenylbut-3-en-2-one (15.0 mg, 100  $\mu$ mol, 1 eq.); solvent: toluene/cyclohexane 2/1 (1.5 mL); flash chromatography (silica gel, hexanes/EtOAc 5/1); yield: 23.0 mg,

58.0  $\mu$ mol, 58%, colorless oil;  $[\alpha]_D^{20} = +15.0$  ( $c = 1.0$ ,  $\text{CHCl}_3$ );  $^1\text{H-NMR}$  (300.13 MHz,  $\text{CDCl}_3$ ): 7.46 – 7.13 (m, 15H), 6.86 (s, 1H), 6.54 (d,  $J = 16.0$  Hz, 1H), 6.45 (d,  $J = 1.4$  Hz, 1H), 6.23 (d,  $J = 16.0$  Hz, 1H), 5.73 (d,  $J = 1.1$  Hz, 1H), 2.85 (s, 1H), 2.79 (d,  $J = 13.8$  Hz, 1H), 2.67 (d,  $J = 13.8$  Hz, 1H), 1.36 (s, 3H);  $^{13}\text{C-NMR}$  (75.47 MHz,  $\text{CDCl}_3$ ): 167.6, 140.1, 140.0, 137.1, 136.8, 136.1, 129.7, 128.71, 128.67, 128.64, 128.5, 128.1, 127.4, 127.3, 127.2, 127.1, 126.6, 77.9, 72.6, 44.9, 28.5; IR (film)  $\tilde{\nu} = 3461$  (br), 3061, 3029, 2963, 2925, 2852, 1713, 1625, 1494, 1449, 1299, 1160, 965, 911, 853, 814, 743, 693, 652, 585  $\text{cm}^{-1}$ ; HPLC analysis on chiral stationary phase {Daicel Chiralpak IA, *n*-heptane/2-propanol 90/10, 1.0 mL/min, 20  $^\circ\text{C}$ , UV 230 nm,  $t_{\text{ret}}$ (enantiomer 1) = 11.0 min,  $t_{\text{ret}}$ (enantiomer 2) = 19.0 min}:  $t_{\text{ret}}$ (major isomer) = 10.7 min, 33% ee; HRMS(ESI):  $m/z$ : calc. for  $\text{C}_{27}\text{H}_{26}\text{O}_3\text{Na}^+$ : 421.1774 [ $\text{M}+\text{Na}$ ] $^+$ , found: 421.1776.

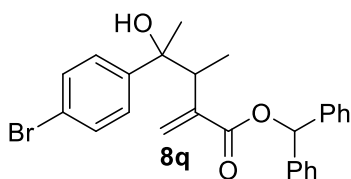

Benzhydryl 4-(4-bromophenyl)-4-hydroxy-3-methyl-2-methylenepentanoate (**8q**).

Procedure C: 4'-Bromoacetophenone (10.0 mg, 50.0  $\mu$ mol, 1 eq.); solvent: toluene (0.5 mL); flash chromatography (silica gel, hexanes/EtOAc 10/1); yield: 19.0 mg, 41.0  $\mu$ mol, 82%, colorless

oil;  $[\alpha]_D^{20} = -10.5$  ( $c = 1.0$ ,  $\text{CHCl}_3$ );  $^1\text{H-NMR}$  (300.13 MHz,  $\text{CDCl}_3$ ): 7.46 – 7.27 (m, 15H), 6.95 (s, 1H), 6.47 (d,  $J = 0.8$  Hz, 1H), 5.69 (s, 1H), 3.16 (q,  $J = 7.2$  Hz, 1H), 1.37 (s, 3H), 0.89 (d,  $J = 7.2$  Hz, 3H);  $^{13}\text{C-NMR}$  (75.47 MHz,  $\text{CDCl}_3$ ): 167.9, 145.9, 142.4, 140.0, 131.0, 128.8, 128.7, 128.3, 128.2, 128.0, 127.5, 127.3, 127.0, 126.7, 120.5, 78.1, 75.4, 46.8, 30.0, 14.6; IR (film)  $\tilde{\nu} = 3444$  (br), 3087, 3064, 3031, 2974, 2935, 2877, 1766, 1697, 1622, 1588, 1488, 1454, 1395, 1259, 1158, 1075, 1031, 1007, 955, 919, 822, 757, 740, 696, 588  $\text{cm}^{-1}$ ; HPLC analysis on chiral stationary phase {Daicel Chiralpak IA, *n*-heptane/2-propanol 90/10, 1.0 mL/min, 20  $^\circ\text{C}$ , UV 215 nm,  $t_{\text{ret}}$ (enantiomer 1) = 8.5 min,  $t_{\text{ret}}$ (enantiomer 2) = 12.6 min}:  $t_{\text{ret}}$ (major isomer) = 8.5 min, 89% ee; HRMS(ESI):  $m/z$ : calc. for  $\text{C}_{27}\text{H}_{26}\text{O}_3\text{Na}^+$ : 487.0879 [ $\text{M}+\text{Na}$ ] $^+$ , found: 487.0884.

General procedure for the asymmetric allylation of ketones with amide reagents **SI9** and **SI10** (Procedure D).

A 5 mL screw cap vial was charged with zinc (33.0 mg, 500  $\mu\text{mol}$ , 5 eq.),  $\text{NH}_4\text{Cl}$  (43.0 mg, 800  $\mu\text{mol}$ , 8 eq.) and (*R*)-3,3'-bis(2,4,6-triisopropylphenyl)-1,1'-binaphthyl-2,2'-diyl hydrogenphosphate ((*R*)-TRIP, 7.5 mg, 10.0  $\mu\text{mol}$ , 0.1 eq.) followed by the respective solvent mixture (see compounds below for details). The ketone (100  $\mu\text{mol}$ ) and reagent **SI9** or **SI10** were added (see below for details). The mixture was stirred (720 rpm) at room temperature for 16 h, quenched by the addition of  $\text{NH}_4\text{Cl}_{\text{sat.}, \text{aq.}}$  solution (5 mL) and extracted with EtOAc (3 x 10 mL). The combined organic phase was dried over  $\text{Na}_2\text{SO}_4$ , filtered and concentrated under reduced pressure. The obtained crude product was purified via flash chromatography ( $\text{SiO}_2$ , eluent is indicated below) to give the pure product.

*N,N*-dibenzyl-4-hydroxy-2-methylene-4-phenylpentanamide (**8r**).

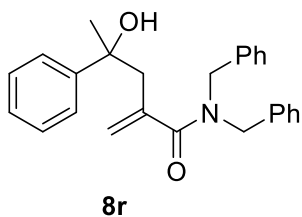

Procedure D: Acetophenone (12.0 mg, 100  $\mu\text{mol}$ , 1 eq.); *N,N*-dibenzyl-2-(bromomethyl)acrylamide (**7f**) (51.6 mg, 150  $\mu\text{mol}$ , 1.5 eq.); solvent: toluene/pentane 1/1 (2 mL); preparative HPLC [Phenomenex LUNA AXIA<sup>TM</sup> pack (5  $\mu\text{m}$ , C18(2), 100  $\text{\AA}$ , 250 x 21.2 mm), 30 mL/min flow, gradient eluent:  $\text{H}_2\text{O}/\text{MeCN}$  from 90/10 to 0/100 in 30 min.] yield compound **8r**: 11.6 mg, 30.0  $\mu\text{mol}$ , 30%, colorless oil;  $[\alpha]_{\text{D}}^{20} = -1.2$  ( $c = 1.0$ ,  $\text{CHCl}_3$ );  $^1\text{H}$  NMR (300 MHz, Chloroform-*d*)  $\delta$  7.59 – 7.42 (m, 2H), 7.41 – 7.26 (m, 8H), 7.20 (tt,  $J_1 = 6.3$ ,  $J_2 = 1.3$  Hz, 3H), 7.10 (d,  $J_1 = 6.6$  Hz, 2H), 5.18 (d,  $J = 0.7$  Hz, 1H), 4.90 (d,  $J = 1.0$  Hz, 1H), 4.73 – 4.30 (m, 4H), 3.24 (s, 1H), 2.87 – 2.63 (m, 2H), 1.63 (s, 3H).  $^{13}\text{C}$  NMR (75 MHz,  $\text{CDCl}_3$ )  $\delta$  174.5, 147.9, 138.7, 136.5, 136.2, 129.1, 128.8, 128.6, 128.0, 127.8, 127.0, 126.4, 125.3, 120.5, 74.2, 51.5, 49.2, 47.1, 30.7. IR (film)  $\tilde{\nu} = 3310$  (br), 3028, 2974, 1684, 1637, 1596, 1494, 1472, 1451, 1432, 1364, 1312, 1200, 1135, 1078, 1066, 1028, 909, 750, 728, 697, 665, 576, 490  $\text{cm}^{-1}$ ; HPLC analysis on chiral stationary phase {Diacel Chiralpack IA, *n*-heptane/2-propanol 95/5, 1.0 mL/min, 20  $^\circ\text{C}$ , UV 215 nm,  $t_{\text{ret}}$  (enantiomer 1) = 13.8 min,  $t_{\text{ret}}$  (enantiomer 2) = 17.0 min,  $t_{\text{ret}}$  (major isomer) = 13.9 min, 11% ee; HRMS(ESI):  $m/z$ : calc. for  $\text{C}_{26}\text{H}_{28}\text{NO}_2^+$ : 386.211294  $[\text{M}+\text{H}]^+$ , found: 386.211456.

*N,N*-diethyl-4-hydroxy-2-methylene-4-phenylpentanamide (**SI12**).

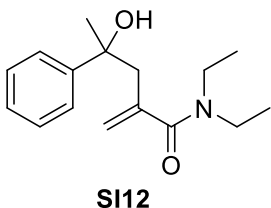

Procedure D: Acetophenone (9.6 mg, 80  $\mu\text{mol}$ , 1 eq.); *N,N*-diethyl-2-(bromomethyl)acrylamide (**SI9**) (24.2 mg, 110  $\mu\text{mol}$ , 1.35 eq.); solvent: toluene/pentane 1/1 (2 mL); no product could be observe.

## Determination of absolute configuration and diastereoselectivity

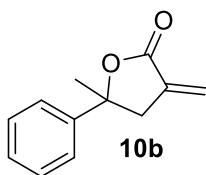

(*S*)-5-Methyl-3-methylene-5-phenyldihydrofuran-2(3*H*)-one (**10b**).

Compound **8c** (12.6 mg, 34.0  $\mu\text{mol}$ ) was treated with *para*-toluenesulfonic acid (2.0 mg, 11.0  $\mu\text{mol}$ ) in  $\text{CHCl}_3$  (500  $\mu\text{L}$ ) at room temperature for 16 h. The reaction mixture was quenched with brine (5 mL), extracted with  $\text{CHCl}_3$  (3 x 10 mL), the combined organic phase was dried over  $\text{Na}_2\text{SO}_4$ , filtered and concentrated. The crude product was purified via flash chromatography (silica gel, cyclohexane/EtOAc 10/1) to give lactone **10b** (5.6 mg, 30  $\mu\text{mol}$ , 88%) with the physical properties described above.

$[\alpha]_D^{20} = +8.0$  ( $c = 0.5$ ,  $\text{CHCl}_3$ ), lit.:  $[\alpha]_D^{20} = -11.3$  ( $c = 1.2$ ,  $\text{CHCl}_3$ ) for the (*R*)-enantiomer (93% ee);<sup>5</sup>  $[\alpha]_D^{20} = -3.4$  ( $c = 0.5$ ,  $\text{CH}_2\text{Cl}_2$ ), lit.:  $[\alpha]_D^{20} = -2.2$  ( $c = 0.25$ ,  $\text{CH}_2\text{Cl}_2$ ) for the (*S*)-enantiomer (45% ee);<sup>6</sup> HPLC analysis on chiral stationary phase {Daicel Chiralcel OJ, *n*-heptane/2-propanol 85/15, 0.7 mL/min, 20 °C, UV 215 nm,  $t_{\text{ret}}$ (enantiomer 1) = 18.4 min,  $t_{\text{ret}}$ (enantiomer 2) = 21.8 min}:  $t_{\text{ret}}$ (major isomer) = 17.2 min, 72% ee.

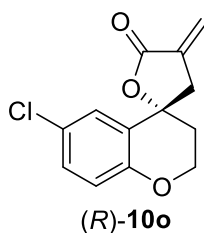

Preparation of (*R*)-6-chloro-4'-methylene-3',4'-dihydro-5'-H-spiro[chromane-4,2'-furan]-5'-one (**10o**) with DMAP.

Compound **8o** (96 mg, 221  $\mu\text{mol}$ ) was treated with 4-(dimethylamino)pyridine (54 mg, 442  $\mu\text{mol}$ ) in EtOH (2.2 mL) at room temperature for 16 h. The reaction mixture was quenched with brine (5 mL), extracted with  $\text{CH}_2\text{Cl}_2$  (3 x 15 mL), the combined organic phase was dried over  $\text{Na}_2\text{SO}_4$ , filtered and concentrated. The crude product was purified via flash chromatography (silica gel, cyclohexane/EtOAc 5/1) to give lactone (*R*)-**10o** (77 mg, 307  $\mu\text{mol}$ , 90%) as a colorless oil.

$[\alpha]_D^{20} = +79.8$  ( $c = 1.1$ ,  $\text{CHCl}_3$ );  $^1\text{H-NMR}$  (300.13 MHz,  $\text{CDCl}_3$ ): 7.19 – 7.14 (m, 2H), 6.79 (dd,  $J_1 = 8.4$ ,  $J_2 = 0.7$  Hz, 1H), 6.38 (t,  $J = 2.9$  Hz, 1H), 5.78 (t,  $J = 2.5$  Hz, 1H), 4.43 – 4.18 (m, 2H), 3.31 (dt,  $J_1 = 17.5$ ,  $J_2 = 2.7$  Hz, 1H), 3.03 (dt,  $J_1 = 17.5$ ,  $J_2 = 2.7$  Hz, 1H), 2.31 (ddd,  $J_1 = 14.2$ ,  $J_2 = 6.5$ ,  $J_3 = 3.1$  Hz, 1H), 2.14 (ddd,  $J_1 = 14.2$ ,  $J_2 = 8.8$ ,  $J_3 = 3.7$  Hz, 1H);  $^{13}\text{C-NMR}$  (75.47 MHz,  $\text{CDCl}_3$ ): 168.9, 153.3, 134.5, 130.6, 126.3, 126.0, 125.0, 123.5, 119.1, 77.4, 63.1, 41.2, 35.6; IR (film)  $\tilde{\nu} = 1757, 1663, 1574, 1482, 1414, 1398, 1254, 1226, 1167, 1132, 1097, 1079, 1045, 1010, 974, 942, 883, 851, 787, 699, 687, 644, 604$   $\text{cm}^{-1}$ ; HPLC analysis on chiral stationary phase {Daicel Chiralpak IA, *n*-heptane/2-propanol 80/20, 1.0 mL/min, 30 °C, UV 230 nm,  $t_{\text{ret}}$ (enantiomer 1) = 6.7 min,  $t_{\text{ret}}$ (enantiomer 2) = 7.4 min}:  $t_{\text{ret}}$ (major isomer) = 7.5 min, 86% ee; HRMS(ESI):  $m/z$ : calc. for  $\text{C}_{13}\text{H}_{12}\text{ClO}_3^+$ : 251.0469 [M+H]<sup>+</sup>, found: 251.0471.

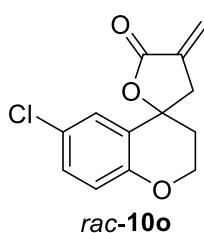

Preparation of *rac*-6-chloro-4'-methylene-3',4'-dihydro-5'-H-spiro[chromane-4,2'-furan]-5'-one (**10o**) with *p*TSA.

Compound **8o** (146 mg, 340  $\mu\text{mol}$ ) was treated with *para*-toluenesulfonic acid monohydrate (20 mg, 110  $\mu\text{mol}$ ) in  $\text{CH}_2\text{Cl}_2$  (700  $\mu\text{L}$ ) at room temperature for 16 h. The reaction mixture was quenched with brine (5 mL), extracted with  $\text{CH}_2\text{Cl}_2$  (3 x 15 mL), the combined organic phase was dried over  $\text{Na}_2\text{SO}_4$ , filtered and concentrated. The crude product was purified via flash chromatography (silica gel, cyclohexane/EtOAc 5/1) to give lactone *rac*-**10o** (83 mg, 330  $\mu\text{mol}$ , 97%) as a colorless oil.

All physical data was in accordance with the one reported above. No optical rotation was observed. HPLC analysis on chiral stationary phase {Daicel Chiralpak IA, *n*-heptane/2-propanol 80/20, 1.0 mL/min, 30 °C, UV 230 nm,  $t_{\text{ret}}$ (enantiomer 1) = 6.7 min,  $t_{\text{ret}}$ (enantiomer 2) = 7.4 min}:  $t_{\text{ret}}$ (major isomer) = 6.7 min, 3% ee.

Crystallization of **10o**.

Crystals of lactone **10o** were grown from diethylether/pentane (1/1) at room temperature over 1 d: Compound **10o** [70 mg of (*R*)-**10o** and 75 mg *rac*-**10o**] was dissolved in diethylether (ca. 500  $\mu\text{L}$ ) and the solution was covered by a layer of pentane (ca. 500  $\mu\text{L}$ ). The crystallization was induced by slow diffusion of the pentane into the solution of **10o** and crystalline material was obtained the next day. Two samples were crystallized and three crystal structures determined:

*rac*-**10o**: *rac*-**10o**-Cry1, 50% ee [(*S*)-enantiomer] for the picked single crystal.

*rac*-**10o**-Cry2, 98% ee [(*S*)-enantiomer] for the picked single crystal.

(*R*)-**10o**: (*R*)-**10o**-Cry1, > 99% ee [(*R*)-enantiomer] for the picked single crystal.

Each single crystal was redissolved in 2-PrOH and subjected to HPLC-UV analysis on a chiral stationary phase after the structure elucidation (see HPLC data below).

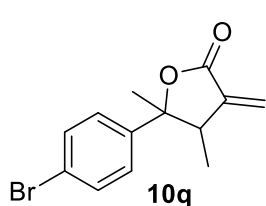

5-(4-bromophenyl)-4,5-dimethyl-3-methylenedihydrofuran-2(3H)-one (**10q**).

Compound **8q** (12.6 mg, 34.0  $\mu$ mol) was treated with *para*-toluenesulfonic acid (2.0 mg, 11  $\mu$ mol) in  $\text{CHCl}_3$  (500  $\mu$ L) at room temperature for 16 h. The reaction mixture was quenched with brine (5 mL), extracted with  $\text{CHCl}_3$  (3 x 10 mL), the combined organic phase was dried over  $\text{Na}_2\text{SO}_4$ , filtered and concentrated. The crude product was purified via flash chromatography (silica gel, cyclohexane/EtOAc 10/1) to give lactone **10q** (3.1 mg, 30  $\mu$ mol, 88%).

$[\alpha]_D^{20} = -10.0$  ( $c = 0.3$ , Me);  $^1\text{H-NMR}$  (300.13 MHz,  $\text{CDCl}_3$ ): 7.51 – 7.46 (m, 2H), 7.13 – 7.08 (m, 2H), 6.28 (d,  $J = 2.7$  Hz, 1H), 5.52 (d,  $J = 2.4$  Hz, 1H), 3.08 (qt,  $J_1 = 7.0$ ,  $J_2 = 2.5$  Hz, 1H), 1.78 (s, 3H), 0.79 (d,  $J = 7.0$  Hz, 3H);  $^{13}\text{C-NMR}$  (75.47 MHz,  $\text{CDCl}_3$ ): 170.0, 141.0, 139.6, 131.6, 127.2, 122.1, 122.0, 87.1, 46.0, 28.3, 16.5; IR (film)  $\tilde{\nu} = 1759, 1489, 1451, 1396, 1379, 1255, 1194, 1110, 1074, 1057, 1007, 938, 823, 813, 737, 503$ ; HPLC analysis on chiral stationary phase {Daicel Chiralcel OJ, *n*-heptane/2-propanol 85/15, 0.7 mL/min, 20  $^\circ\text{C}$ , UV 230 nm,  $t_{\text{ret}}$ (enantiomer 1) = 14.5 min,  $t_{\text{ret}}$ (enantiomer 2) = 18.5 min}:  $t_{\text{ret}}$ (major isomer) = 18.5 min, 75% ee; HRMS(ESI):  $m/z$ : calc. for  $\text{C}_{13}\text{H}_{14}\text{O}_2\text{Br}^+$ : 281.0172  $[\text{M}+\text{H}]^+$ , found: 281.0174.

## Investigations of the origin of the switch and the responsible structural motif

General procedure for the asymmetric allylation of ketones with the lactone based organozinc reagent.

The lactone-based organozinc reagent was prepared according to literature.<sup>11</sup>

A 20 mL microwave-tube (Biotage) was charged with zinc dust (164.0 mg, 2.5 mmol, 5 eq.),  $\text{NH}_4\text{Cl}$  (215.0 mg, 4.0 mmol, 8 eq.) and (*R*)-3,3'-bis(2,4,6-triisopropylphenyl)-1,1'-binaphthyl-2,2'-diyl hydrogenphosphate (TRIP, 37.8 mg, 50.2  $\mu$ mol, 0.1 eq.) followed by toluene (5.0 mL). The 4-bromobenzaldehyde or 4-bromoacetophenone (502  $\mu$ mol) and 3-(bromomethyl)furan-2(5*H*)-one **18** (89.0 mg, 502  $\mu$ mol, 1 eq.) were added. The vial was sealed with a crimp-cap and the mixture was stirred (720 rpm) at room temperature for 16 h, quenched by the addition of  $\text{NH}_4\text{Cl}_{\text{sat., aq}}$  solution (25 mL) and extracted with EtOAc (3 x 50 mL). The combined organic phase was dried over  $\text{Na}_2\text{SO}_4$ , filtered and concentrated under reduced pressure. The obtained crude product was purified via preparative HPLC according to following procedure to give the pure product:

A Shimadzu prominence preparative liquid chromatograph system equipped with a 250 x 21.2 mm Phenomenex Luna C18(2) 100  $\text{\AA}$  column and a Shimadzu SPD-M20A PDA detector was used. The pure product was obtained running a gradient from 10% MeCN in  $\text{H}_2\text{O}$  to 100% MeCN over 23 min with a flow of 30 mL/min. The sample fractioning was done manually.

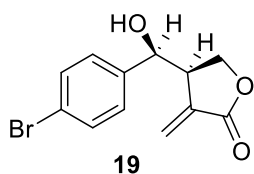

4-[(4-bromophenyl)(hydroxy)methyl]-3-methylenedihydrofuran-2(3H)-one (**19**).

4-Bromobenzaldehyde (93.0 mg, 502  $\mu\text{mol}$ , 1 eq.); yield: 48.0 mg, 169  $\mu\text{mol}$ , 34%, colorless oil;  $[\alpha]_{\text{D}}^{20} = +11.1$  ( $c = 0.9$ ,  $\text{CHCl}_3$ );  $^1\text{H-NMR}$  (300.13 MHz,  $\text{CDCl}_3$ ): 7.56–7.50 (m, 2H), 7.25–7.20 (m, 2H), 6.37 (d,  $J = 2.2$ , 1H), 5.75 (d,  $J = 1.9$ , 1H), 4.71 (d,  $J = 7.4$ , 1H), 4.21 (d,  $J = 8.3$ , 0.4H), 4.18 (d,  $J = 8.2$ , 0.6H), 4.09 (d,  $J = 4.1$ , 0.6H), 4.06 (d,  $J = 4.1$ , 0.4H), 3.41–3.33 (m, 1H), 2.04 (bs, 1H);  $^{13}\text{C-NMR}$  (75.47 MHz,  $\text{CDCl}_3$ ): 170.7, 139.7, 134.7, 132.1 (2C), 128.4 (2C), 125.8, 122.7, 75.1, 67.6, 45.5; IR (film)  $\tilde{\nu} = 3434$  (br), 2974, 2912, 1741, 1657, 1591, 1486, 1401, 1317, 1271, 1210, 1188, 1116, 1070, 1009, 949, 909, 818, 730, 623  $\text{cm}^{-1}$ ; HPLC analysis on chiral stationary phase {Daicel Chiralpak IE, *n*-heptane/2-propanol 90/10, 0.7 mL/min, 10  $^\circ\text{C}$ , UV 230 nm,  $t_{\text{ret}}$ (enantiomer 1) = 33.3 min,  $t_{\text{ret}}$ (enantiomer 2) = 43.6 min}:  $t_{\text{ret}}$ (major isomer) = 43.0 min, 93% ee; HRMS(ESI):  $m/z$ : calc. for  $\text{C}_{12}\text{H}_{12}\text{BrO}_3^+$ : 282.9965 and 284.9944  $[\text{M}+\text{H}]^+$ , found: 282.9964 and 284.9945 (for the two most prominent isotopes).

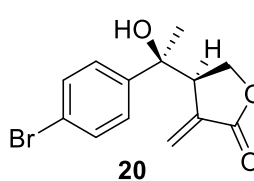

4-[1-(4-bromophenyl)-1-hydroxyethyl]-3-methylenedihydrofuran-2(3H)-one (**20**).

4-Bromoacetophenone (100.0 mg, 502  $\mu\text{mol}$ , 1 eq.); yield: 10.4 mg, 35.0  $\mu\text{mol}$ , 7%, colorless oil;  $[\alpha]_{\text{D}}^{20} = +35.7$  ( $c = 1.05$ ,  $\text{CHCl}_3$ );  $^1\text{H-NMR}$  (300.13 MHz,  $\text{CDCl}_3$ ): 7.54–7.47 (m, 2H), 7.34–7.28 (s, 2H), 6.27 (d,  $J = 2.3$ , 1H), 5.27 (d,  $J = 1.9$ , 1H), 4.37 (d,  $J = 4.0$ , 0.3H), 4.34 (d,  $J = 4.0$ , 0.7H), 4.30 (d,  $J = 8.0$ , 0.7H), 4.26 (d,  $J = 8.1$ , 0.3H), 3.44–3.38 (m, 1H), 2.01 (bs, 1H), 1.58 (s, 3H).  $^{13}\text{C-NMR}$  (75.47 MHz,  $\text{CDCl}_3$ ): 170.8, 143.8, 134.5, 131.8 (2C), 127.3 (2C), 125.9, 122.0, 104.1 (rotamer 1), 103.1 (rotamer 2), 75.5, 67.1, 49.3, 26.3, 18.6 (rotamer 1), 18.2 (rotamer 2); IR (film)  $\tilde{\nu} = 3415$  (br), 2993, 2939, 1744, 1488, 1446, 1395, 1375, 1319, 1277, 1243, 1221, 1127, 1078, 1041, 1008, 953, 823, 752  $\text{cm}^{-1}$ ; HPLC analysis on chiral stationary phase {Daicel Chiralpak IA, *n*-heptane/2-propanol 85/15, 0.7 mL/min, 18  $^\circ\text{C}$ , UV 230 nm,  $t_{\text{ret}}$ (enantiomer 1) = 13.7 min,  $t_{\text{ret}}$ (enantiomer 2) = 15.6 min}:  $t_{\text{ret}}$ (major isomer) = 13.7 min, 97% ee; HRMS(ESI):  $m/z$ : calc. for  $\text{C}_{13}\text{H}_{14}\text{BrO}_3^+$ : 297.0121 and 299.0101  $[\text{M}+\text{H}]^+$ , found: 297.0125 and 299.0107 (for the two most prominent isotopes).

Racemic reference material for HPLC analysis on a chiral stationary phase was prepared according to procedure D with diphenylphosphate instead of TRIP catalyst in toluene/1,2-dimethoxyethane 1:1 at 70  $^\circ\text{C}$  under otherwise identical conditions: *tert.* alcohol **20**: 3.3 mg, 11.1  $\mu\text{mol}$ , 2.2%; *sec.* alcohol **19**: 107 mg, 378  $\mu\text{mol}$ , 75%.

## CD spectra of compounds **19** and **20**.

The CD spectra were recorded on a Jasco J-1500 CD Spectrometer instrument. The spectra determined from 190-350 nm at 20 °C in a 1 mm quartz cuvette. The samples were dissolved in MeOH (final concentration: 1.0 mg/mL).

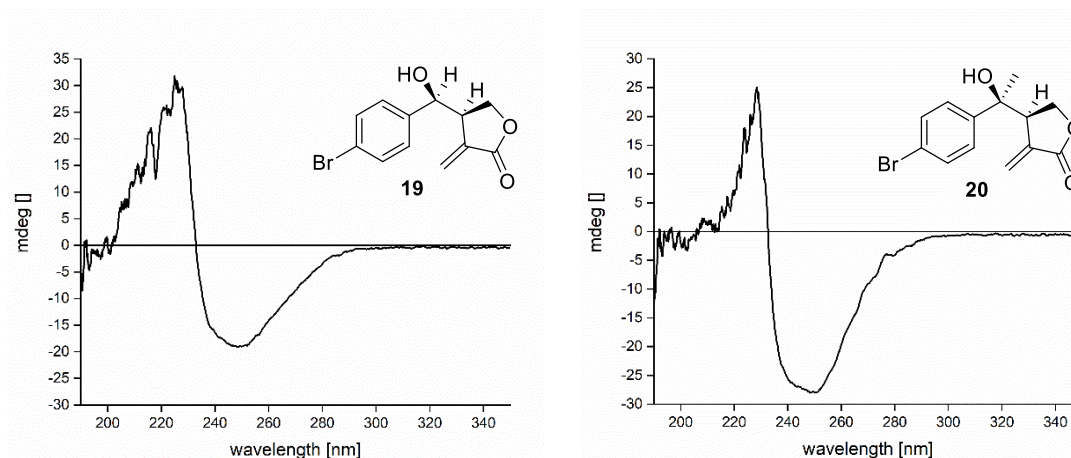

## Crystal Structure Determination of **10o**.

### *rac*-**10o**-Cry1

**Crystal Structure Determination of *rac*-**10o**-Cry1.** All the measurements were performed using monochromatized Mo K $\alpha$  radiation at 100K: C<sub>13</sub>H<sub>11</sub>ClO<sub>3</sub>, *M<sub>r</sub>* 250.67, orthorhombic, space group P 2<sub>1</sub> 2<sub>1</sub> 2<sub>1</sub>, *a* = 6.4316(4)Å, *b* = 7.3722(5)Å, *c* = 23.2745(14)Å, *V* = 1103.56(12)Å<sup>3</sup>, *Z* = 4, *d*<sub>calc</sub> = 1.509g cm<sup>-3</sup>,  $\mu$  = 0.338mm<sup>-1</sup>. A total of 21090 reflections were collected ( $\Theta_{\max}$  = 40.0°), from which 6826 were unique (*R*<sub>int</sub> = 0.0263), with 6475 having *I* > 2 $\sigma$ (*I*). The structure was solved by direct methods (SHELXS-97)<sup>7</sup> and refined by full-matrix least-squares techniques against *F*<sup>2</sup> (SHELXL-2014/6)<sup>8</sup>. The non-hydrogen atoms were refined with anisotropic displacement parameters without any constraints. The absolute configuration was established by anomalous dispersion effects in the diffraction measurements on the crystal. The structure was refined as a 2-component inversion twin resulting in a scale factor of 0.32(4) for the fractional contribution of the less prominent twin component [hence 32(4)% (4*R*)-enantiomer]. The H atoms of the terminal CH<sub>2</sub> group were refined with a common isotropic displacement parameter and idealized geometry with the hydrogen atoms in the plane through the atoms C13, C15, C16 and C–H distances of 0.95Å. The H atoms of the other CH<sub>2</sub> groups were refined with common isotropic displacement parameters for the H atoms of the same group and idealized geometry with approximately tetrahedral angles and C–H distances of 0.99Å. The H atoms of the phenyl ring were put at the external bisectors of the C–C–C angles at C–H distances of 0.95Å and a common isotropic displacement parameter was refined for these H atoms. For 160 parameters final *R* indices of *R*<sub>1</sub> = 0.0294 and *wR*<sup>2</sup> = 0.0792 (GOF = 1.088) were obtained. The largest peak in a difference Fourier map was 0.531eÅ<sup>-3</sup>.

## Results and Discussion



**Crystal Structure.** The crystal structure analysis of *rac*-**10o**-Cry1 confirmed the compound as (4*S*/4*R*)-6-chloro-4'-methylene-2,3,3',4'-tetrahydro-5'*H*-spiro[chromene-4,2'-furan]-5'-one [4*S*:4*R* = 68(4):32(4)%]. All atoms lie on general positions. The determination of the absolute configuration from anomalous dispersion effects resulted in a Flack-parameter<sup>9</sup> of 0.32(4), hence in an enantiomeric ratio (4*S*):(4*R*) of 68(4):32(4)% .

**Table SI01.** Crystal data and structure refinement for *rac*-**10o**-Cry1.

|                                       |                                                                       |
|---------------------------------------|-----------------------------------------------------------------------|
| Crystal data                          |                                                                       |
| CCDC number                           | 1944605                                                               |
| Identification code                   | FE111                                                                 |
| Empirical formula                     | C <sub>13</sub> H <sub>11</sub> ClO <sub>3</sub>                      |
| Formula weight                        | 250.67                                                                |
| Crystal description                   | block, colourless                                                     |
| Crystal size                          | 0.43 x 0.35 x 0.32mm                                                  |
| Crystal system, space group           | orthorhombic, P 2 <sub>1</sub> 2 <sub>1</sub> 2 <sub>1</sub>          |
| Unit cell dimensions:                 |                                                                       |
| a                                     | 6.4316(4)Å                                                            |
| b                                     | 7.3722(5)Å                                                            |
| c                                     | 23.2745(14)Å                                                          |
| Volume                                | 1103.56(12)Å <sup>3</sup>                                             |
| Z                                     | 4                                                                     |
| Calculated density                    | 1.509Mg/m <sup>3</sup>                                                |
| F(000)                                | 520                                                                   |
| Linear absorption coefficient $\mu$   | 0.338mm <sup>-1</sup>                                                 |
| Absorption correction                 | semi-empirical from equivalents                                       |
| Max. and min. transmission            | 1.000 and 0.870                                                       |
| Unit cell determination               | 2.90° < $\Theta$ < 40.72°<br>9936 reflections used at 100K            |
| Data collection                       |                                                                       |
| Temperature                           | 100K                                                                  |
| Diffractometer                        | Bruker APEX-II CCD                                                    |
| Radiation source                      | Incoatec microfocus sealed tube                                       |
| Radiation and wavelength              | MoK $\alpha$ , 0.71073Å                                               |
| Monochromator                         | multilayer monochromator                                              |
| Scan type                             | $\phi$ and $\omega$ scans                                             |
| $\Theta$ range for data collection    | 2.90 to 40.00°                                                        |
| Reflections collected / unique        | 21090 / 6826                                                          |
| Significant unique reflections        | 6475 with I > 2 $\sigma$ (I)                                          |
| R(int), R(sigma)                      | 0.0263, 0.0266                                                        |
| Completeness to $\Theta = 40.0^\circ$ | 99.9%                                                                 |
| Refinement                            |                                                                       |
| Refinement method                     | Full-matrix least-squares on F <sup>2</sup>                           |
| Data / parameters / restraints        | 6826 / 160 / 0                                                        |
| Goodness-of-fit on F <sup>2</sup>     | 1.088                                                                 |
| Final R indices [I > 2 $\sigma$ (I)]  | R1 = 0.0294, wR2 = 0.0777                                             |
| R indices (all data)                  | R1 = 0.0317, wR2 = 0.0792                                             |
| Absolute structure parameter          | 0.32(4)                                                               |
| Extinction expression                 | none                                                                  |
| Weighting scheme                      | w = 1/[\mathbf{\sigma}^2(F_o^2)+(aP)^2+bP] where P = (F_o^2+2F_c^2)/3 |
| Weighting scheme parameters a, b      | 0.0471, 0.0547                                                        |
| Largest $\Delta/\sigma$ in last cycle | 0.003                                                                 |
| Largest difference peak and hole      | 0.531 and -0.185e/Å <sup>3</sup>                                      |
| Structure Solution Program            | SHELXS-97 (Sheldrick, 2008)                                           |
| Structure Refinement Program          | SHELXL-2014/6 (Sheldrick, 2015)                                       |



**Table S102.** Atomic coordinates and equivalent isotropic displacement parameters ( $\text{\AA}^2$ ) for *rac-10o-Cry1*.  $U_{\text{eq}}$  is defined as one third of the trace of the orthogonalized  $U_{ij}$  tensor.

|     | x           | y           | z          | $U_{\text{eq}}$ |
|-----|-------------|-------------|------------|-----------------|
| O1  | 0.77565(12) | 0.80027(11) | 0.62041(3) | 0.01506(12)     |
| C2  | 0.78949(17) | 0.69698(14) | 0.56812(4) | 0.01565(16)     |
| C3  | 0.73056(15) | 0.50165(14) | 0.57929(4) | 0.01383(14)     |
| C4  | 0.50451(14) | 0.48750(11) | 0.59804(3) | 0.00955(12)     |
| C5  | 0.27255(14) | 0.63032(12) | 0.67393(4) | 0.01031(12)     |
| C6  | 0.23722(13) | 0.75848(13) | 0.71613(3) | 0.01102(12)     |
| C7  | 0.38129(15) | 0.89646(13) | 0.72690(4) | 0.01244(14)     |
| C8  | 0.55946(15) | 0.90539(13) | 0.69379(4) | 0.01250(14)     |
| C9  | 0.59593(14) | 0.77814(11) | 0.65027(3) | 0.01046(13)     |
| C10 | 0.45492(13) | 0.63619(11) | 0.64077(3) | 0.00915(12)     |
| O11 | 0.37416(11) | 0.51686(10) | 0.54675(3) | 0.01185(11)     |
| C13 | 0.44875(15) | 0.29384(12) | 0.61895(4) | 0.01082(13)     |
| C14 | 0.25983(14) | 0.24392(13) | 0.58499(3) | 0.01101(12)     |
| C15 | 0.23734(14) | 0.38040(12) | 0.53844(3) | 0.01051(13)     |
| O15 | 0.11852(12) | 0.38056(11) | 0.49804(3) | 0.01497(13)     |
| C16 | 0.12672(17) | 0.10704(15) | 0.59140(4) | 0.01805(17)     |
| Cl1 | 0.01630(4)  | 0.74311(3)  | 0.75900(2) | 0.01614(5)      |

**Table S103.** Hydrogen coordinates and isotropic displacement parameters ( $\text{\AA}^2$ ) for *rac-10o-Cry1*.

|      | x      | y      | z      | $U_{\text{iso}}$ |
|------|--------|--------|--------|------------------|
| H21  | 0.9332 | 0.7027 | 0.5530 | 0.022(3)         |
| H22  | 0.6951 | 0.7494 | 0.5389 | 0.022(3)         |
| H31  | 0.8215 | 0.4510 | 0.6096 | 0.018(3)         |
| H32  | 0.7518 | 0.4296 | 0.5439 | 0.018(3)         |
| H5   | 0.1728 | 0.5376 | 0.6673 | 0.022(3)         |
| H7   | 0.3571 | 0.9827 | 0.7565 | 0.022(3)         |
| H8   | 0.6581 | 0.9988 | 0.7006 | 0.022(3)         |
| H131 | 0.5641 | 0.2083 | 0.6113 | 0.023(3)         |
| H132 | 0.4182 | 0.2934 | 0.6606 | 0.023(3)         |
| H161 | 0.0128 | 0.0943 | 0.5657 | 0.030(4)         |
| H162 | 0.1457 | 0.0221 | 0.6216 | 0.030(4)         |

**Table SI04.** Anisotropic displacement parameters ( $\text{\AA}^2$ ) for *rac-10o-Cry1*. The anisotropic displacement factor exponent takes the form:  $-2\pi^2[h^2 a^{*2}U_{11} + \dots + 2 h k a^* b^* U_{12}]$ .

|     | $U_{11}$   | $U_{22}$   | $U_{33}$   | $U_{23}$    | $U_{13}$   | $U_{12}$   |
|-----|------------|------------|------------|-------------|------------|------------|
| O1  | 0.0132(3)  | 0.0148(3)  | 0.0172(3)  | -0.0027(2)  | 0.0037(2)  | -0.0063(2) |
| C2  | 0.0163(4)  | 0.0160(4)  | 0.0146(3)  | -0.0007(3)  | 0.0044(3)  | -0.0049(3) |
| C3  | 0.0117(3)  | 0.0133(3)  | 0.0165(3)  | -0.0021(3)  | 0.0028(3)  | -0.0014(3) |
| C4  | 0.0105(3)  | 0.0090(3)  | 0.0092(2)  | -0.0001(2)  | -0.0009(2) | -0.0016(3) |
| C5  | 0.0104(3)  | 0.0090(3)  | 0.0116(3)  | -0.0003(2)  | 0.0002(2)  | -0.0008(2) |
| C6  | 0.0111(3)  | 0.0105(3)  | 0.0115(3)  | 0.0001(2)   | 0.0004(2)  | 0.0015(3)  |
| C7  | 0.0146(4)  | 0.0103(3)  | 0.0125(3)  | -0.0022(2)  | -0.0019(3) | 0.0014(3)  |
| C8  | 0.0134(3)  | 0.0098(3)  | 0.0143(3)  | -0.0017(2)  | -0.0025(3) | -0.0020(3) |
| C9  | 0.0108(3)  | 0.0088(3)  | 0.0117(3)  | 0.0002(2)   | -0.0003(2) | -0.0024(2) |
| C10 | 0.0096(3)  | 0.0083(3)  | 0.0095(2)  | 0.0001(2)   | -0.0005(2) | -0.0012(2) |
| O11 | 0.0154(3)  | 0.0106(3)  | 0.0096(2)  | 0.00120(18) | -0.0027(2) | -0.0031(2) |
| C13 | 0.0131(3)  | 0.0084(3)  | 0.0110(3)  | 0.0004(2)   | -0.0012(2) | -0.0008(2) |
| C14 | 0.0124(3)  | 0.0099(3)  | 0.0107(2)  | -0.0004(2)  | 0.0003(2)  | -0.0019(3) |
| C15 | 0.0110(3)  | 0.0107(3)  | 0.0098(3)  | -0.0013(2)  | 0.0004(2)  | -0.0010(3) |
| O15 | 0.0144(3)  | 0.0181(3)  | 0.0124(2)  | -0.0008(2)  | -0.0039(2) | -0.0013(2) |
| C16 | 0.0184(4)  | 0.0169(4)  | 0.0189(4)  | 0.0032(3)   | -0.0023(3) | -0.0080(3) |
| Cl1 | 0.01533(9) | 0.01483(9) | 0.01825(9) | -0.00059(7) | 0.00599(7) | 0.00253(8) |

CCDC 1944605 contains the supplementary crystallographic data for this structure. This data can be obtained free of charge via <http://www.ccdc.cam.ac.uk/conts/retrieving.html> (or from the CCDC, 12 Union Road, Cambridge CB2 1EZ, UK; Fax: +44 1223 336033; E-mail: [deposit@ccdc.cam.ac.uk](mailto:deposit@ccdc.cam.ac.uk)).

**Table S105.** Full list of bond lengths [Å] and angles [°] for *rac*-**10o**-Cry1.

|            |            |                 |             |
|------------|------------|-----------------|-------------|
| O1-C9      | 1.3586(11) | O1-C9-C10       | 124.00(8)   |
| O1-C2      | 1.4383(12) | C8-C9-C10       | 120.37(8)   |
| C2-C3      | 1.5116(15) | C9-C10-C5       | 118.45(7)   |
| C2-H21     | 0.99       | C9-C10-C4       | 120.51(7)   |
| C2-H22     | 0.99       | C5-C10-C4       | 120.96(7)   |
| C3-C4      | 1.5215(13) | C15-O11-C4      | 112.15(7)   |
| C3-H31     | 0.99       | C14-C13-C4      | 104.39(7)   |
| C3-H32     | 0.99       | C14-C13-H131    | 110.9       |
| C4-O11     | 1.4747(10) | C4-C13-H131     | 110.9       |
| C4-C10     | 1.5140(11) | C14-C13-H132    | 110.9       |
| C4-C13     | 1.5504(12) | C4-C13-H132     | 110.9       |
| C5-C6      | 1.3817(12) | H131-C13-H132   | 108.9       |
| C5-C10     | 1.4047(12) | C16-C14-C15     | 122.16(8)   |
| C5-H5      | 0.95       | C16-C14-C13     | 130.50(9)   |
| C6-C7      | 1.3987(13) | C15-C14-C13     | 107.33(7)   |
| C6-C11     | 1.7400(9)  | O15-C15-O11     | 121.43(8)   |
| C7-C8      | 1.3826(14) | O15-C15-C14     | 128.90(9)   |
| C7-H7      | 0.95       | O11-C15-C14     | 109.67(7)   |
| C8-C9      | 1.4003(12) | C14-C16-H161    | 120.0       |
| C8-H8      | 0.95       | C14-C16-H162    | 120.0       |
| C9-C10     | 1.4024(12) | H161-C16-H162   | 120.0       |
| O11-C15    | 1.3505(11) |                 |             |
| C13-C14    | 1.4956(12) |                 |             |
| C13-H131   | 0.99       | C9-O1-C2-C3     | -48.83(12)  |
| C13-H132   | 0.99       | O1-C2-C3-C4     | 63.85(11)   |
| C14-C16    | 1.3318(14) | C2-C3-C4-O11    | 74.18(9)    |
| C14-C15    | 1.4855(13) | C2-C3-C4-C10    | -42.88(10)  |
| C15-O15    | 1.2116(11) | C2-C3-C4-C13    | -171.05(7)  |
| C16-H161   | 0.95       | C10-C5-C6-C7    | -0.06(13)   |
| C16-H162   | 0.95       | C10-C5-C6-C11   | -177.05(6)  |
|            |            | C5-C6-C7-C8     | 1.24(13)    |
| C9-O1-C2   | 114.95(7)  | C11-C6-C7-C8    | 178.26(7)   |
| O1-C2-C3   | 110.08(8)  | C6-C7-C8-C9     | -0.24(14)   |
| O1-C2-H21  | 109.6      | C2-O1-C9-C8     | -166.40(8)  |
| C3-C2-H21  | 109.6      | C2-O1-C9-C10    | 15.47(13)   |
| O1-C2-H22  | 109.6      | C7-C8-C9-O1     | 179.87(8)   |
| C3-C2-H22  | 109.6      | C7-C8-C9-C10    | -1.94(13)   |
| H21-C2-H22 | 108.2      | O1-C9-C10-C5    | -178.90(8)  |
| C2-C3-C4   | 110.75(8)  | C8-C9-C10-C5    | 3.06(12)    |
| C2-C3-H31  | 109.5      | O1-C9-C10-C4    | 4.42(13)    |
| C4-C3-H31  | 109.5      | C8-C9-C10-C4    | -173.62(8)  |
| C2-C3-H32  | 109.5      | C6-C5-C10-C9    | -2.08(12)   |
| C4-C3-H32  | 109.5      | C6-C5-C10-C4    | 174.59(8)   |
| H31-C3-H32 | 108.1      | O11-C4-C10-C9   | -106.33(8)  |
| O11-C4-C10 | 107.80(7)  | C3-C4-C10-C9    | 10.56(10)   |
| O11-C4-C3  | 107.52(6)  | C13-C4-C10-C9   | 137.43(8)   |
| C10-C4-C3  | 109.88(7)  | O11-C4-C10-C5   | 77.07(9)    |
| O11-C4-C13 | 104.94(6)  | C3-C4-C10-C5    | -166.04(8)  |
| C10-C4-C13 | 114.31(6)  | C13-C4-C10-C5   | -39.17(11)  |
| C3-C4-C13  | 111.98(8)  | C10-C4-O11-C15  | -115.59(8)  |
| C6-C5-C10  | 120.45(8)  | C3-C4-O11-C15   | 126.00(8)   |
| C6-C5-H5   | 119.8      | C13-C4-O11-C15  | 6.63(9)     |
| C10-C5-H5  | 119.8      | O11-C4-C13-C14  | -11.31(8)   |
| C5-C6-C7   | 121.05(8)  | C10-C4-C13-C14  | 106.58(8)   |
| C5-C6-C11  | 119.83(7)  | C3-C4-C13-C14   | -127.64(8)  |
| C7-C6-C11  | 119.05(7)  | C4-C13-C14-C16  | -167.92(10) |
| C8-C7-C6   | 118.93(8)  | C4-C13-C14-C15  | 12.08(9)    |
| C8-C7-H7   | 120.5      | C4-O11-C15-O15  | -179.36(8)  |
| C6-C7-H7   | 120.5      | C4-O11-C15-C14  | 1.03(10)    |
| C7-C8-C9   | 120.68(8)  | C16-C14-C15-O15 | -8.20(16)   |
| C7-C8-H8   | 119.7      | C13-C14-C15-O15 | 171.79(9)   |
| C9-C8-H8   | 119.7      | C16-C14-C15-O11 | 171.37(9)   |
| O1-C9-C8   | 115.60(8)  | C13-C14-C15-O11 | -8.64(10)   |

All the measurements were performed using monochromatized Mo  $K_{\alpha}$  radiation at 100K:  $C_{13}H_{11}ClO_3$ ,  $M_r$  250.67, orthorhombic, space group  $P 2_1 2_1 2_1$ ,  $a = 6.4281(3)\text{\AA}$ ,  $b = 7.3763(3)\text{\AA}$ ,  $c = 23.3211(9)\text{\AA}$ ,  $V = 1105.78(8)\text{\AA}^3$ ,  $Z = 4$ ,  $d_{\text{calc}} = 1.506\text{g cm}^{-3}$ ,  $\mu = 0.337\text{mm}^{-1}$ . A total of 20844 reflections were collected ( $\Theta_{\text{max}} = 39.9^\circ$ ), from which 6851 were unique ( $R_{\text{int}} = 0.0267$ ), with 6631 having  $I > 2\sigma(I)$ . The structure was solved by direct methods (SHELXS-97)<sup>7</sup> and refined by full-matrix least-squares techniques against  $F^2$  (SHELXL-2014/6)<sup>8</sup>. The non-hydrogen atoms were refined with anisotropic displacement parameters without any constraints. The absolute configuration was established by anomalous dispersion effects in the diffraction measurements on the crystal. The H atoms of the terminal  $\text{CH}_2$  group were refined with a common isotropic displacement parameter and idealized geometry with the hydrogen atoms in the plane through the atoms C13, C15, C16 and C–H distances of  $0.95\text{\AA}$ . The H atoms of the other  $\text{CH}_2$  groups were refined with common isotropic displacement parameters for the H atoms of the same group and idealized geometry with approximately tetrahedral angles and C–H distances of  $0.99\text{\AA}$ . The H atoms of the phenyl ring were put at the external bisectors of the C–C–C angles at C–H distances of  $0.95\text{\AA}$  and a common isotropic displacement parameter was refined for these H atoms. For 159 parameters final  $R$  indices of  $R_1 = 0.0269$  and  $wR^2 = 0.0738$  (GOF = 1.135) were obtained. The largest peak in a difference Fourier map was  $0.500\text{e}\text{\AA}^{-3}$ .

## Results and Discussion

**Crystal Structure.** The crystal structure analysis of *rac-10o-Cry2* confirmed the compound as (4*S*)-6-chloro-4'-methylene-2,3,3',4'-tetrahydro-5'*H*-spiro[chromene-4,2'-furan]-5'-one. All atoms lie on general positions (s. Fig. SI01). The determination of the absolute configuration from anomalous dispersion effects resulted in a Flack-parameter<sup>9</sup> of 0.03(4).

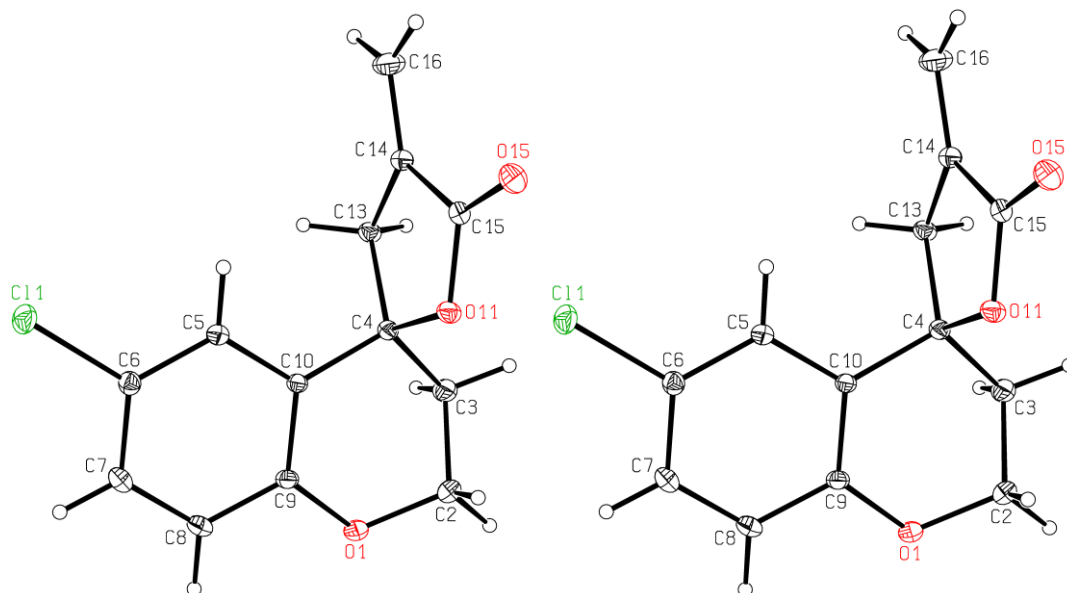

**Figure SI01.** Stereoscopic ORTEP<sup>10</sup> plot of *rac-10o-Cry2* showing the atomic numbering scheme. The probability ellipsoids are drawn at the 50% probability level. The H atoms are drawn with arbitrary radii.

**Table SI06.** Crystal data and structure refinement for *rac*-**10o**-Cry2.

|                                        |                                                                        |
|----------------------------------------|------------------------------------------------------------------------|
| Crystal data                           |                                                                        |
| CCDC number                            | 1944606                                                                |
| Identification code                    | FE111B                                                                 |
| Empirical formula                      | C <sub>13</sub> H <sub>11</sub> ClO <sub>3</sub>                       |
| Formula weight                         | 250.67                                                                 |
| Crystal description                    | block, colourless                                                      |
| Crystal size                           | 0.44 x 0.44 x 0.35mm                                                   |
| Crystal system, space group            | orthorhombic, P 2 <sub>1</sub> 2 <sub>1</sub> 2 <sub>1</sub>           |
| Unit cell dimensions:                  |                                                                        |
| a                                      | 6.4281(3)Å                                                             |
| b                                      | 7.3763(3)Å                                                             |
| c                                      | 23.3211(9)Å                                                            |
| Volume                                 | 1105.78(8)Å <sup>3</sup>                                               |
| Z                                      | 4                                                                      |
| Calculated density                     | 1.506Mg/m <sup>3</sup>                                                 |
| F(000)                                 | 520                                                                    |
| Linear absorption coefficient $\mu$    | 0.337mm <sup>-1</sup>                                                  |
| Absorption correction                  | semi-empirical from equivalents                                        |
| Max. and min. transmission             | 1.000 and 0.880                                                        |
| Unit cell determination                | 2.76° < $\Theta$ < 40.66°<br>9939 reflections used at 100K             |
| Data collection                        |                                                                        |
| Temperature                            | 100K                                                                   |
| Diffractometer                         | Bruker APEX-II CCD                                                     |
| Radiation source                       | Incoatec microfocus sealed tube                                        |
| Radiation and wavelength               | MoK $\alpha$ , 0.71073Å                                                |
| Monochromator                          | multilayer monochromator                                               |
| Scan type                              | $\phi$ and $\omega$ scans                                              |
| $\Theta$ range for data collection     | 2.90 to 39.99°                                                         |
| Reflections collected / unique         | 20844 / 6851                                                           |
| Significant unique reflections         | 6631 with $I > 2\sigma(I)$                                             |
| R(int), R(sigma)                       | 0.0267, 0.0269                                                         |
| Completeness to $\Theta = 39.99^\circ$ | 99.9%                                                                  |
| Refinement                             |                                                                        |
| Refinement method                      | Full-matrix least-squares on F <sup>2</sup>                            |
| Data / parameters / restraints         | 6851 / 159 / 0                                                         |
| Goodness-of-fit on F <sup>2</sup>      | 1.135                                                                  |
| Final R indices [ $I > 2\sigma(I)$ ]   | R1 = 0.0269, wR2 = 0.0732                                              |
| R indices (all data)                   | R1 = 0.0281, wR2 = 0.0738                                              |
| Absolute structure parameter           | 0.03(4)                                                                |
| Extinction expression                  | none                                                                   |
| Weighting scheme                       | $w = 1/[\sigma^2(F_o^2) + (aP)^2 + bP]$ where $P = (F_o^2 + 2F_c^2)/3$ |
| Weighting scheme parameters a, b       | 0.0396, 0.0669                                                         |
| Largest $\Delta/\sigma$ in last cycle  | 0.003                                                                  |
| Largest difference peak and hole       | 0.500 and -0.294e/Å <sup>3</sup>                                       |
| Structure Solution Program             | SHELXS-97 (Sheldrick, 2008)                                            |
| Structure Refinement Program           | SHELXL-2014/6 (Sheldrick, 2015)                                        |

**Table S107.** Atomic coordinates and equivalent isotropic displacement parameters ( $\text{\AA}^2$ ) for *rac*-**10o**-Cry2.  $U_{\text{eq}}$  is defined as one third of the trace of the orthogonalized  $U_{ij}$  tensor.

|     | x           | y           | z          | $U_{\text{eq}}$ |
|-----|-------------|-------------|------------|-----------------|
| O1  | 0.77586(12) | 0.80028(9)  | 0.62044(3) | 0.01466(12)     |
| C2  | 0.78972(16) | 0.69701(13) | 0.56815(4) | 0.01513(15)     |
| C3  | 0.73090(14) | 0.50160(12) | 0.57930(4) | 0.01346(14)     |
| C4  | 0.50481(13) | 0.48715(10) | 0.59799(3) | 0.00916(11)     |
| C5  | 0.27257(13) | 0.62994(10) | 0.67389(4) | 0.00999(12)     |
| C6  | 0.23736(13) | 0.75832(11) | 0.71614(3) | 0.01064(11)     |
| C7  | 0.38151(14) | 0.89615(11) | 0.72695(4) | 0.01218(13)     |
| C8  | 0.55959(14) | 0.90533(11) | 0.69376(4) | 0.01212(13)     |
| C9  | 0.59604(13) | 0.77797(10) | 0.65025(4) | 0.01015(12)     |
| C10 | 0.45499(13) | 0.63617(10) | 0.64077(3) | 0.00868(11)     |
| O11 | 0.37449(11) | 0.51673(9)  | 0.54667(3) | 0.01140(10)     |
| C13 | 0.44911(14) | 0.29368(10) | 0.61896(4) | 0.01060(12)     |
| C14 | 0.26002(13) | 0.24373(11) | 0.58492(3) | 0.01069(11)     |
| C15 | 0.23747(13) | 0.38006(11) | 0.53839(4) | 0.01027(12)     |
| O15 | 0.11876(12) | 0.38043(10) | 0.49802(3) | 0.01471(12)     |
| C16 | 0.12685(17) | 0.10699(14) | 0.59132(4) | 0.01778(16)     |
| Cl1 | 0.01627(3)  | 0.74280(3)  | 0.75903(2) | 0.01565(5)      |

**Table S108.** Hydrogen coordinates and isotropic displacement parameters ( $\text{\AA}^2$ ) for *rac*-**10o**-Cry2.

|      | x      | y      | z      | $U_{\text{iso}}$ |
|------|--------|--------|--------|------------------|
| H21  | 0.9335 | 0.7029 | 0.5530 | 0.021(3)         |
| H22  | 0.6951 | 0.7494 | 0.5390 | 0.021(3)         |
| H31  | 0.8219 | 0.4511 | 0.6096 | 0.017(3)         |
| H32  | 0.7523 | 0.4296 | 0.5440 | 0.017(3)         |
| H5   | 0.1729 | 0.5372 | 0.6673 | 0.017(2)         |
| H7   | 0.3576 | 0.9820 | 0.7566 | 0.017(2)         |
| H8   | 0.6582 | 0.9989 | 0.7005 | 0.017(2)         |
| H131 | 0.5646 | 0.2082 | 0.6114 | 0.022(3)         |
| H132 | 0.4183 | 0.2935 | 0.6606 | 0.022(3)         |
| H161 | 0.0129 | 0.0943 | 0.5657 | 0.032(4)         |
| H162 | 0.1457 | 0.0222 | 0.6215 | 0.032(4)         |

**Table SI09.** Anisotropic displacement parameters ( $\text{\AA}^2$ ) for *rac-10o-Cry2*. The anisotropic displacement factor exponent takes the form:  $-2\pi^2[h^2 a^{*2}U_{11} + \dots + 2 h k a^* b^* U_{12}]$ .

|     | U <sub>11</sub> | U <sub>22</sub> | U <sub>33</sub> | U <sub>23</sub> | U <sub>13</sub> | U <sub>12</sub> |
|-----|-----------------|-----------------|-----------------|-----------------|-----------------|-----------------|
| O1  | 0.0135(3)       | 0.0145(2)       | 0.0160(3)       | -0.0027(2)      | 0.0038(2)       | -0.0063(2)      |
| C2  | 0.0160(4)       | 0.0155(3)       | 0.0139(3)       | -0.0009(3)      | 0.0045(3)       | -0.0047(3)      |
| C3  | 0.0118(3)       | 0.0127(3)       | 0.0159(4)       | -0.0019(3)      | 0.0029(3)       | -0.0012(3)      |
| C4  | 0.0106(3)       | 0.0086(2)       | 0.0082(3)       | 0.0001(2)       | -0.0006(2)      | -0.0012(2)      |
| C5  | 0.0106(3)       | 0.0086(2)       | 0.0108(3)       | -0.0002(2)      | 0.0003(2)       | -0.0007(2)      |
| C6  | 0.0115(3)       | 0.0099(2)       | 0.0106(3)       | 0.0002(2)       | 0.0006(2)       | 0.0013(2)       |
| C7  | 0.0148(3)       | 0.0102(3)       | 0.0115(3)       | -0.0021(2)      | -0.0019(2)      | 0.0013(2)       |
| C8  | 0.0134(3)       | 0.0095(3)       | 0.0135(3)       | -0.0018(2)      | -0.0022(3)      | -0.0019(2)      |
| C9  | 0.0109(3)       | 0.0089(3)       | 0.0107(3)       | 0.0001(2)       | -0.0004(2)      | -0.0022(2)      |
| C10 | 0.0100(3)       | 0.0077(2)       | 0.0084(3)       | 0.0001(2)       | -0.0005(2)      | -0.0011(2)      |
| O11 | 0.0153(3)       | 0.0102(2)       | 0.0088(2)       | 0.00088(18)     | -0.0026(2)      | -0.0028(2)      |
| C13 | 0.0134(3)       | 0.0080(2)       | 0.0104(3)       | 0.0005(2)       | -0.0011(2)      | -0.0010(2)      |
| C14 | 0.0122(3)       | 0.0096(2)       | 0.0102(3)       | -0.0002(2)      | 0.0003(2)       | -0.0021(3)      |
| C15 | 0.0113(3)       | 0.0106(3)       | 0.0089(3)       | -0.0013(2)      | 0.0004(2)       | -0.0010(2)      |
| O15 | 0.0148(3)       | 0.0177(3)       | 0.0116(3)       | -0.0008(2)      | -0.0038(2)      | -0.0012(2)      |
| C16 | 0.0191(4)       | 0.0164(3)       | 0.0179(4)       | 0.0028(3)       | -0.0022(3)      | -0.0082(3)      |
| Cl1 | 0.01536(9)      | 0.01426(8)      | 0.01733(9)      | -0.00054(6)     | 0.00593(7)      | 0.00252(7)      |

CCDC 1944606 contains the supplementary crystallographic data for this structure. This data can be obtained free of charge via <http://www.ccdc.cam.ac.uk/conts/retrieving.html> (or from the CCDC, 12 Union Road, Cambridge CB2 1EZ, UK; Fax: +44 1223 336033; E-mail: [deposit@ccdc.cam.ac.uk](mailto:deposit@ccdc.cam.ac.uk)).



**Table S110.** Full list of bond lengths [Å] and angles [°] for *rac*-**10o**-Cry2.

|            |            |                 |             |
|------------|------------|-----------------|-------------|
| O1-C9      | 1.3589(11) | C5-C10-C4       | 120.90(7)   |
| O1-C2      | 1.4405(12) | C15-O11-C4      | 112.03(6)   |
| C2-C3      | 1.5126(13) | C14-C13-C4      | 104.27(7)   |
| C2-H21     | 0.99       | C14-C13-H131    | 110.9       |
| C2-H22     | 0.99       | C4-C13-H131     | 110.9       |
| C3-C4      | 1.5210(12) | C14-C13-H132    | 110.9       |
| C3-H31     | 0.99       | C4-C13-H132     | 110.9       |
| C3-H32     | 0.99       | H131-C13-H132   | 108.9       |
| C4-O11     | 1.4769(10) | C16-C14-C15     | 122.12(8)   |
| C4-C10     | 1.5187(11) | C16-C14-C13     | 130.45(8)   |
| C4-C13     | 1.5505(11) | C15-C14-C13     | 107.43(7)   |
| C5-C6      | 1.3852(11) | O15-C15-O11     | 121.29(8)   |
| C5-C10     | 1.4049(12) | O15-C15-C14     | 129.05(8)   |
| C5-H5      | 0.95       | O11-C15-C14     | 109.66(7)   |
| C6-C7      | 1.3985(12) | C14-C16-H161    | 120.0       |
| C6-Cl1     | 1.7417(8)  | C14-C16-H162    | 120.0       |
| C7-C8      | 1.3835(13) | H161-C16-H162   | 120.0       |
| C7-H7      | 0.95       |                 |             |
| C8-C9      | 1.4025(12) |                 |             |
| C8-H8      | 0.95       | C9-O1-C2-C3     | -48.84(11)  |
| C9-C10     | 1.4018(11) | O1-C2-C3-C4     | 63.90(10)   |
| O11-C15    | 1.3525(10) | C2-C3-C4-O11    | 74.10(9)    |
| C13-C14    | 1.4979(12) | C2-C3-C4-C10    | -42.89(10)  |
| C13-H131   | 0.99       | C2-C3-C4-C13    | -170.95(7)  |
| C13-H132   | 0.99       | C10-C5-C6-C7    | -0.15(12)   |
| C14-C16    | 1.3313(12) | C10-C5-C6-Cl1   | -177.07(6)  |
| C14-C15    | 1.4866(12) | C5-C6-C7-C8     | 1.42(13)    |
| C15-O15    | 1.2119(11) | Cl1-C6-C7-C8    | 178.36(7)   |
| C16-H161   | 0.95       | C6-C7-C8-C9     | -0.46(13)   |
| C16-H162   | 0.95       | C2-O1-C9-C10    | 15.46(12)   |
|            |            | C2-O1-C9-C8     | -166.38(8)  |
| C9-O1-C2   | 114.94(7)  | C7-C8-C9-O1     | 180.00(8)   |
| O1-C2-C3   | 110.06(8)  | C7-C8-C9-C10    | -1.76(13)   |
| O1-C2-H21  | 109.6      | O1-C9-C10-C5    | -178.94(8)  |
| C3-C2-H21  | 109.6      | C8-C9-C10-C5    | 2.99(12)    |
| O1-C2-H22  | 109.6      | O1-C9-C10-C4    | 4.47(12)    |
| C3-C2-H22  | 109.6      | C8-C9-C10-C4    | -173.61(8)  |
| H21-C2-H22 | 108.2      | C6-C5-C10-C9    | -2.04(12)   |
| C2-C3-C4   | 110.78(7)  | C6-C5-C10-C4    | 174.54(7)   |
| C2-C3-H31  | 109.5      | O11-C4-C10-C9   | -106.23(8)  |
| C4-C3-H31  | 109.5      | C3-C4-C10-C9    | 10.51(10)   |
| C2-C3-H32  | 109.5      | C13-C4-C10-C9   | 137.37(8)   |
| C4-C3-H32  | 109.5      | O11-C4-C10-C5   | 77.26(9)    |
| H31-C3-H32 | 108.1      | C3-C4-C10-C5    | -166.00(7)  |
| O11-C4-C10 | 107.81(6)  | C13-C4-C10-C5   | -39.14(11)  |
| O11-C4-C3  | 107.42(6)  | C10-C4-O11-C15  | -115.60(7)  |
| C10-C4-C3  | 109.82(7)  | C3-C4-O11-C15   | 126.11(7)   |
| O11-C4-C13 | 105.11(6)  | C13-C4-O11-C15  | 6.61(9)     |
| C10-C4-C13 | 114.22(6)  | O11-C4-C13-C14  | -11.25(8)   |
| C3-C4-C13  | 112.06(7)  | C10-C4-C13-C14  | 106.71(8)   |
| C6-C5-C10  | 120.34(7)  | C3-C4-C13-C14   | -127.61(7)  |
| C6-C5-H5   | 119.8      | C4-C13-C14-C16  | -167.92(10) |
| C10-C5-H5  | 119.8      | C4-C13-C14-C15  | 12.02(9)    |
| C5-C6-C7   | 121.13(8)  | C4-O11-C15-O15  | -179.38(8)  |
| C5-C6-Cl1  | 119.79(6)  | C4-O11-C15-C14  | 1.04(9)     |
| C7-C6-Cl1  | 119.01(6)  | C16-C14-C15-O15 | -8.20(15)   |
| C8-C7-C6   | 118.88(8)  | C13-C14-C15-O15 | 171.85(9)   |
| C8-C7-H7   | 120.6      | C16-C14-C15-O11 | 171.35(9)   |
| C6-C7-H7   | 120.6      | C13-C14-C15-O11 | -8.60(9)    |
| C7-C8-C9   | 120.68(8)  |                 |             |
| C7-C8-H8   | 119.7      |                 |             |
| C9-C8-H8   | 119.7      |                 |             |
| O1-C9-C10  | 124.04(7)  |                 |             |
| O1-C9-C8   | 115.54(7)  |                 |             |
| C10-C9-C8  | 120.39(8)  |                 |             |
| C9-C10-C5  | 118.52(7)  |                 |             |
| C9-C10-C4  | 120.49(7)  |                 |             |

## (R)-10o

**Crystal Structure Determination of (R)-10o.** All the measurements were performed using monochromatized Mo  $K_{\alpha}$  radiation at 100K:  $C_{13}H_{11}ClO_3$ ,  $M_r$  250.67, orthorhombic, space group  $P 2_1 2_1 2_1$ ,  $a = 6.4226(3)\text{\AA}$ ,  $b = 7.3771(4)\text{\AA}$ ,  $c = 23.2909(11)\text{\AA}$ ,  $V = 1103.53(9)\text{\AA}^3$ ,  $Z = 4$ ,  $d_{\text{calc}} = 1.509\text{ g cm}^{-3}$ ,  $\mu = 0.338\text{ mm}^{-1}$ . A total of 23480 reflections were collected ( $\Theta_{\text{max}} = 39.9^\circ$ ), from which 6832 were unique ( $R_{\text{int}} = 0.0257$ ), with 6562 having  $I > 2\sigma(I)$ . The structure was solved by direct methods (SHELXS-97)<sup>7</sup> and refined by full-matrix least-squares techniques against  $F^2$  (SHELXL-2014/6)<sup>8</sup>. The non-hydrogen atoms were refined with anisotropic displacement parameters without any constraints. The absolute configuration was established by anomalous dispersion effects in the diffraction measurements on the crystal. The H atoms of the terminal  $CH_2$  group were refined with a common isotropic displacement parameter and idealized geometry with the hydrogen atoms in the plane through the atoms C13, C15, C16 and C–H distances of 0.95Å. The H atoms of the other  $CH_2$  groups were refined with common isotropic displacement parameters for the H atoms of the same group and idealized geometry with approximately tetrahedral angles and C–H distances of 0.99Å. The H atoms of the phenyl ring were put at the external bisectors of the C–C–C angles at C–H distances of 0.95Å and a common isotropic displacement parameter was refined for these H atoms. For 159 parameters final  $R$  indices of  $R_1 = 0.0267$  and  $wR^2 = 0.0732$  (GOF = 1.087) were obtained. The largest peak in a difference Fourier map was  $0.512\text{e}\text{\AA}^{-3}$ .

## Results and Discussion

**Crystal Structure.** The crystal structure analysis of (*R*)-**10o** confirmed the compound as (4*R*)-6-chloro-4'-methylene-2,3,3',4'-tetrahydro-5'*H*-spiro[chromene-4,2'-furan]-5'-one. All atoms lie on general positions (see Fig. S102). The determination of the absolute configuration from anomalous dispersion effects resulted in a Flack-parameter<sup>9</sup> of -0.02(4).

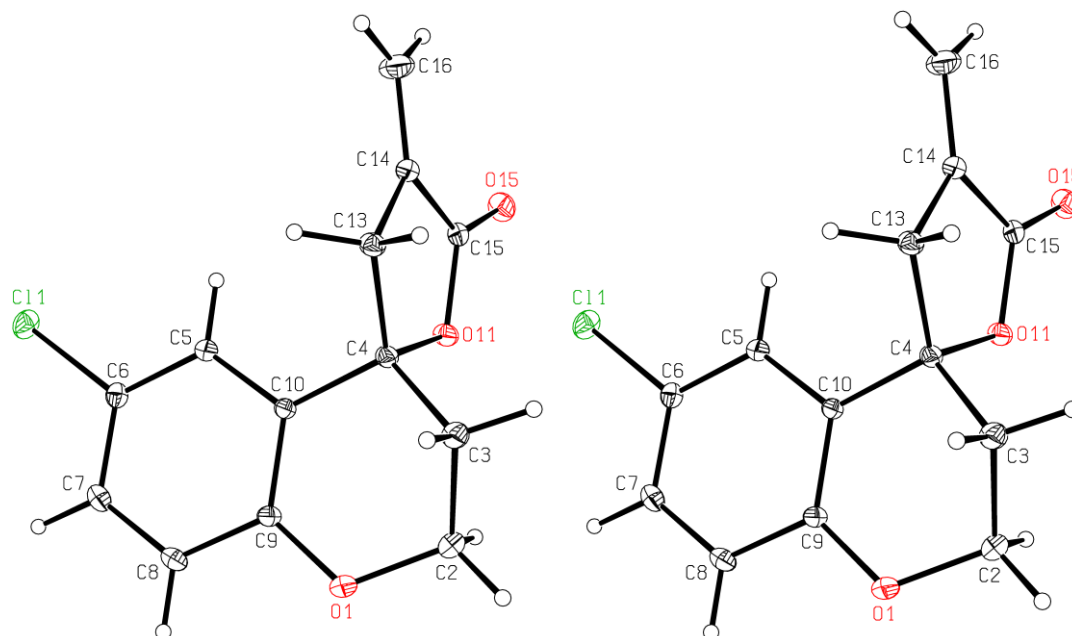

**Figure S102.** Stereoscopic ORTEP<sup>10</sup> plot of (*R*)-**10o** showing the atomic numbering scheme. The probability ellipsoids are drawn at the 50% probability level. The H atoms are drawn with arbitrary radii.

**Table S111.** Crystal data and structure refinement for (*R*)-10.

|                                        |                                                                                                                |
|----------------------------------------|----------------------------------------------------------------------------------------------------------------|
| Crystal data                           |                                                                                                                |
| CCDC number                            | 1944607                                                                                                        |
| Identification code                    | FE122                                                                                                          |
| Empirical formula                      | C <sub>13</sub> H <sub>11</sub> ClO <sub>3</sub>                                                               |
| Formula weight                         | 250.67                                                                                                         |
| Crystal description                    | needle, colourless                                                                                             |
| Crystal size                           | 0.45 x 0.38 x 0.30mm                                                                                           |
| Crystal system, space group            | orthorhombic, P 2 <sub>1</sub> 2 <sub>1</sub> 2 <sub>1</sub>                                                   |
| Unit cell dimensions:                  |                                                                                                                |
| a                                      | 6.4226(3)Å                                                                                                     |
| b                                      | 7.3771(4)Å                                                                                                     |
| c                                      | 23.2909(11)Å                                                                                                   |
| Volume                                 | 1103.53(9)Å <sup>3</sup>                                                                                       |
| Z                                      | 4                                                                                                              |
| Calculated density                     | 1.509Mg/m <sup>3</sup>                                                                                         |
| F(000)                                 | 520                                                                                                            |
| Linear absorption coefficient $\mu$    | 0.338mm <sup>-1</sup>                                                                                          |
| Absorption correction                  | semi-empirical from equivalents                                                                                |
| Max. and min. transmission             | 1.000 and 0.908                                                                                                |
| Unit cell determination                | 2.76° < $\Theta$ < 40.69°<br>9930 reflections used at 100K                                                     |
| Data collection                        |                                                                                                                |
| Temperature                            | 100K                                                                                                           |
| Diffractometer                         | Bruker APEX-II CCD                                                                                             |
| Radiation source                       | Incoatec microfocus sealed tube                                                                                |
| Radiation and wavelength               | MoK $\alpha$ , 0.71073Å                                                                                        |
| Monochromator                          | multilayer monochromator                                                                                       |
| Scan type                              | $\phi$ and $\omega$ scans                                                                                      |
| $\Theta$ range for data collection     | 2.90 to 40.00°                                                                                                 |
| Reflections collected / unique         | 23480 / 6832                                                                                                   |
| Significant unique reflections         | 6562 with $I > 2\sigma(I)$                                                                                     |
| R(int), R(sigma)                       | 0.0257, 0.0240                                                                                                 |
| Completeness to $\Theta = 39.99^\circ$ | 99.9%                                                                                                          |
| Refinement                             |                                                                                                                |
| Refinement method                      | Full-matrix least-squares on F <sup>2</sup>                                                                    |
| Data / parameters / restraints         | 6832 / 159 / 0                                                                                                 |
| Goodness-of-fit on F <sup>2</sup>      | 1.087                                                                                                          |
| Final R indices [ $I > 2\sigma(I)$ ]   | R1 = 0.0267, wR2 = 0.0722                                                                                      |
| R indices (all data)                   | R1 = 0.0284, wR2 = 0.0732                                                                                      |
| Absolute structure parameter           | -0.016(35)                                                                                                     |
| Extinction expression                  | none                                                                                                           |
| Weighting scheme                       | w = 1/[ $\sigma^2(F_o^2)+(aP)^2+bP$ ] where P = (F <sub>o</sub> <sup>2</sup> +2F <sub>c</sub> <sup>2</sup> )/3 |
| Weighting scheme parameters a, b       | 0.0432, 0.0676                                                                                                 |
| Largest $\Delta/\sigma$ in last cycle  | 0.001                                                                                                          |
| Largest difference peak and hole       | 0.512 and -0.250e/Å <sup>3</sup>                                                                               |
| Structure Solution Program             | SHELXS-97 (Sheldrick, 2008)                                                                                    |
| Structure Refinement Program           | SHELXL-2014/6 (Sheldrick, 2015)                                                                                |

**Table S112.** Atomic coordinates and equivalent isotropic displacement parameters ( $\text{\AA}^2$ ) for (*R*)-**10**.  $U_{\text{eq}}$  is defined as one third of the trace of the orthogonalized  $U_{ij}$  tensor.

|     | x           | y           | z          | $U_{\text{eq}}$ |
|-----|-------------|-------------|------------|-----------------|
| O1  | 0.22403(11) | 0.19968(10) | 0.37960(3) | 0.01445(12)     |
| C2  | 0.21011(15) | 0.30322(13) | 0.43186(4) | 0.01494(14)     |
| C3  | 0.26895(14) | 0.49832(12) | 0.42071(4) | 0.01304(13)     |
| C4  | 0.49509(12) | 0.51281(10) | 0.40200(3) | 0.00888(11)     |
| C5  | 0.72720(13) | 0.37007(11) | 0.32608(3) | 0.00967(11)     |
| C6  | 0.76244(12) | 0.24180(11) | 0.28381(3) | 0.01024(11)     |
| C7  | 0.61847(14) | 0.10377(11) | 0.27306(4) | 0.01183(12)     |
| C8  | 0.44032(14) | 0.09464(11) | 0.30627(4) | 0.01180(13)     |
| C9  | 0.40396(12) | 0.22195(10) | 0.34975(3) | 0.00980(12)     |
| C10 | 0.54470(12) | 0.36401(10) | 0.35923(3) | 0.00842(11)     |
| O11 | 0.62529(10) | 0.48330(9)  | 0.45330(3) | 0.01104(10)     |
| C13 | 0.55066(13) | 0.70619(11) | 0.38100(4) | 0.01036(12)     |
| C14 | 0.73974(12) | 0.75633(12) | 0.41506(3) | 0.01031(11)     |
| C15 | 0.76236(12) | 0.61997(11) | 0.46158(3) | 0.00995(12)     |
| O15 | 0.88102(11) | 0.61967(10) | 0.50198(3) | 0.01440(12)     |
| C16 | 0.87276(16) | 0.89311(14) | 0.40864(4) | 0.01738(16)     |
| Cl1 | 0.98367(3)  | 0.25725(3)  | 0.24096(2) | 0.01528(5)      |

**Table S113.** Hydrogen coordinates and isotropic displacement parameters ( $\text{\AA}^2$ ) for (*R*)-**10**.

|      | x      | y      | z      | $U_{\text{iso}}$ |
|------|--------|--------|--------|------------------|
| H21  | 0.3047 | 0.2509 | 0.4611 | 0.020(3)         |
| H22  | 0.0662 | 0.2974 | 0.4470 | 0.020(3)         |
| H31  | 0.2476 | 0.5703 | 0.4561 | 0.016(3)         |
| H32  | 0.1779 | 0.5488 | 0.3904 | 0.016(3)         |
| H5   | 0.8270 | 0.4627 | 0.3327 | 0.019(2)         |
| H7   | 0.6426 | 0.0177 | 0.2434 | 0.019(2)         |
| H8   | 0.3416 | 0.0011 | 0.2995 | 0.019(2)         |
| H131 | 0.5815 | 0.7064 | 0.3394 | 0.025(3)         |
| H132 | 0.4350 | 0.7916 | 0.3886 | 0.025(3)         |
| H161 | 0.9868 | 0.9059 | 0.4343 | 0.031(3)         |
| H162 | 0.8537 | 0.9779 | 0.3784 | 0.031(3)         |

**Table SI14.** Anisotropic displacement parameters ( $\text{\AA}^2$ ) for (*R*)-**10**. The anisotropic displacement factor exponent takes the form:  $-2\pi^2[h^2 a^{*2}U_{11} + \dots + 2 h k a^* b^* U_{12}]$ .

|     | $U_{11}$   | $U_{22}$   | $U_{33}$   | $U_{23}$    | $U_{13}$     | $U_{12}$     |
|-----|------------|------------|------------|-------------|--------------|--------------|
| O1  | 0.0131(3)  | 0.0150(3)  | 0.0152(3)  | -0.0028(2)  | 0.0038(2)    | -0.0062(2)   |
| C2  | 0.0159(3)  | 0.0157(3)  | 0.0132(3)  | -0.0008(3)  | 0.0044(3)    | -0.0050(3)   |
| C3  | 0.0113(3)  | 0.0129(3)  | 0.0149(3)  | -0.0020(3)  | 0.0029(2)    | -0.0013(2)   |
| C4  | 0.0100(3)  | 0.0087(2)  | 0.0079(2)  | 0.0000(2)   | -0.0009(2)   | -0.0011(2)   |
| C5  | 0.0101(3)  | 0.0089(3)  | 0.0100(3)  | -0.0004(2)  | 0.0002(2)    | -0.0009(2)   |
| C6  | 0.0108(3)  | 0.0103(3)  | 0.0096(3)  | 0.0002(2)   | 0.0005(2)    | 0.0018(2)    |
| C7  | 0.0142(3)  | 0.0106(3)  | 0.0107(3)  | -0.0021(2)  | -0.0018(2)   | 0.0013(2)    |
| C8  | 0.0130(3)  | 0.0099(3)  | 0.0125(3)  | -0.0020(2)  | -0.0019(2)   | -0.0018(2)   |
| C9  | 0.0103(3)  | 0.0091(3)  | 0.0100(3)  | 0.0000(2)   | -0.0001(2)   | -0.0023(2)   |
| C10 | 0.0097(3)  | 0.0078(2)  | 0.0078(2)  | 0.0000(2)   | -0.0004(2)   | -0.0011(2)   |
| O11 | 0.0149(3)  | 0.0103(2)  | 0.0079(2)  | 0.00115(18) | -0.00256(19) | -0.00295(19) |
| C13 | 0.0128(3)  | 0.0083(3)  | 0.0100(3)  | 0.0005(2)   | -0.0013(2)   | -0.0007(2)   |
| C14 | 0.0118(3)  | 0.0097(3)  | 0.0094(3)  | -0.0006(2)  | 0.0005(2)    | -0.0020(2)   |
| C15 | 0.0109(3)  | 0.0106(3)  | 0.0083(3)  | -0.0013(2)  | 0.0004(2)    | -0.0008(2)   |
| O15 | 0.0142(3)  | 0.0181(3)  | 0.0108(2)  | -0.0011(2)  | -0.0040(2)   | -0.0011(2)   |
| C16 | 0.0188(4)  | 0.0162(4)  | 0.0171(4)  | 0.0031(3)   | -0.0023(3)   | -0.0080(3)   |
| Cl1 | 0.01476(8) | 0.01454(8) | 0.01653(9) | -0.00050(6) | 0.00601(6)   | 0.00252(7)   |

CCDC 1944607 contains the supplementary crystallographic data for this structure. This data can be obtained free of charge via <http://www.ccdc.cam.ac.uk/conts/retrieving.html> (or from the CCDC, 12 Union Road, Cambridge CB2 1EZ, UK; Fax: +44 1223 336033; E-mail: [deposit@ccdc.cam.ac.uk](mailto:deposit@ccdc.cam.ac.uk)).

**Table S115.** Full list of bond lengths [Å] and angles [°] for (R)-10.

|            |            |                 |            |
|------------|------------|-----------------|------------|
| O1-C9      | 1.3587(10) | C9-C10-C4       | 120.62(7)  |
| O1-C2      | 1.4397(11) | C5-C10-C4       | 120.90(6)  |
| C2-C3      | 1.5105(13) | C15-O11-C4      | 112.01(6)  |
| C2-H21     | 0.99       | C14-C13-C4      | 104.31(6)  |
| C2-H22     | 0.99       | C14-C13-H131    | 110.9      |
| C3-C4      | 1.5202(12) | C4-C13-H131     | 110.9      |
| C3-H31     | 0.99       | C14-C13-H132    | 110.9      |
| C3-H32     | 0.99       | C4-C13-H132     | 110.9      |
| C4-O11     | 1.4746(10) | H131-C13-H132   | 108.9      |
| C4-C10     | 1.5161(10) | C16-C14-C15     | 122.18(8)  |
| C4-C13     | 1.5497(11) | C16-C14-C13     | 130.45(8)  |
| C5-C6      | 1.3841(11) | C15-C14-C13     | 107.36(7)  |
| C5-C10     | 1.4042(11) | O15-C15-O11     | 121.28(8)  |
| C5-H5      | 0.95       | O15-C15-C14     | 129.02(8)  |
| C6-C7      | 1.3981(12) | O11-C15-C14     | 109.70(7)  |
| C6-Cl1     | 1.7401(8)  | C14-C16-H161    | 120.0      |
| C7-C8      | 1.3828(13) | C14-C16-H162    | 120.0      |
| C7-H7      | 0.95       | H161-C16-H162   | 120.0      |
| C8-C9      | 1.4007(12) |                 |            |
| C8-H8      | 0.95       |                 |            |
| C9-C10     | 1.4015(11) | C9-O1-C2-C3     | 48.76(11)  |
| O11-C15    | 1.3523(10) | O1-C2-C3-C4     | -63.83(10) |
| C13-C14    | 1.4969(11) | C2-C3-C4-O11    | -74.10(8)  |
| C13-H131   | 0.99       | C2-C3-C4-C10    | 42.88(9)   |
| C13-H132   | 0.99       | C2-C3-C4-C13    | 170.94(7)  |
| C14-C16    | 1.3305(12) | C10-C5-C6-C7    | -0.01(12)  |
| C14-C15    | 1.4856(12) | C10-C5-C6-Cl1   | 177.10(6)  |
| C15-O15    | 1.2109(10) | C5-C6-C7-C8     | -1.27(12)  |
| C16-H161   | 0.95       | Cl1-C6-C7-C8    | -178.41(7) |
| C16-H162   | 0.95       | C6-C7-C8-C9     | 0.34(13)   |
|            |            | C2-O1-C9-C8     | 166.47(8)  |
| C9-O1-C2   | 114.92(7)  | C2-O1-C9-C10    | -15.46(12) |
| O1-C2-C3   | 110.16(7)  | C7-C8-C9-O1     | -179.99(8) |
| O1-C2-H21  | 109.6      | C7-C8-C9-C10    | 1.87(12)   |
| C3-C2-H21  | 109.6      | O1-C9-C10-C5    | 178.92(8)  |
| O1-C2-H22  | 109.6      | C8-C9-C10-C5    | -3.10(11)  |
| C3-C2-H22  | 109.6      | O1-C9-C10-C4    | -4.32(12)  |
| H21-C2-H22 | 108.1      | C8-C9-C10-C4    | 173.65(7)  |
| C2-C3-C4   | 110.82(7)  | C6-C5-C10-C9    | 2.18(12)   |
| C2-C3-H31  | 109.5      | C6-C5-C10-C4    | -174.56(7) |
| C4-C3-H31  | 109.5      | O11-C4-C10-C9   | 106.09(8)  |
| C2-C3-H32  | 109.5      | C3-C4-C10-C9    | -10.62(10) |
| C4-C3-H32  | 109.5      | C13-C4-C10-C9   | -137.45(7) |
| H31-C3-H32 | 108.1      | O11-C4-C10-C5   | -77.24(9)  |
| O11-C4-C10 | 107.84(6)  | C3-C4-C10-C5    | 166.05(7)  |
| O11-C4-C3  | 107.40(6)  | C13-C4-C10-C5   | 39.23(10)  |
| C10-C4-C3  | 109.77(6)  | C10-C4-O11-C15  | 115.64(7)  |
| O11-C4-C13 | 105.13(6)  | C3-C4-O11-C15   | -126.11(7) |
| C10-C4-C13 | 114.26(6)  | C13-C4-O11-C15  | -6.64(8)   |
| C3-C4-C13  | 112.04(7)  | O11-C4-C13-C14  | 11.24(8)   |
| C6-C5-C10  | 120.38(7)  | C10-C4-C13-C14  | -106.78(7) |
| C6-C5-H5   | 119.8      | C3-C4-C13-C14   | 127.58(7)  |
| C10-C5-H5  | 119.8      | C4-C13-C14-C16  | 167.94(10) |
| C5-C6-C7   | 121.15(7)  | C4-C13-C14-C15  | -11.97(8)  |
| C5-C6-Cl1  | 119.78(6)  | C4-O11-C15-O15  | 179.35(8)  |
| C7-C6-Cl1  | 119.01(6)  | C4-O11-C15-C14  | -0.98(9)   |
| C8-C7-C6   | 118.85(8)  | C16-C14-C15-O15 | 8.25(15)   |
| C8-C7-H7   | 120.6      | C13-C14-C15-O15 | -171.83(9) |
| C6-C7-H7   | 120.6      | C16-C14-C15-O11 | -171.38(9) |
| C7-C8-C9   | 120.65(8)  | C13-C14-C15-O11 | 8.54(9)    |
| C7-C8-H8   | 119.7      |                 |            |
| C9-C8-H8   | 119.7      |                 |            |
| O1-C9-C8   | 115.51(7)  |                 |            |
| O1-C9-C10  | 123.94(7)  |                 |            |
| C8-C9-C10  | 120.52(7)  |                 |            |
| C9-C10-C5  | 118.39(7)  |                 |            |

NMR data



Benzyl acrylate (SI01) in CDCl<sub>3</sub> @ 300.13 MHz (<sup>1</sup>H) and 75.47 MHz (<sup>13</sup>C).

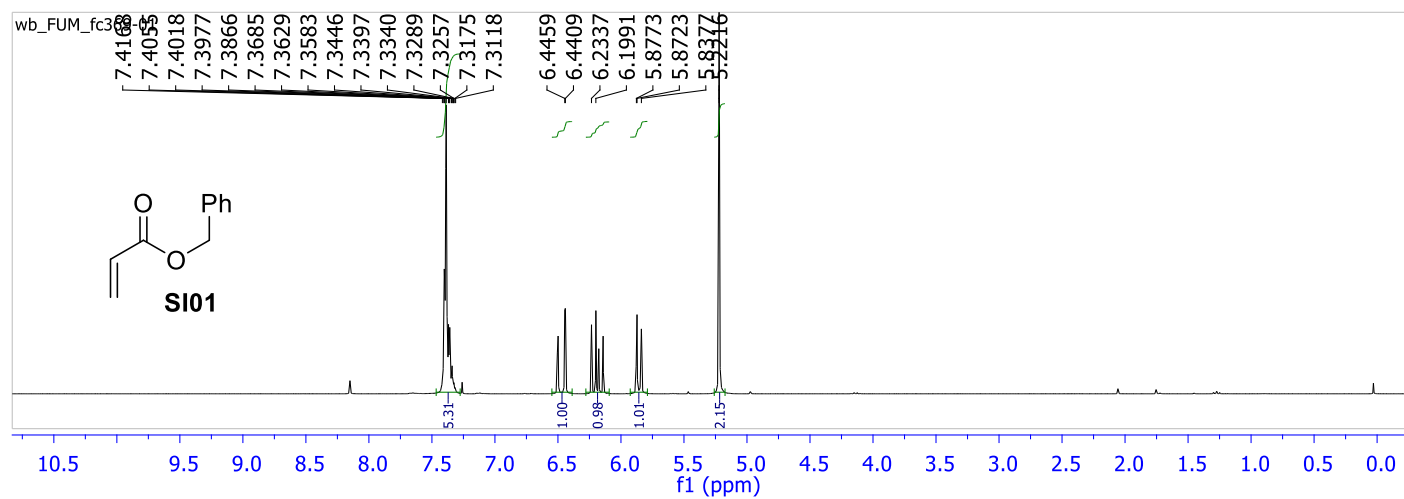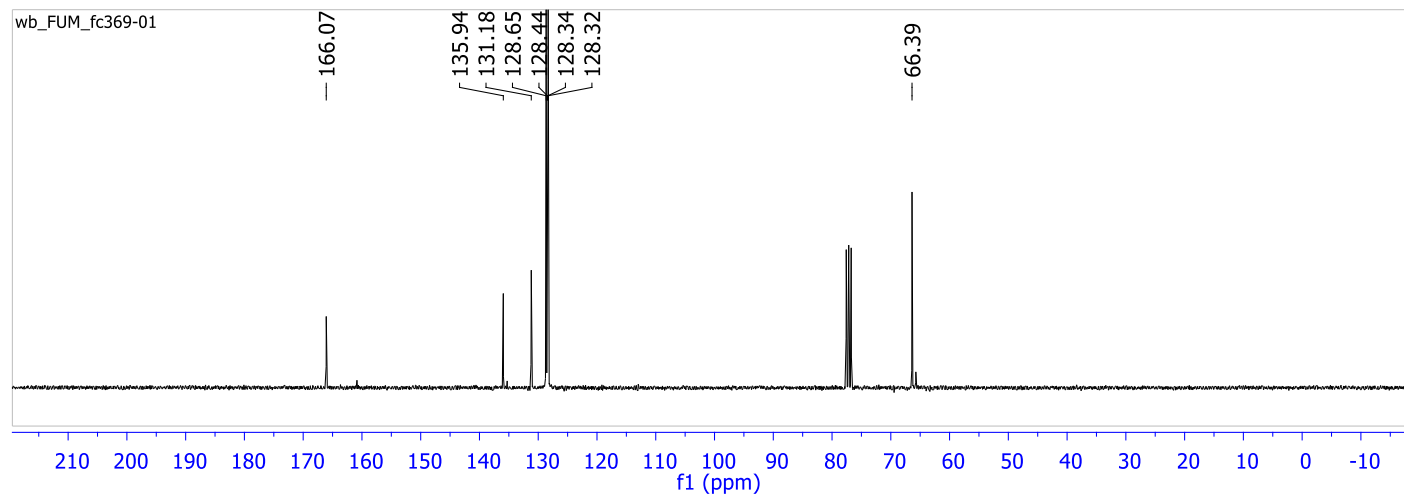

Benzhydryl 2-(hydroxymethyl)acrylate (**SI03**) in CDCl<sub>3</sub> @ 300.13 MHz (<sup>1</sup>H) and 75.47 MHz (<sup>13</sup>C).

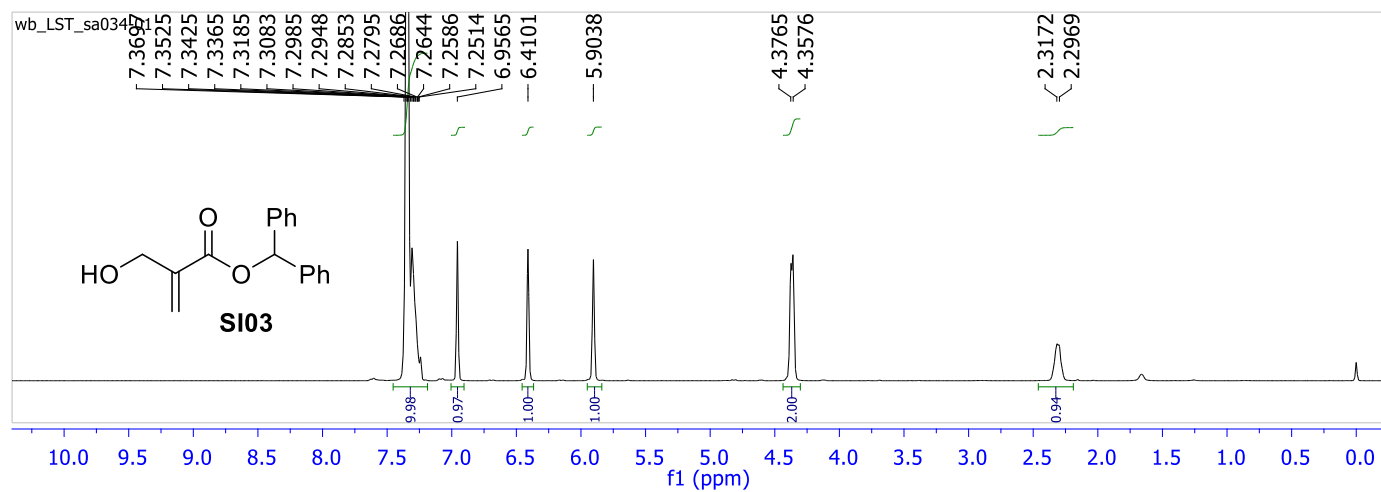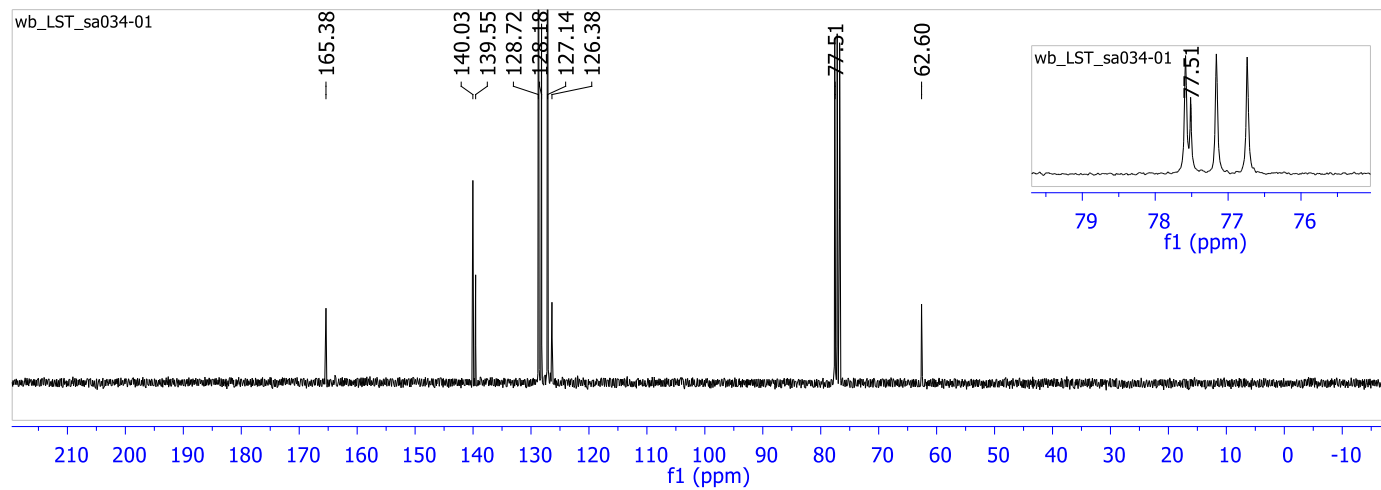

Benzhydryl 2-(bromomethyl)acrylate (**7d**) in CDCl<sub>3</sub> @ 300.13 MHz (<sup>1</sup>H) and 75.47 MHz (<sup>13</sup>C).

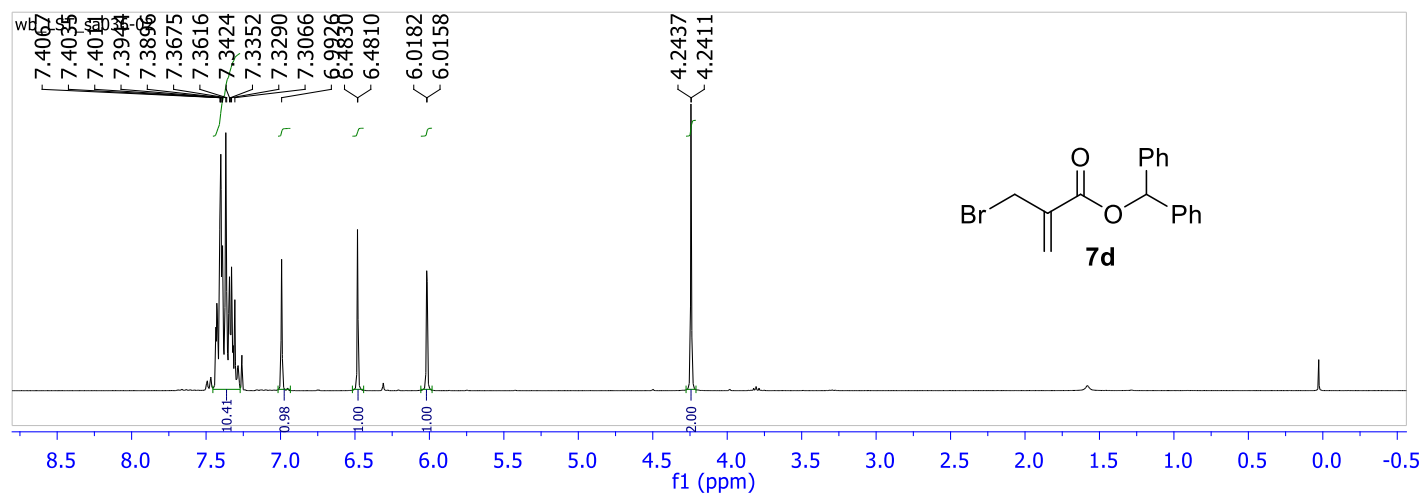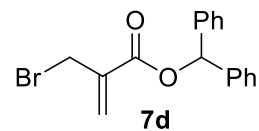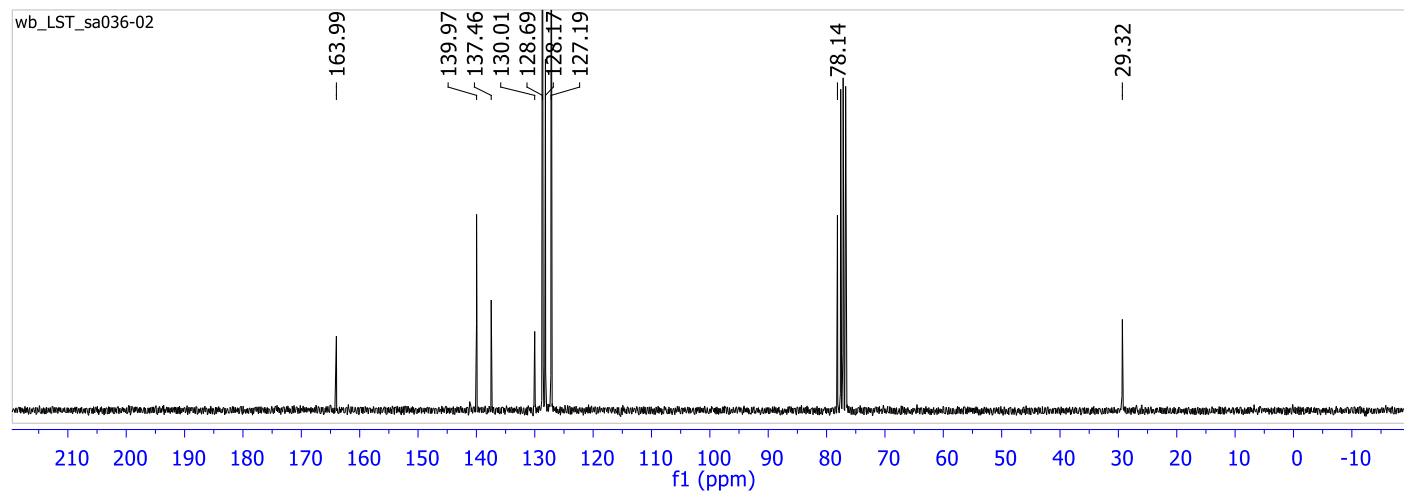

Benzhydryl 3-hydroxy-2-methylenebutanoate (**SI04**) in CDCl<sub>3</sub> @ 300.13 MHz (<sup>1</sup>H) and 75.47 MHz (<sup>13</sup>C).

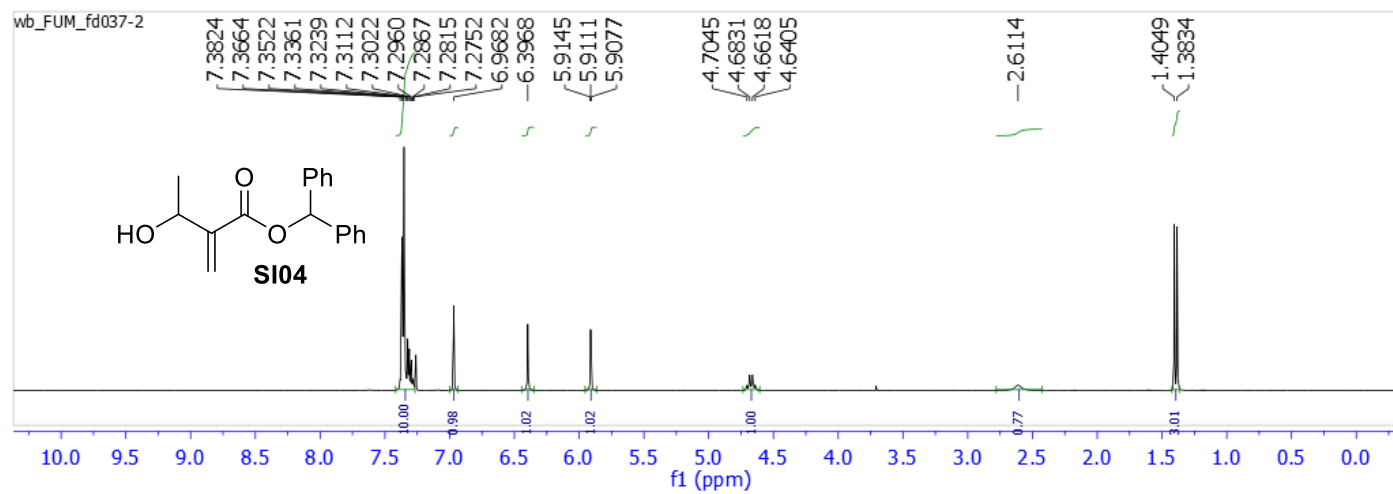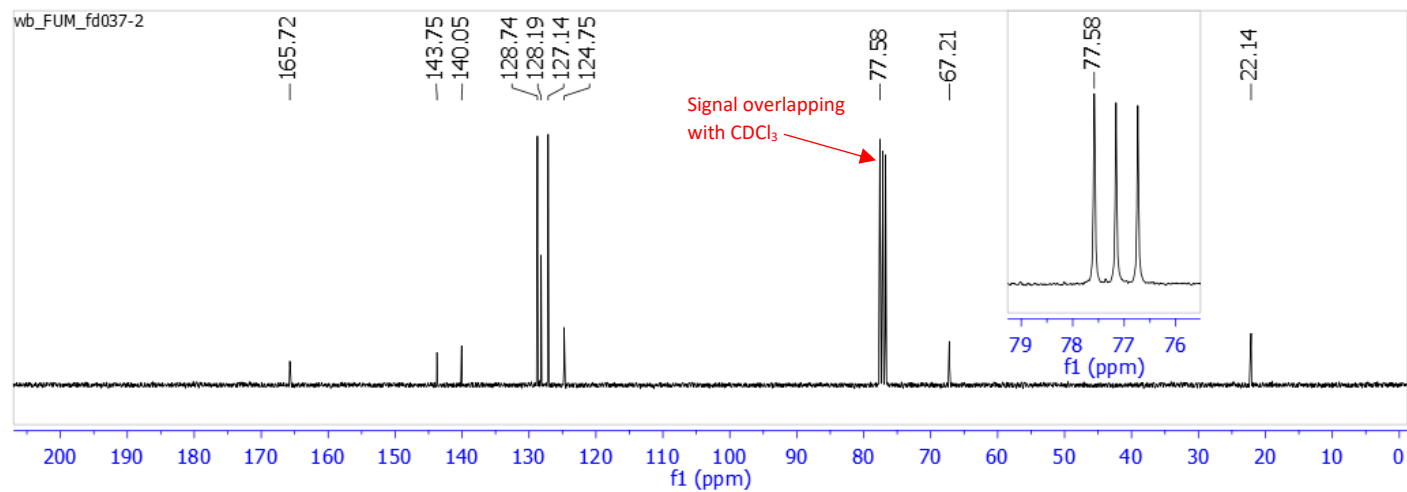

Benzhydryl (Z)-2-(bromomethyl)but-2-enoate (**7e**) in CDCl<sub>3</sub> @ 300.13 MHz (<sup>1</sup>H) and 75.47 MHz (<sup>13</sup>C).

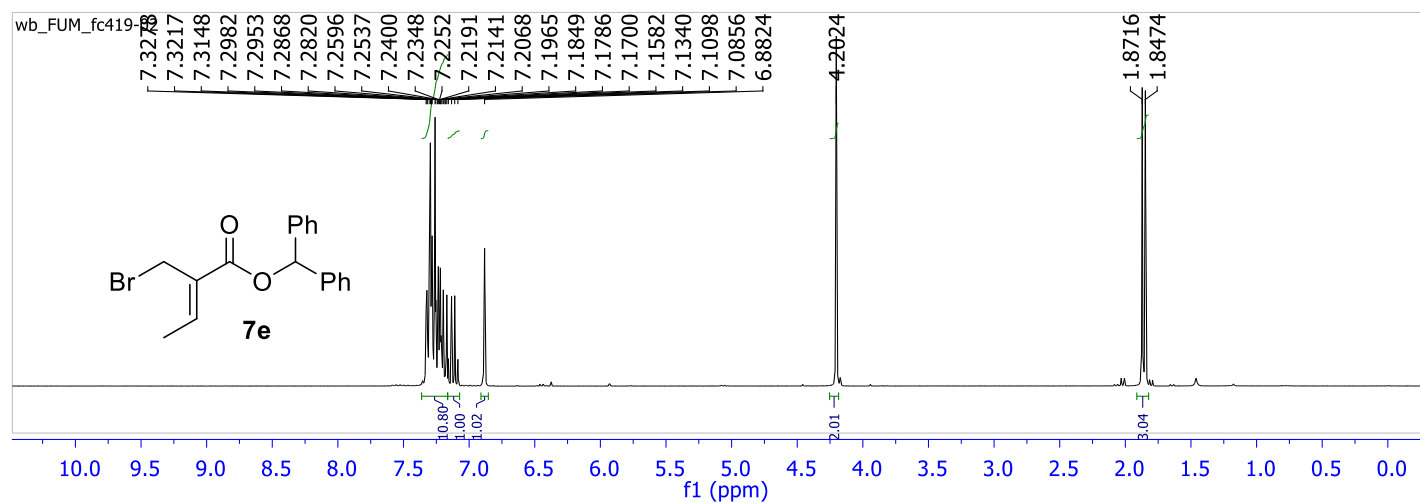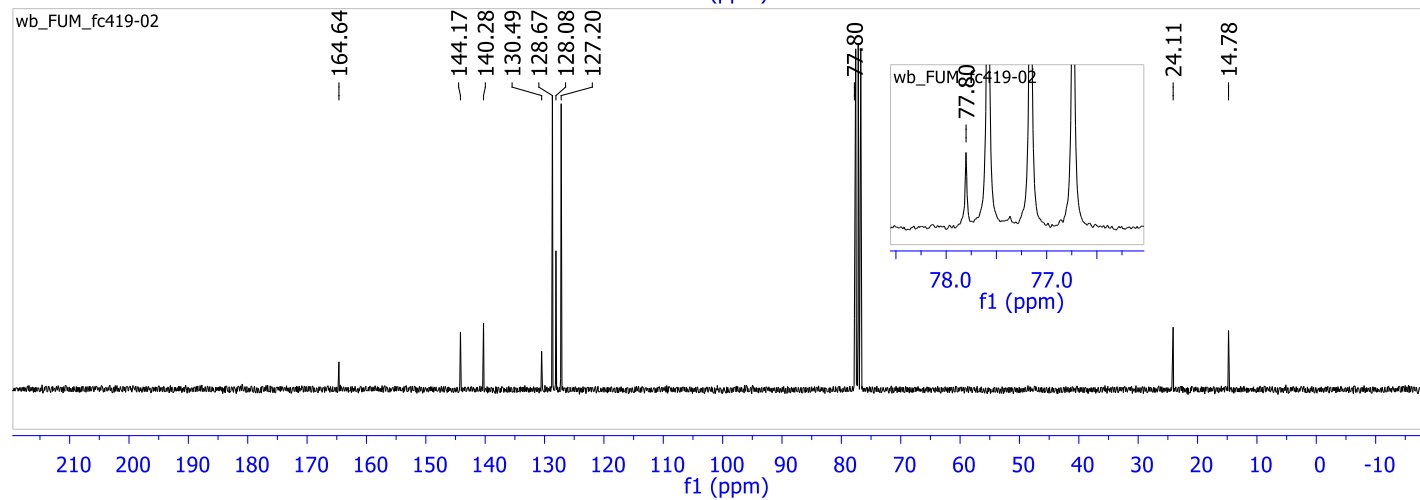

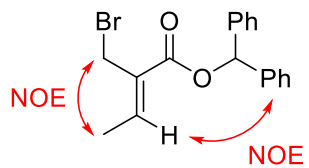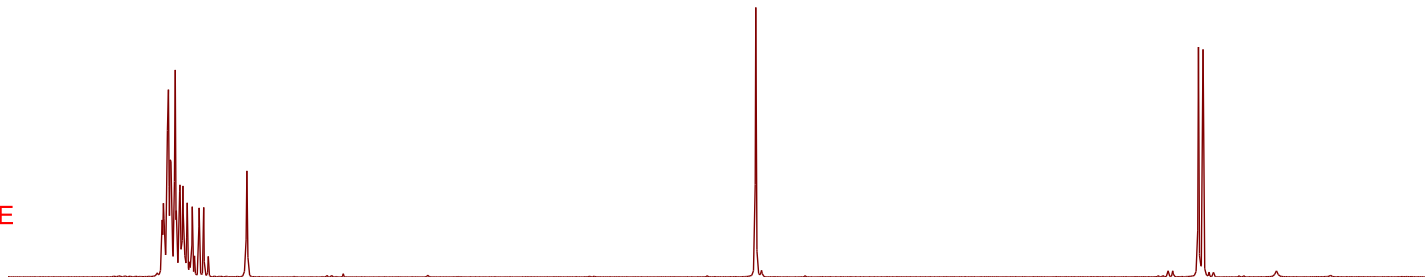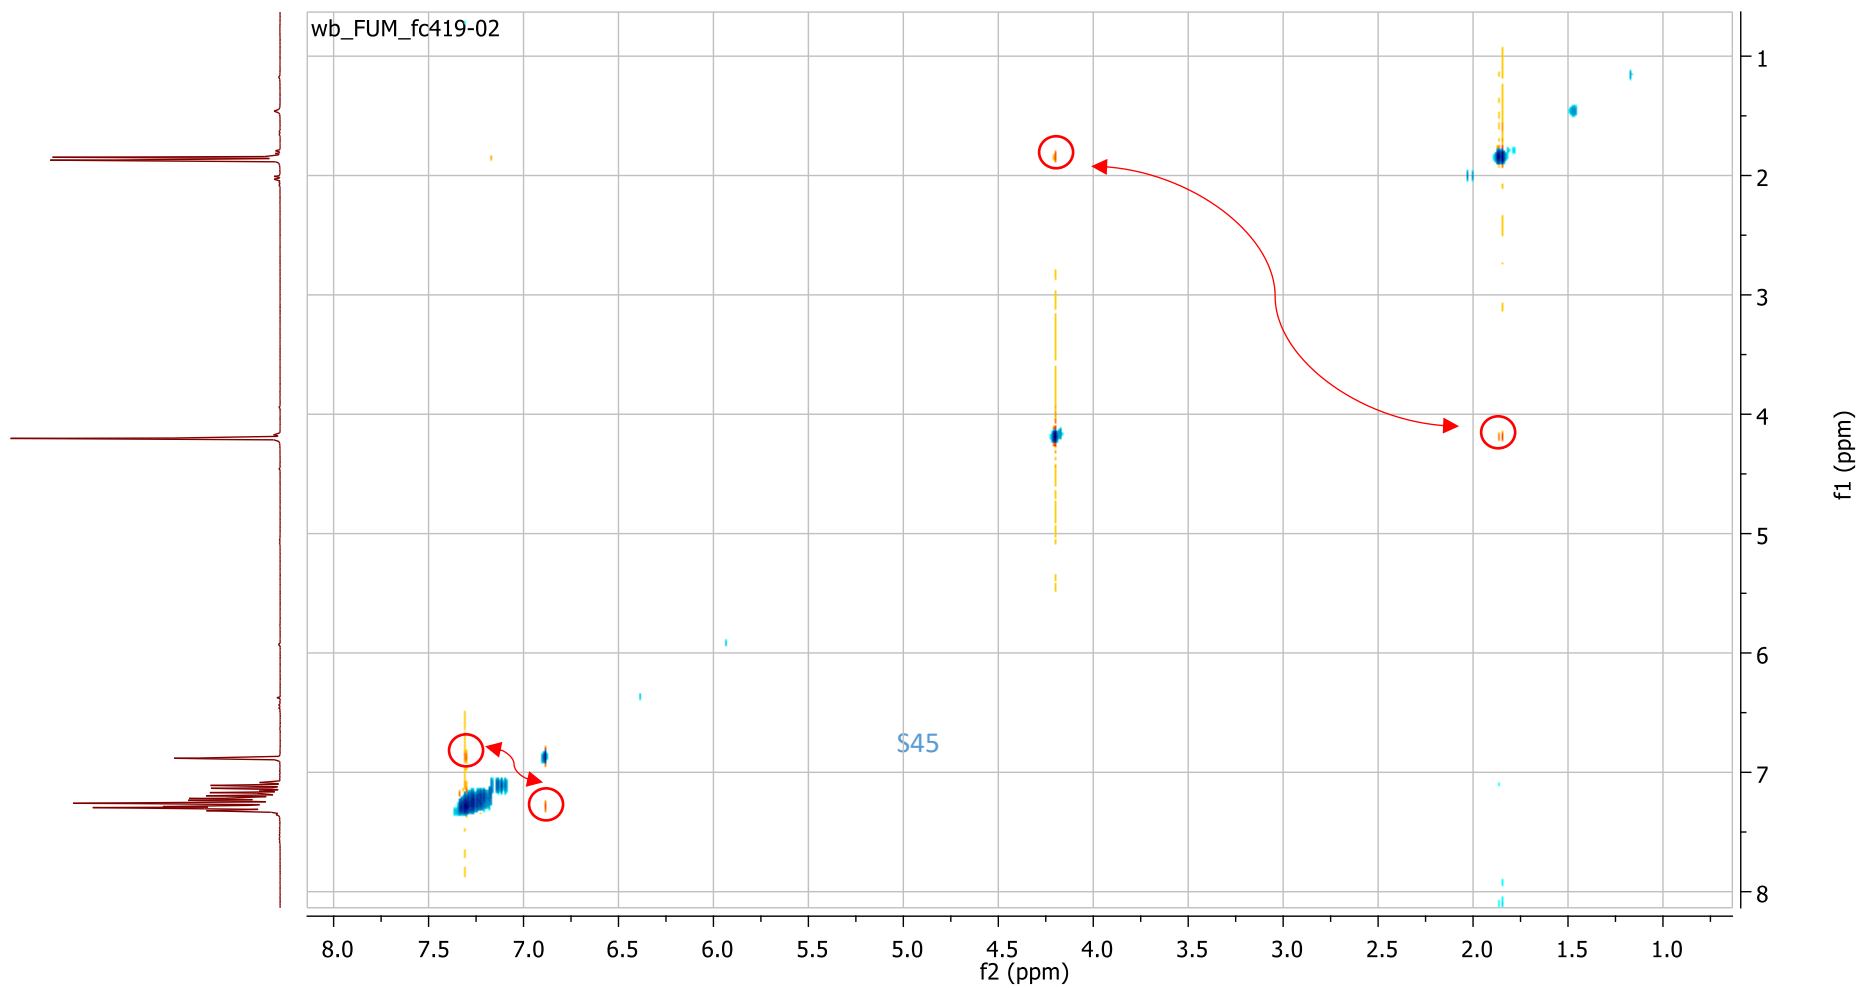

*N,N*-diethyl-2-(hydroxymethyl)acrylamide (SI7).

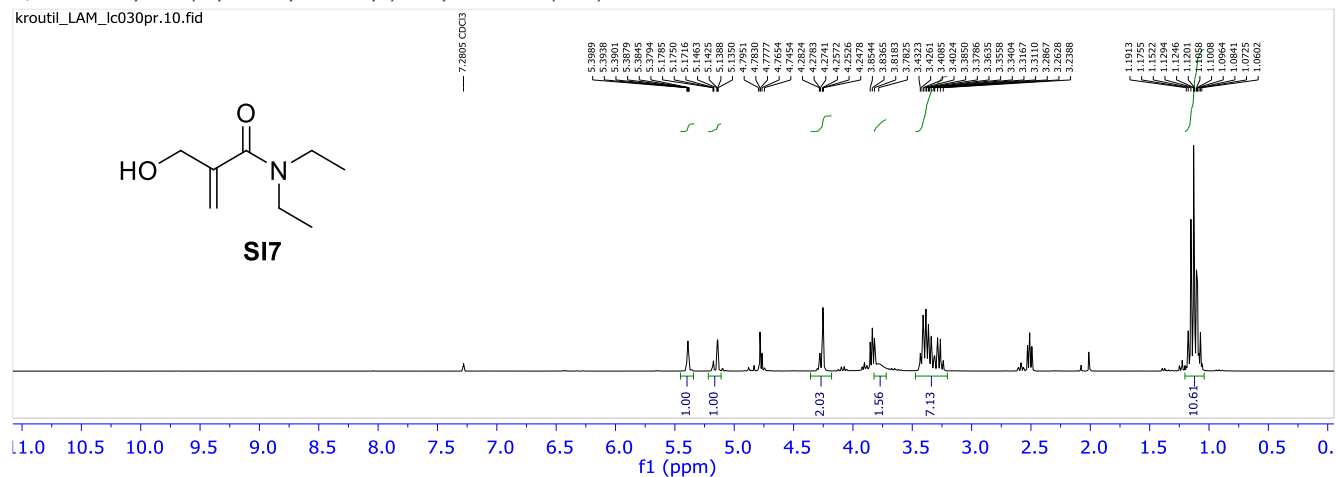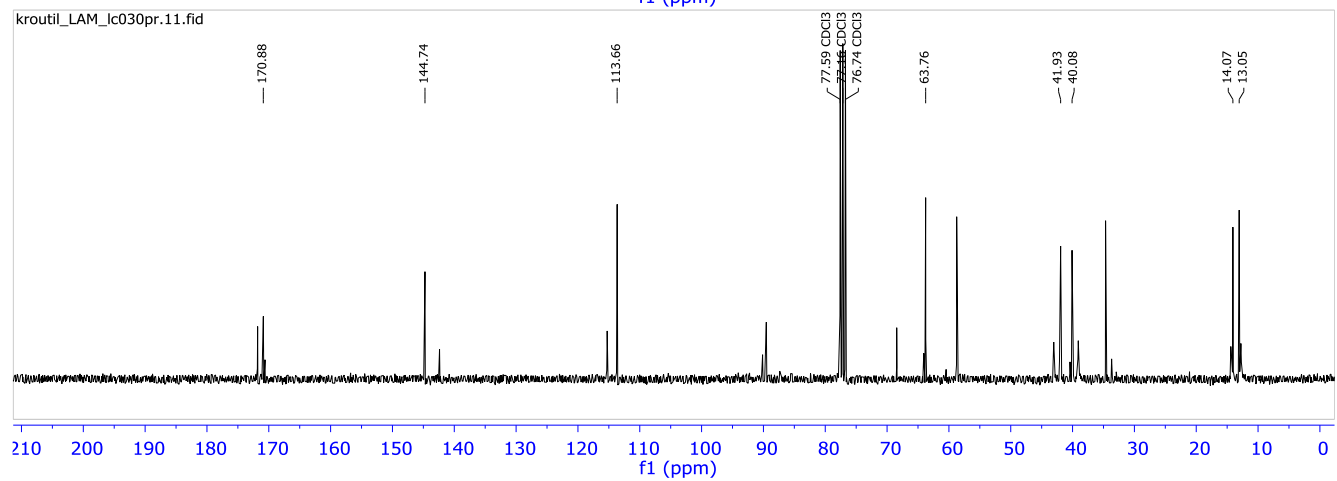

*N,N*-dibenzyl-2-(hydroxymethyl)acrylamide (**S18**).

kroutil\_LAM\_lc-028-pr.10.fid

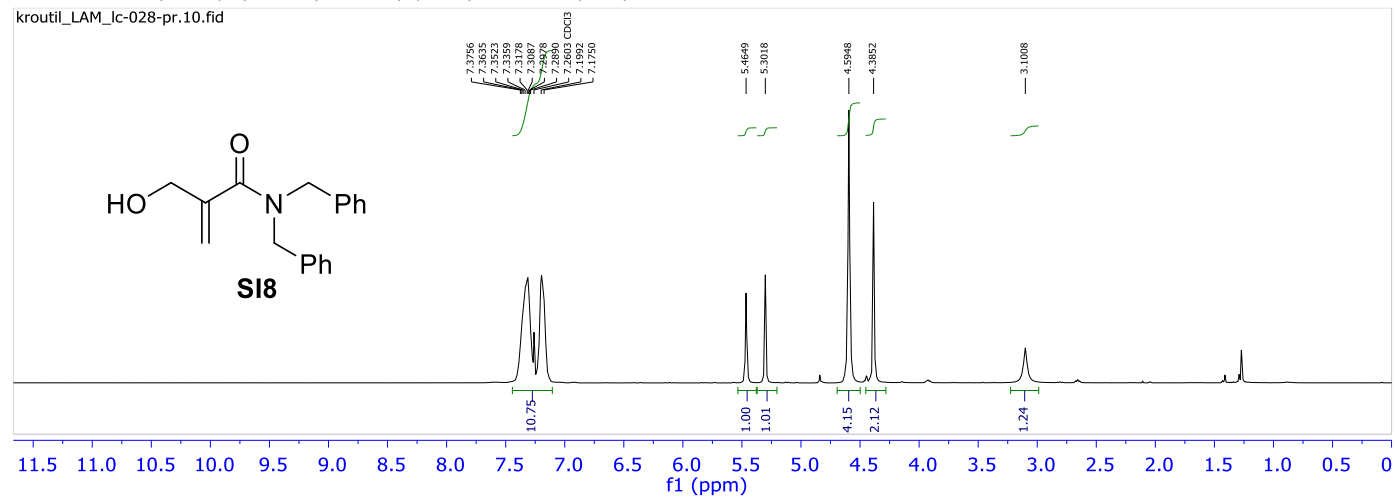

kroutil\_LAM\_lc-028-pr.11.fid

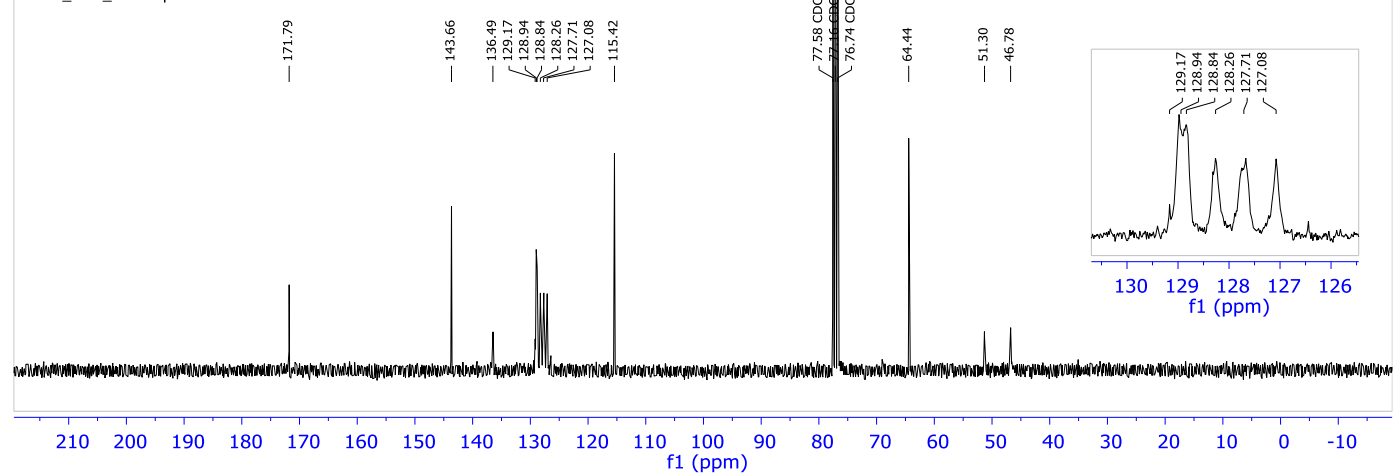



*N,N*-diethyl-2-(bromomethyl)acrylamide (S19).

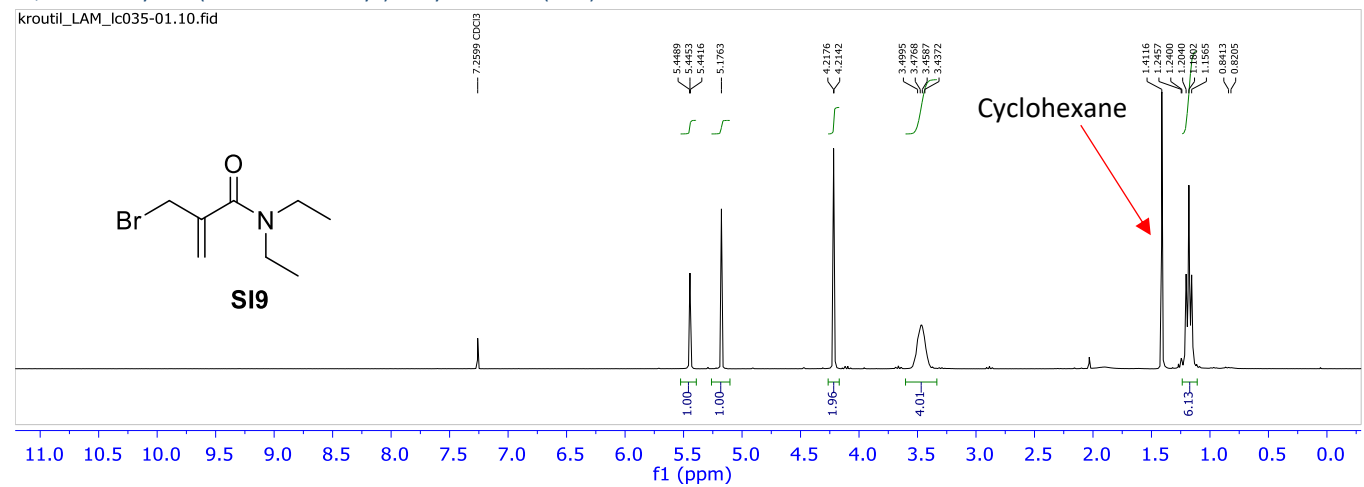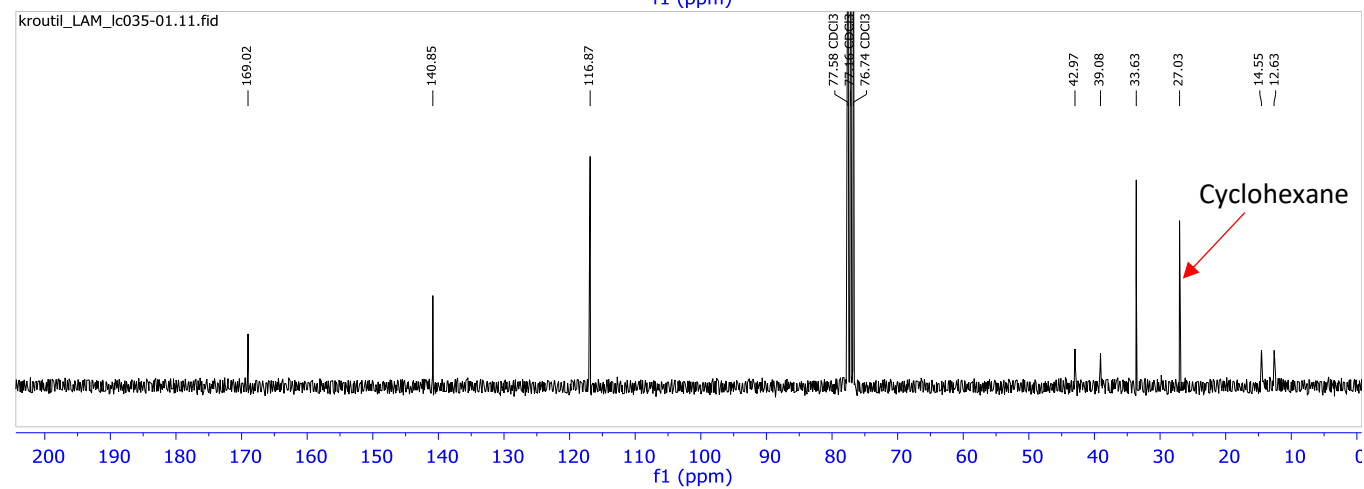

*N,N*-dibenzyl-2-(bromomethyl)acrylamide (**7f**).

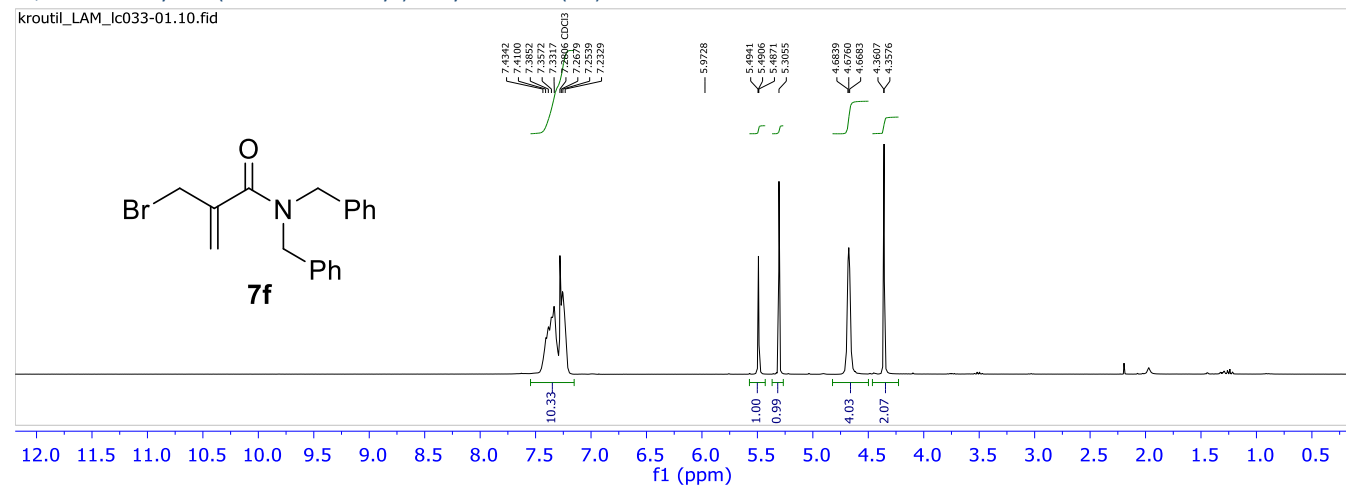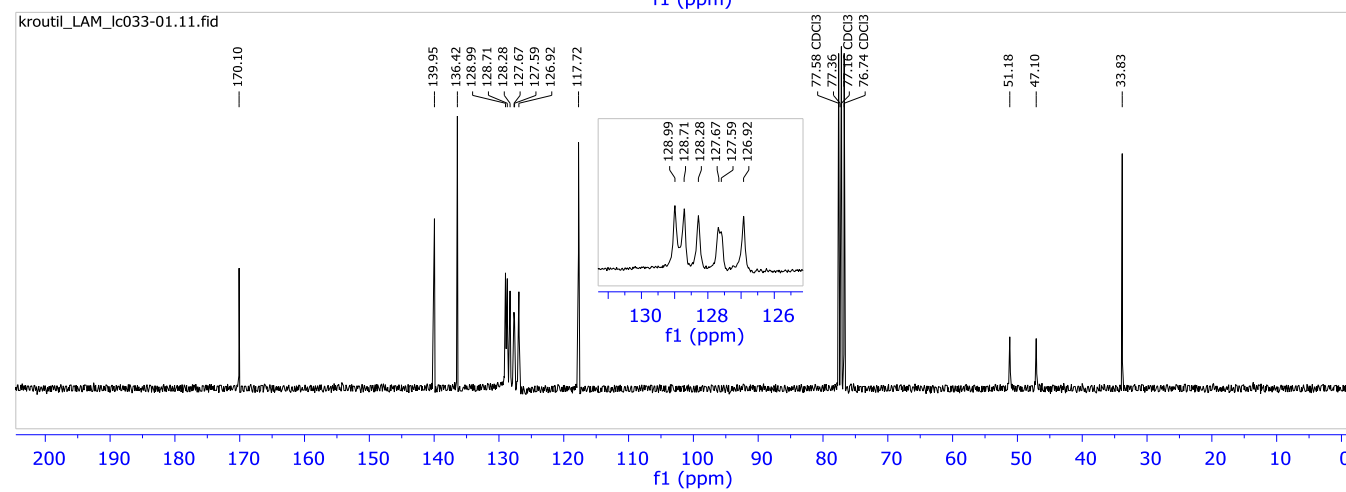

1-Phenylbut-3-en-1-ol (**8a**) in CDCl<sub>3</sub> @ 300.13 MHz (<sup>1</sup>H) and 75.47 MHz (<sup>13</sup>C).

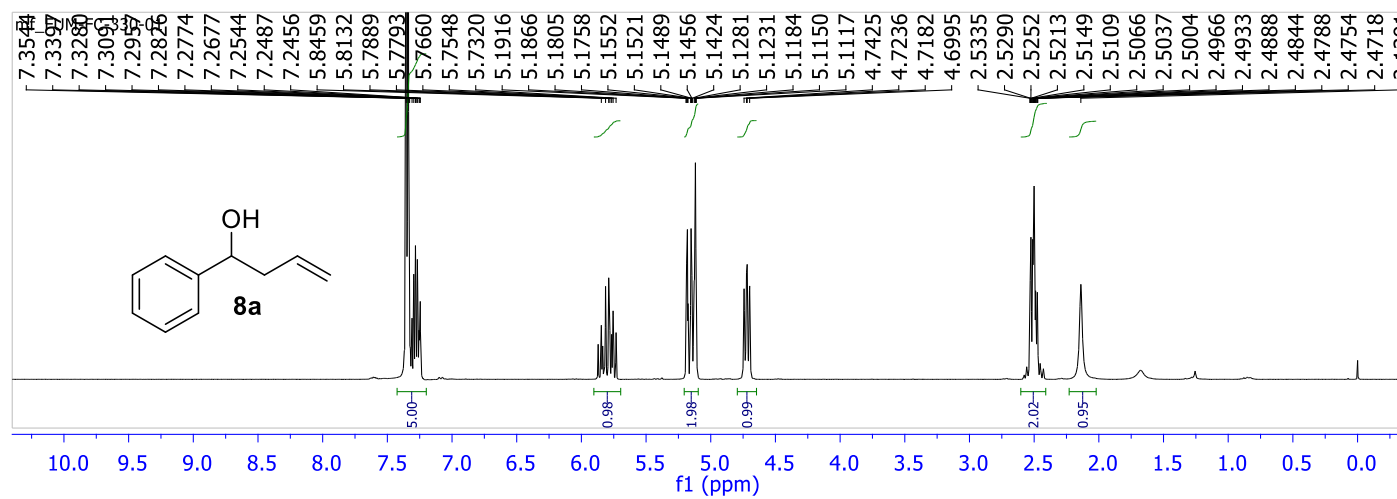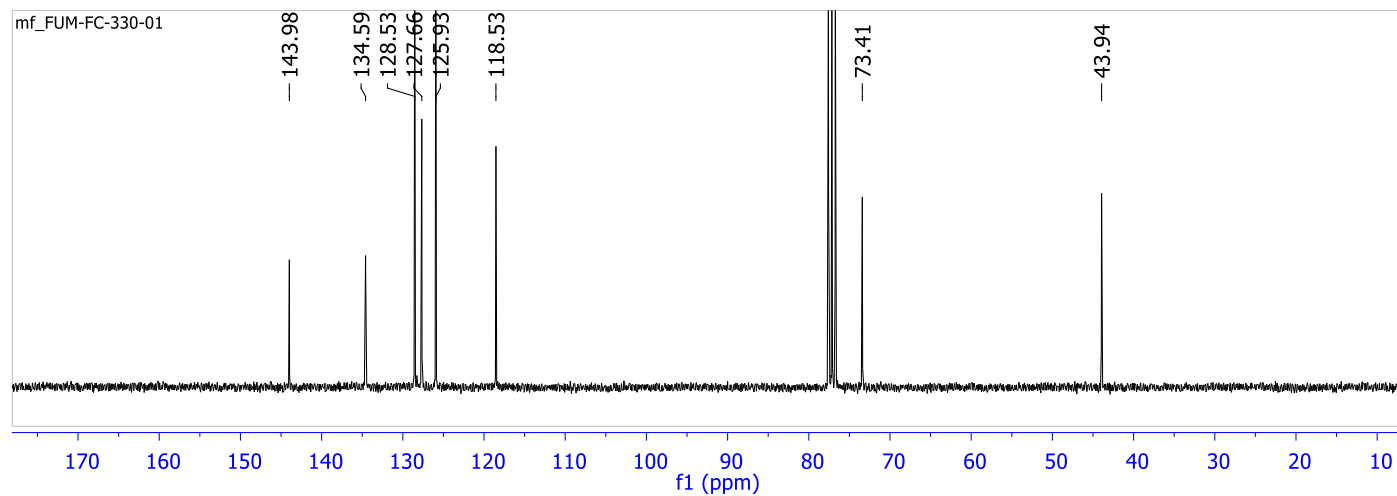

3-Methylene-5-phenyldihydrofuran-2(3H)-one (**10a**) in CDCl<sub>3</sub> @ 300.13 MHz (<sup>1</sup>H) and 75. 47 MHz (<sup>13</sup>C).

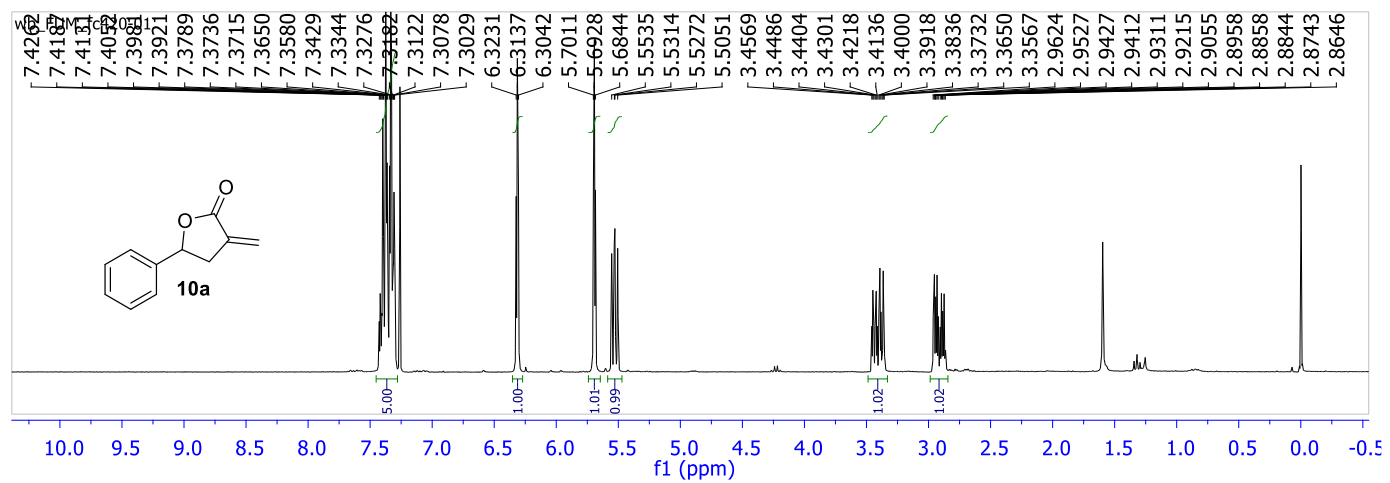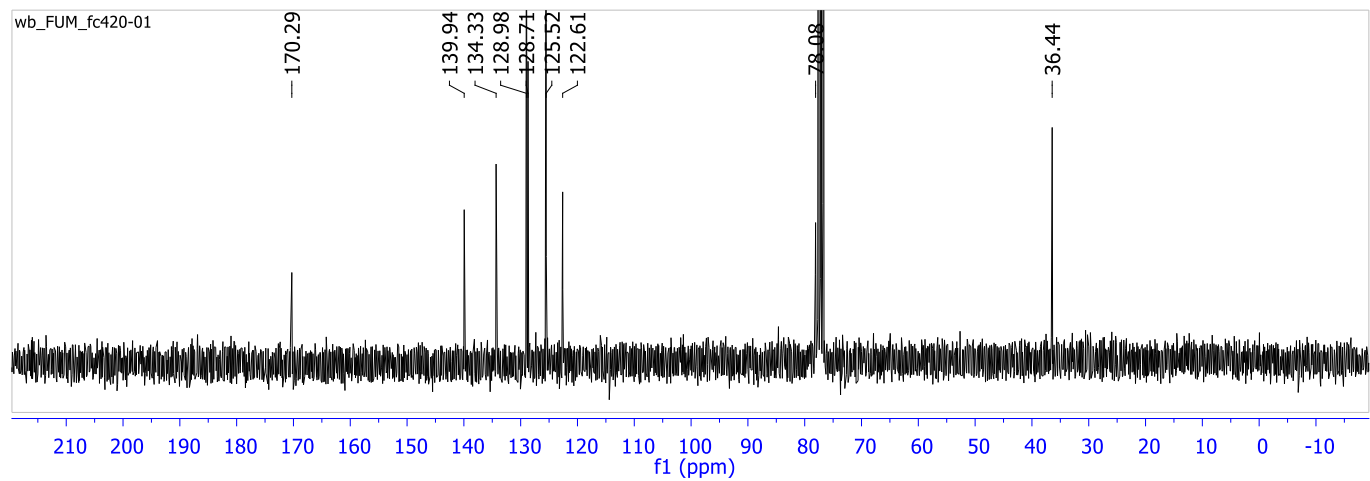

5-Methyl-3-methylene-5-phenyldihydrofuran-2(3H)-one (**10b**) in CDCl<sub>3</sub> @ 300.13 MHz (<sup>1</sup>H) and 75.47 MHz (<sup>13</sup>C).

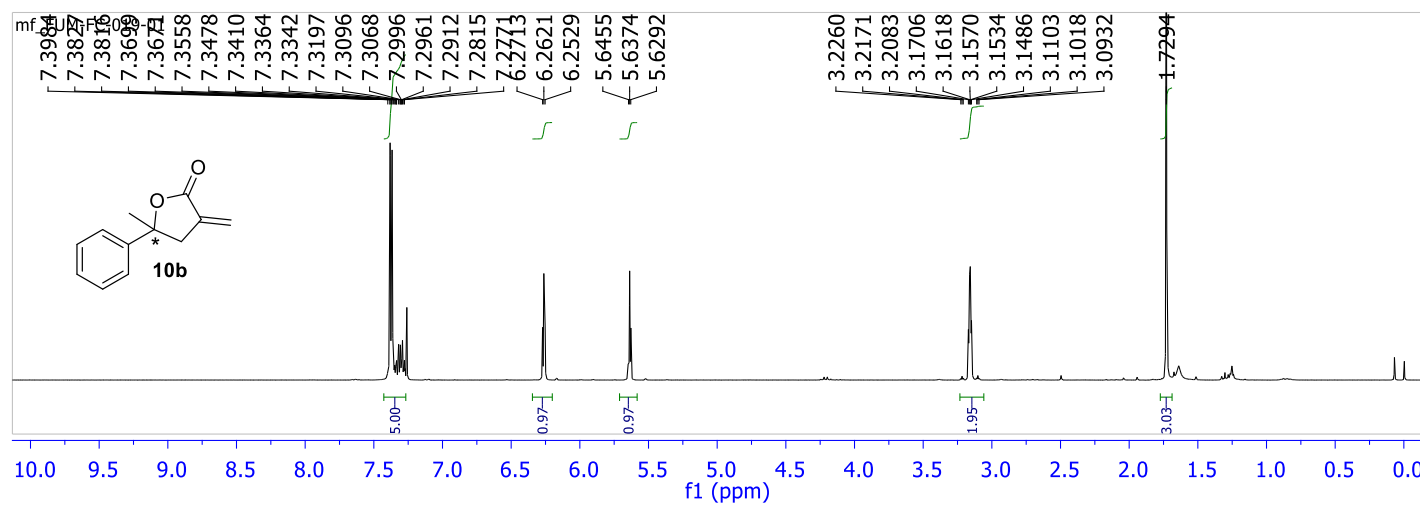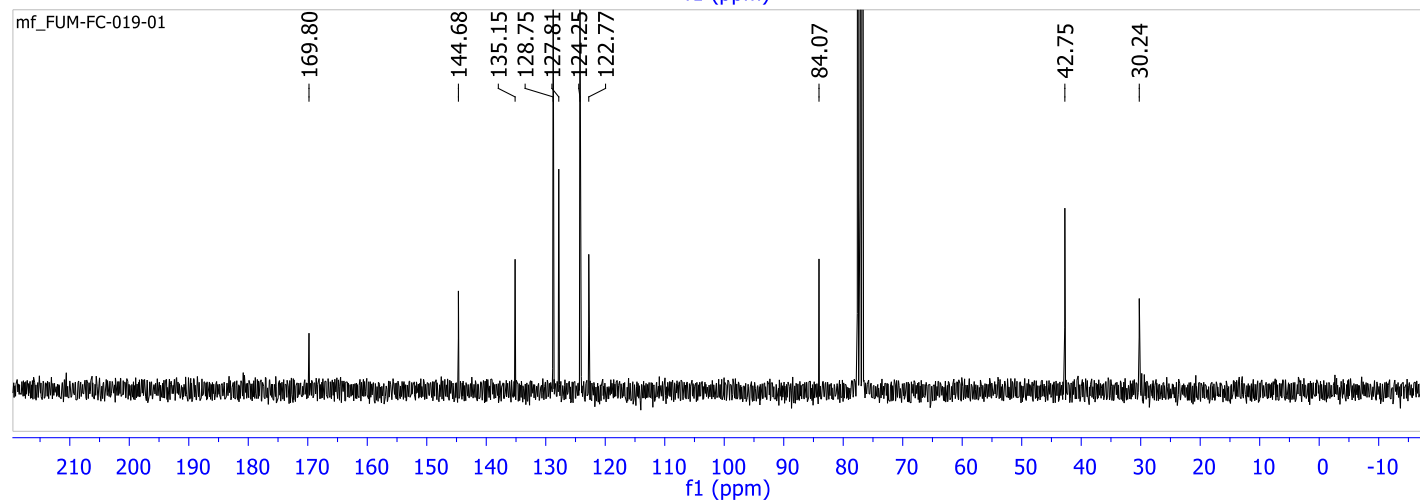

Benzhydryl 4-hydroxy-2-methylene-4-phenylpentanoate (**8e**) in CDCl<sub>3</sub> @ 300.13 MHz (<sup>1</sup>H) and 75.47 MHz (<sup>13</sup>C).

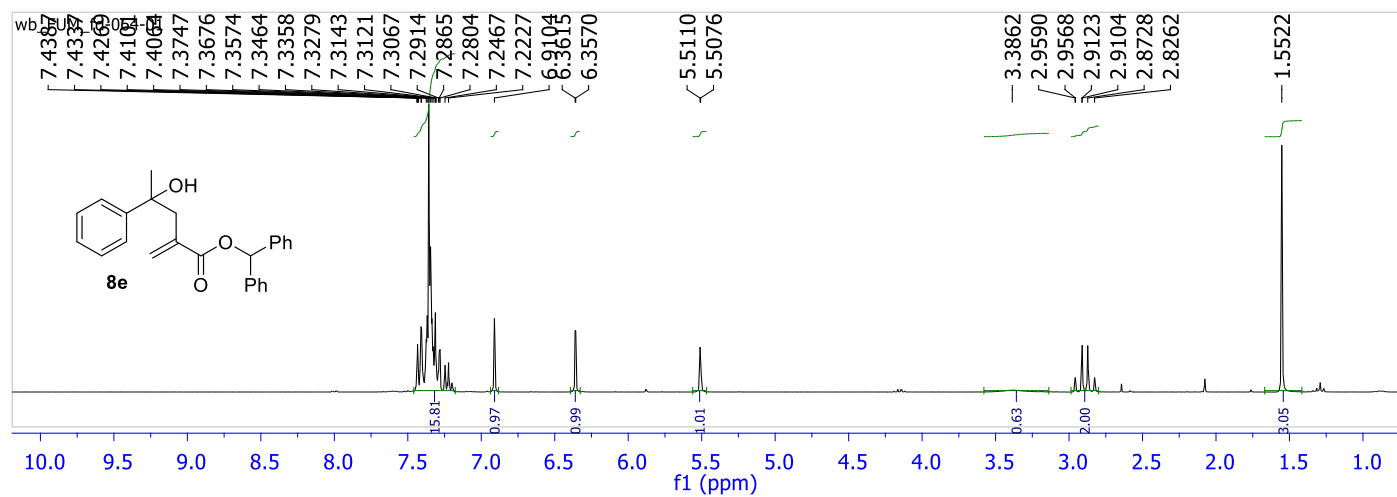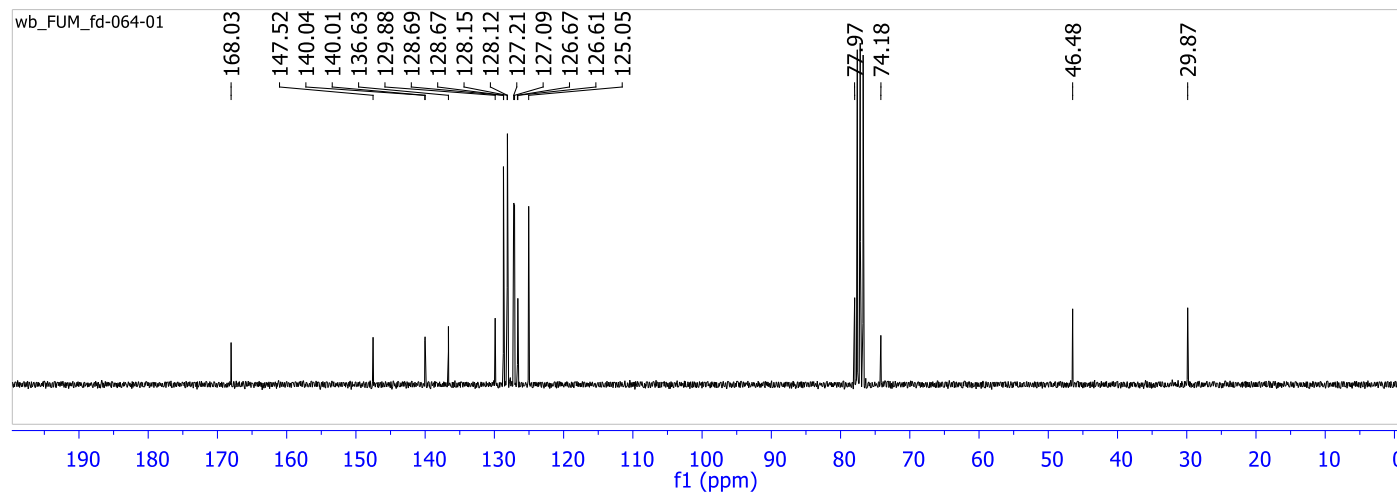

Benzhydryl 4-(4-bromophenyl)-4-hydroxy-2-methylenepentanoate (**8f**) in CDCl<sub>3</sub> @ 300.13 MHz (<sup>1</sup>H) and 75.47 MHz (<sup>13</sup>C).

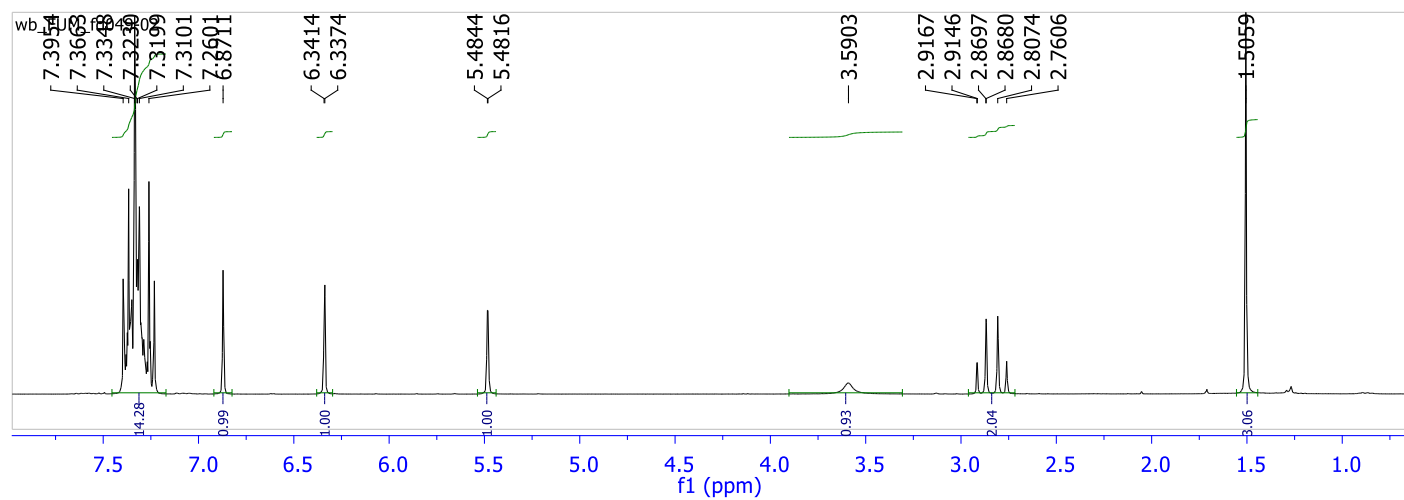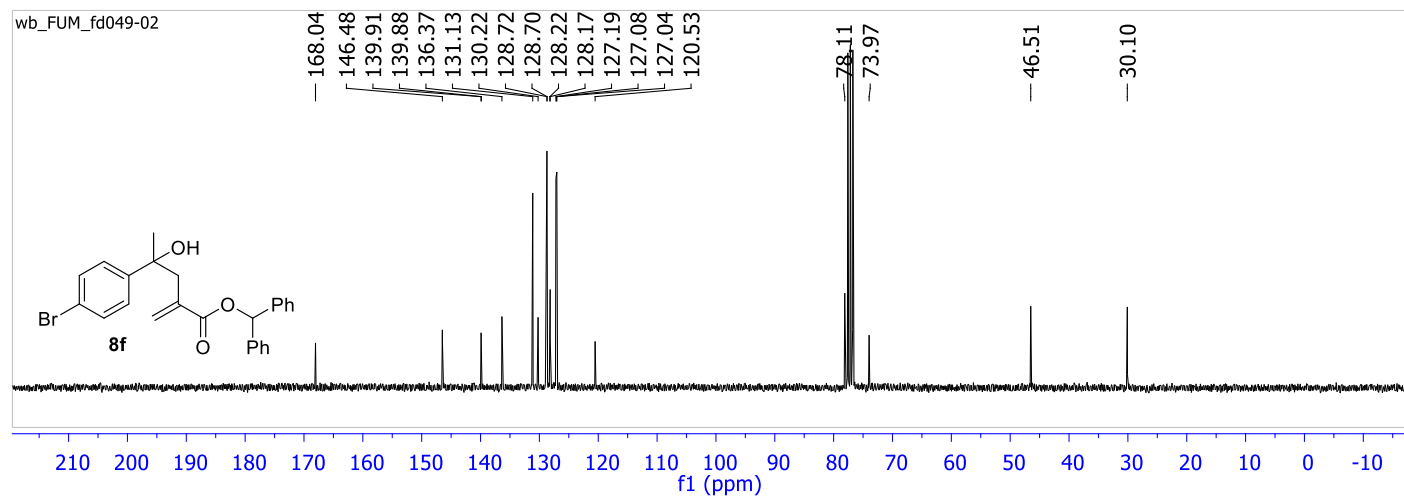

Benzhydryl 4-hydroxy-2-methylene-4-[4-(trifluoromethyl)phenyl]pentanoate (**8g**) in CDCl<sub>3</sub> @ 300.13 MHz (<sup>1</sup>H), 282.39 MHz (<sup>19</sup>F) and 75.47 MHz (<sup>13</sup>C; NMR spectra are shown in the same order with extensions of the <sup>13</sup>C-spectrum).

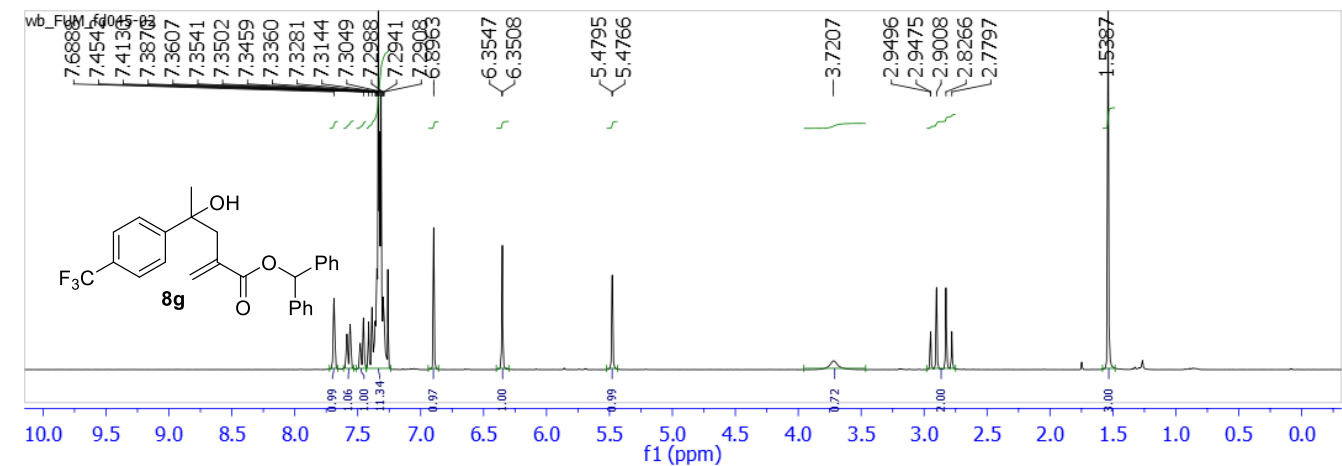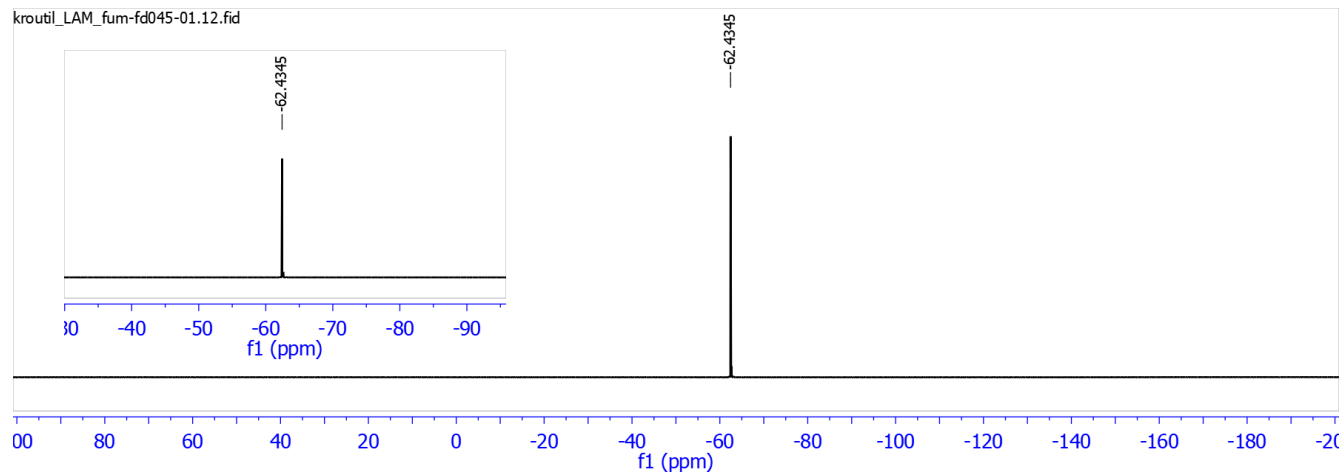



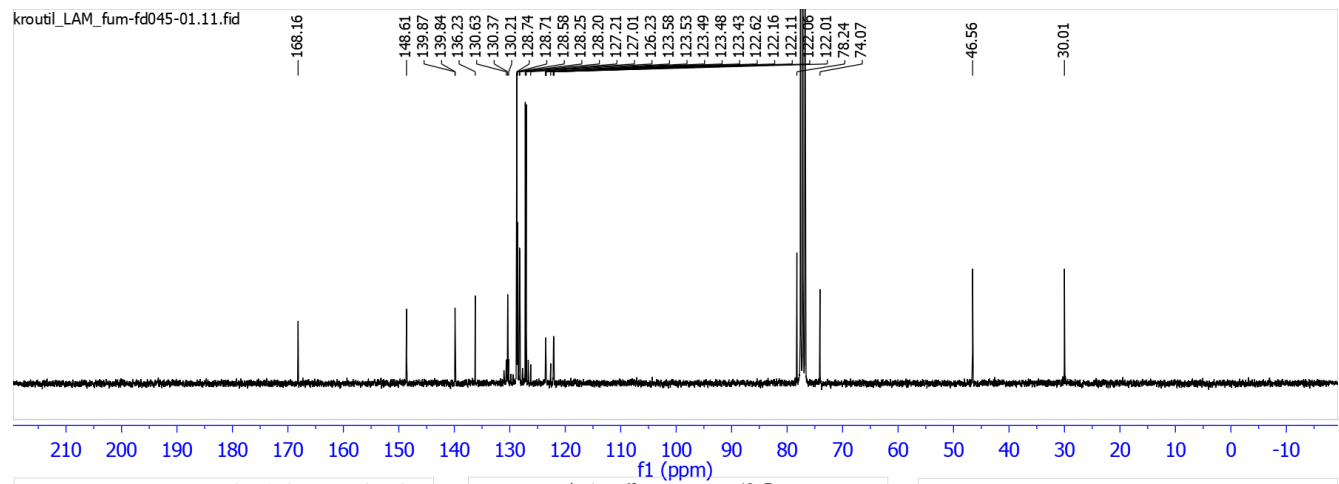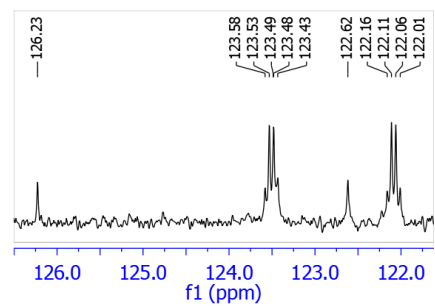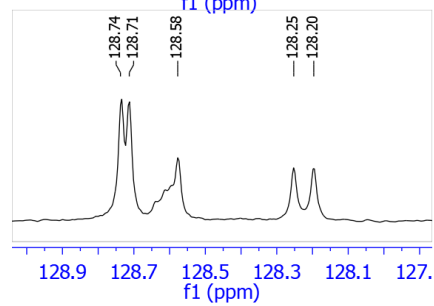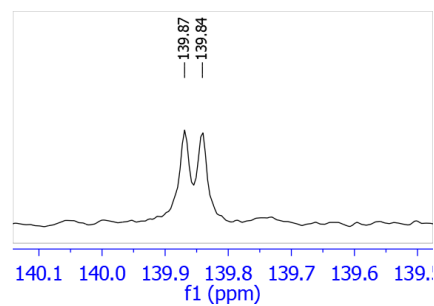

Benzhydryl 4-hydroxy-4-(4-methoxyphenyl)-2-methylenepentanoate (**8h**) in CDCl<sub>3</sub> @ 300.13 MHz (<sup>1</sup>H) and 75.47 MHz (<sup>13</sup>C).

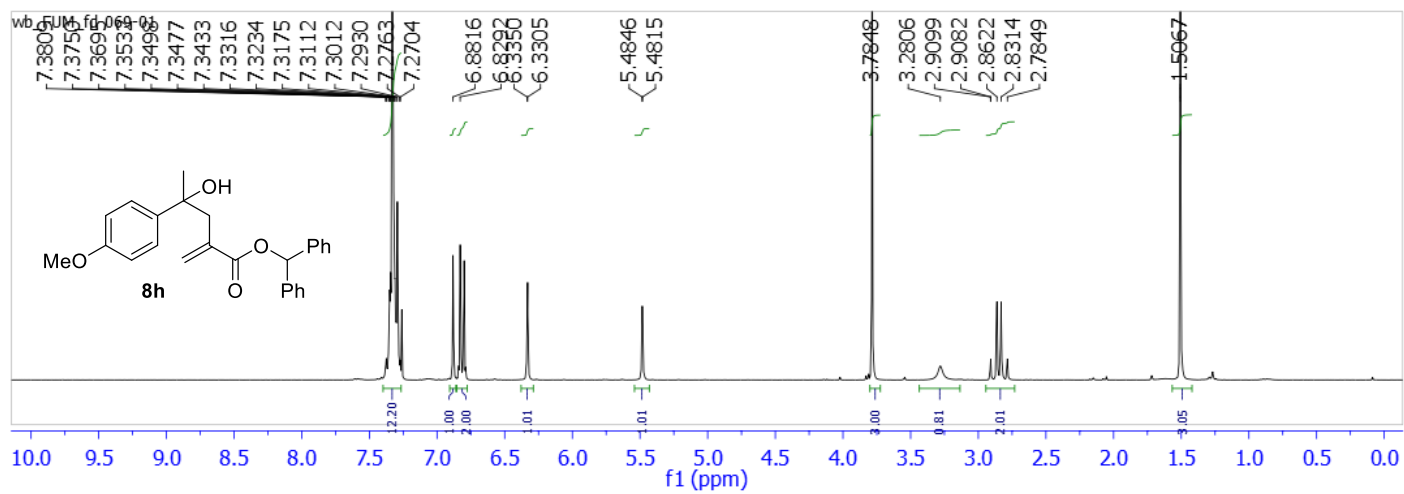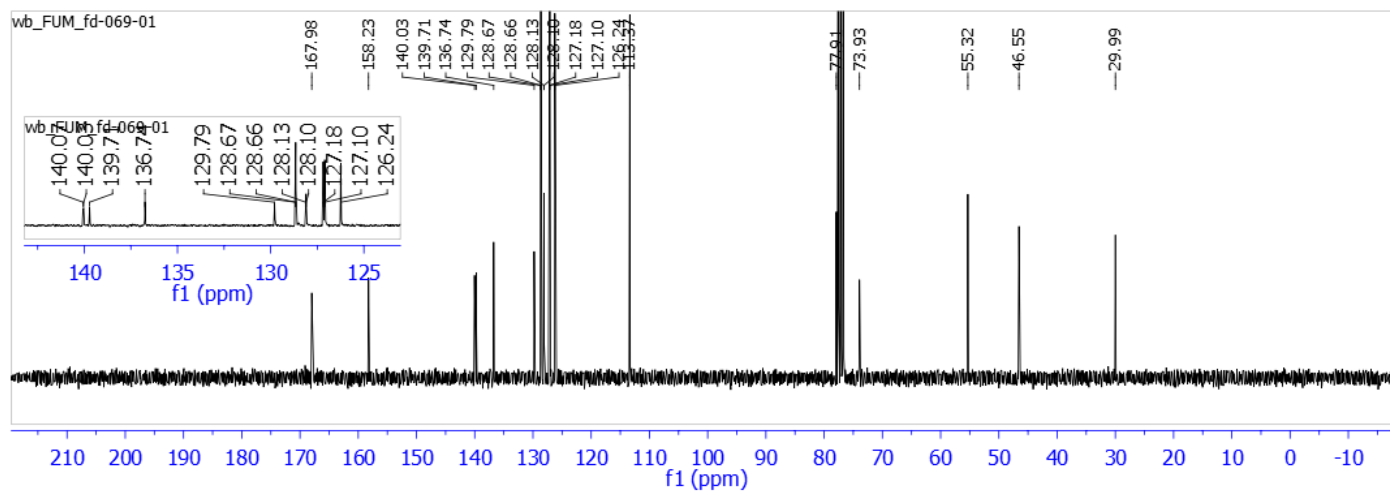

Benzhydryl 4-hydroxy-4-(3-methoxyphenyl)-2-methylenepentanoate (**8i**) in CDCl<sub>3</sub> @ 300.13 MHz (<sup>1</sup>H) and 75.47 MHz (<sup>13</sup>C).

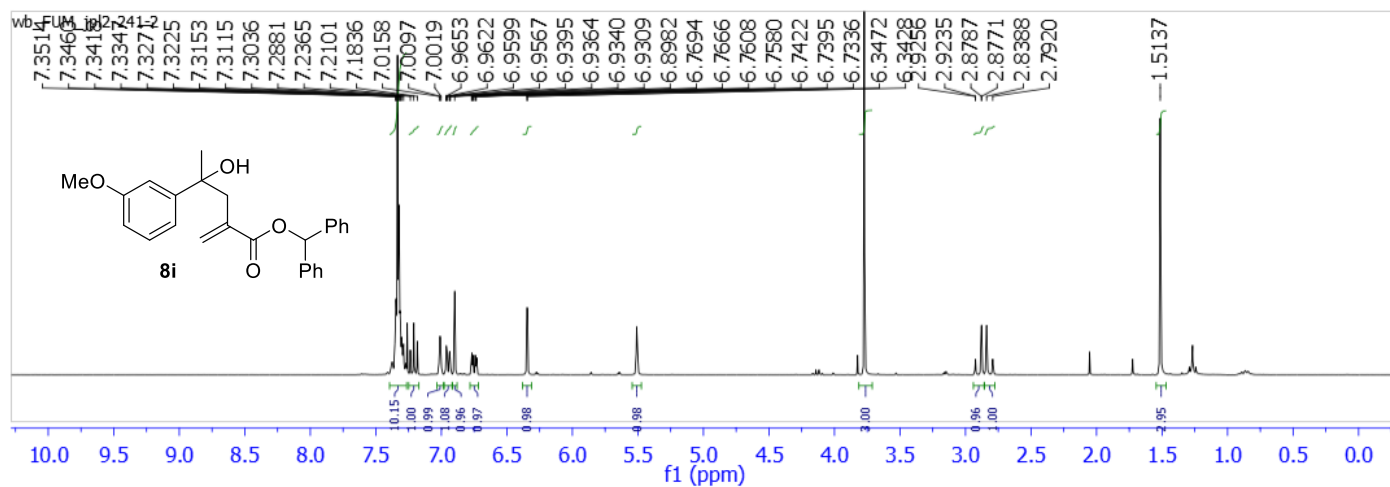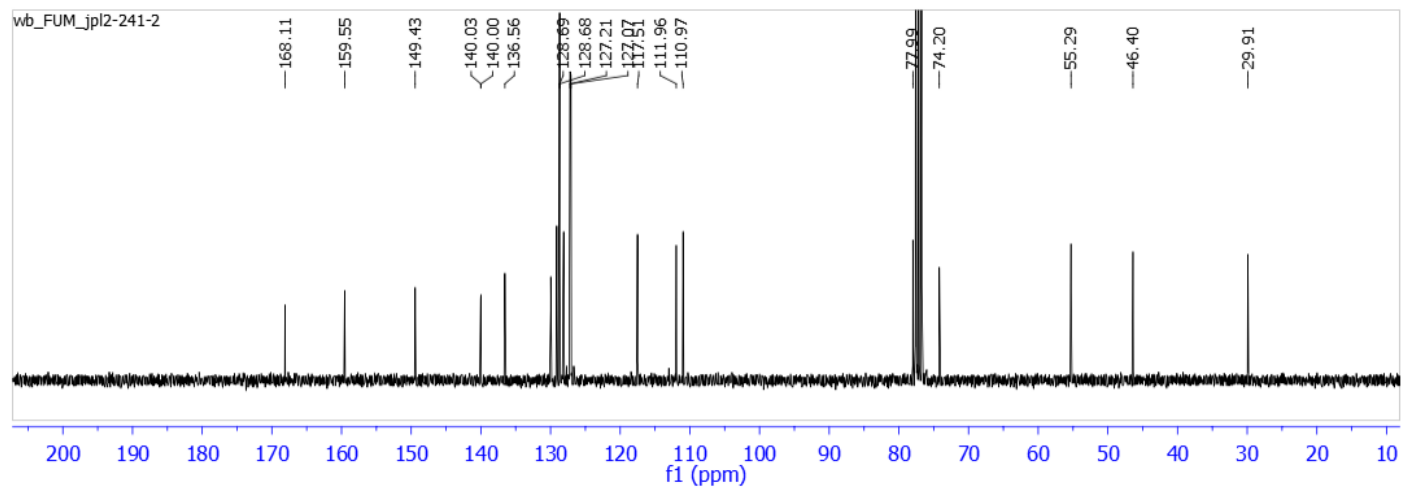

Benzhydryl 4-hydroxy-4-(2-methoxyphenyl)-2-methylenepentanoate (**8j**) in CDCl<sub>3</sub> @ 300.13 MHz (<sup>1</sup>H) and 75.47 MHz (<sup>13</sup>C).

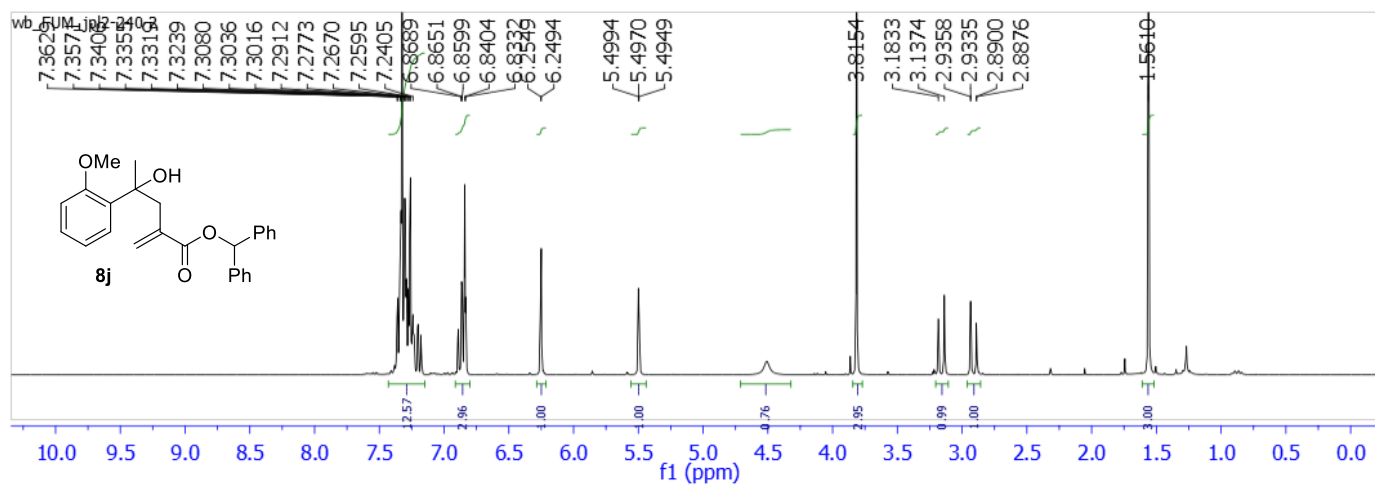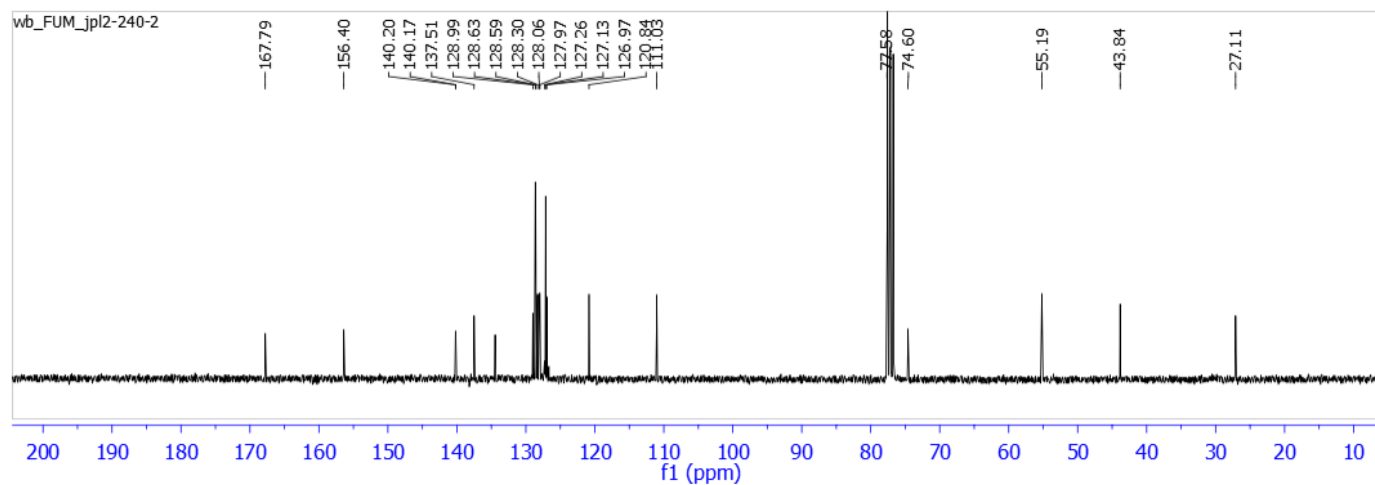

Benzhydryl 4-hydroxy-2-methylene-4-phenylhexanoate (**8k**) in CDCl<sub>3</sub> @ 300.13 MHz (<sup>1</sup>H) and 75.47 MHz (<sup>13</sup>C).

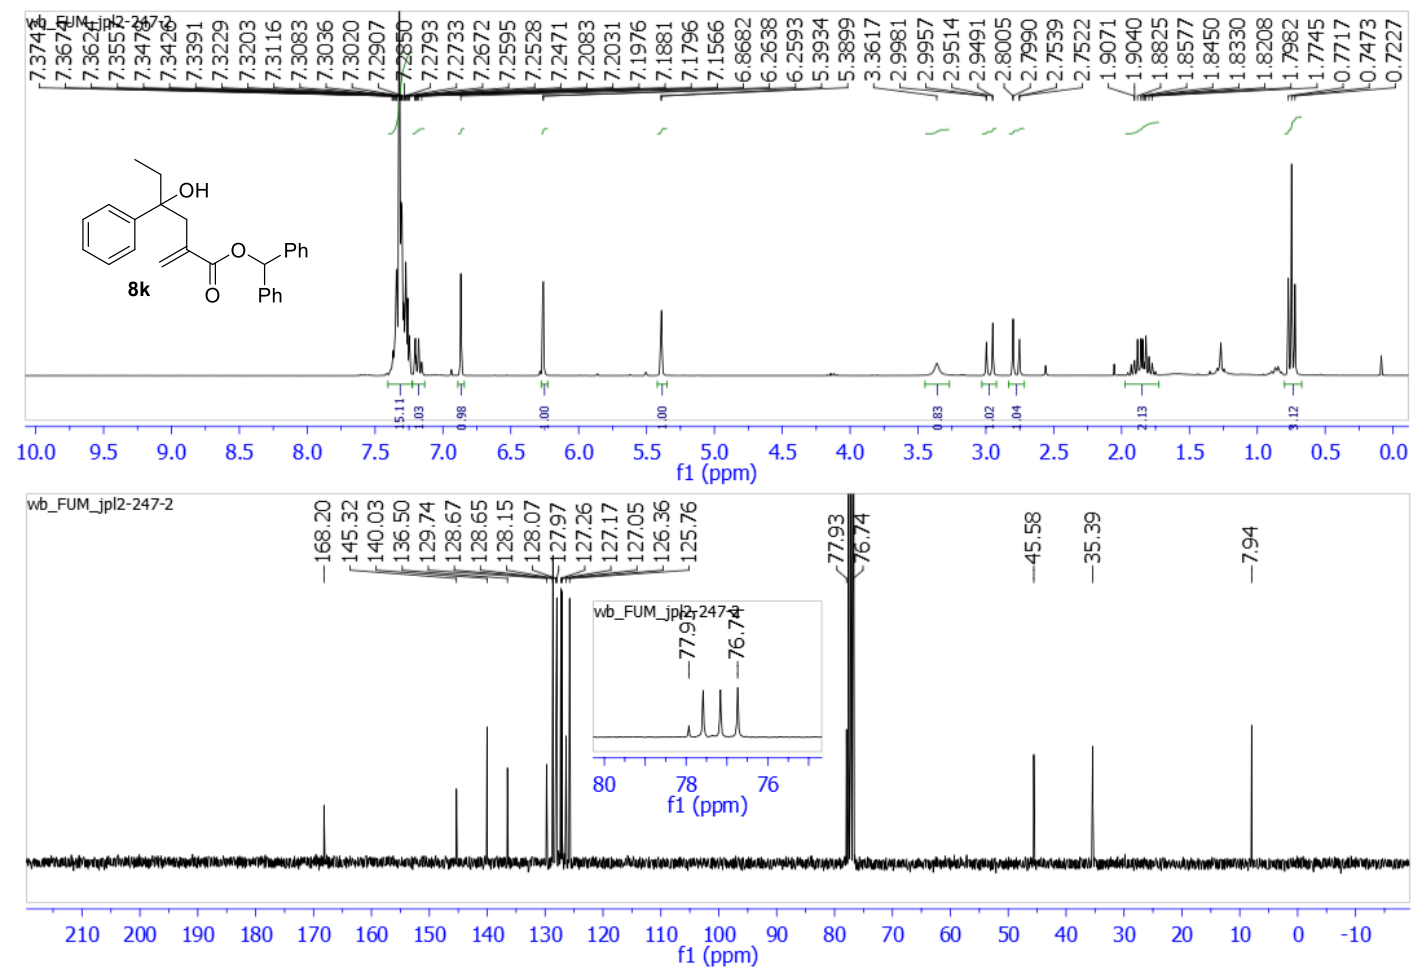

Benzhydryl 4-hydroxy-2-methylene-4-phenylheptanoate (**81**) in CDCl<sub>3</sub> @ 300.13 MHz (<sup>1</sup>H) and 75.47 MHz (<sup>13</sup>C).

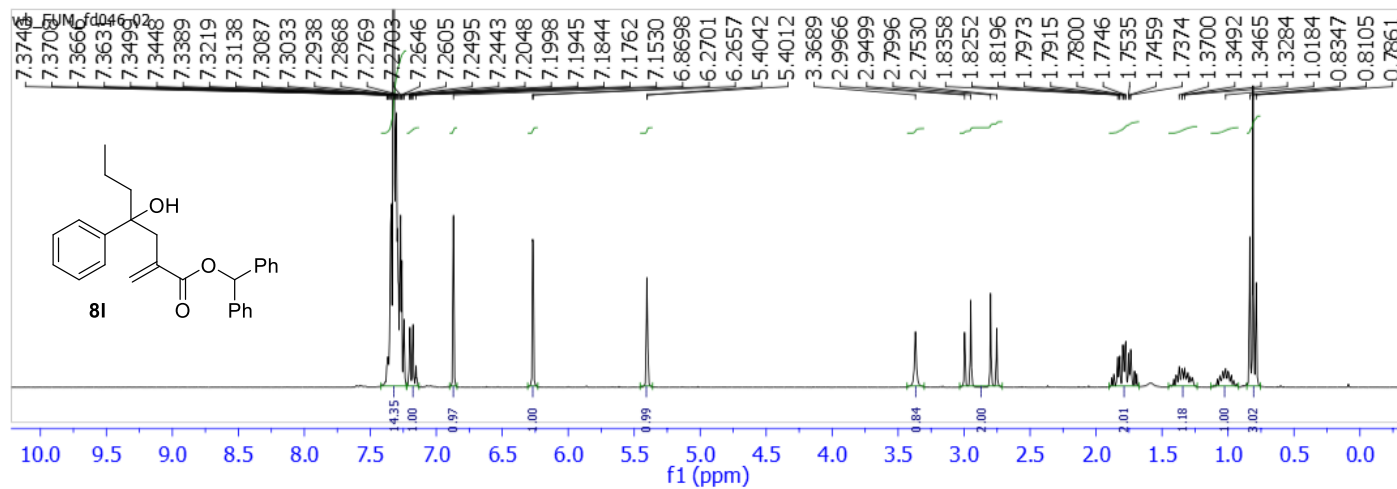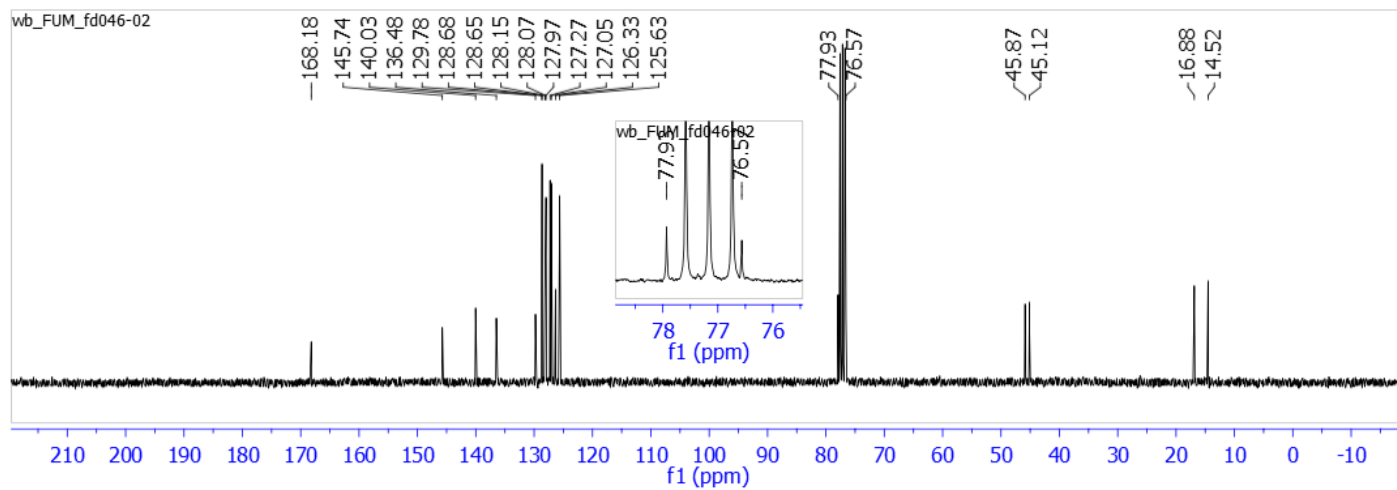

Benzhydryl 2-[(1-hydroxy-1,2,3,4-tetrahydronaphthalen-1-yl)methyl]acrylate (**8m**) in CDCl<sub>3</sub> @ 300.13 MHz (<sup>1</sup>H) and 75.47 MHz (<sup>13</sup>C).

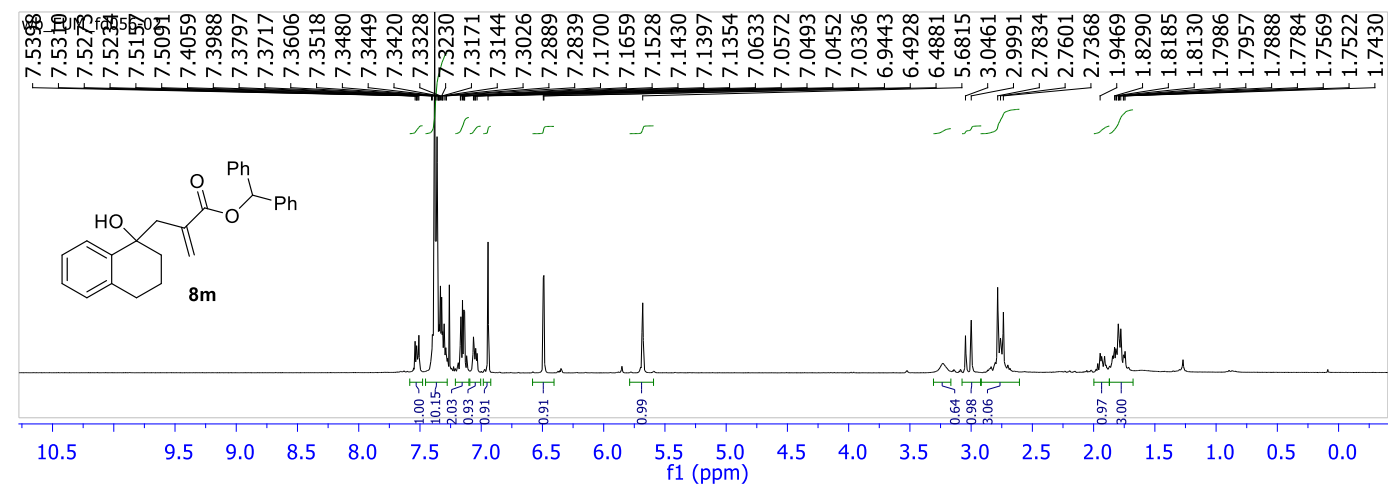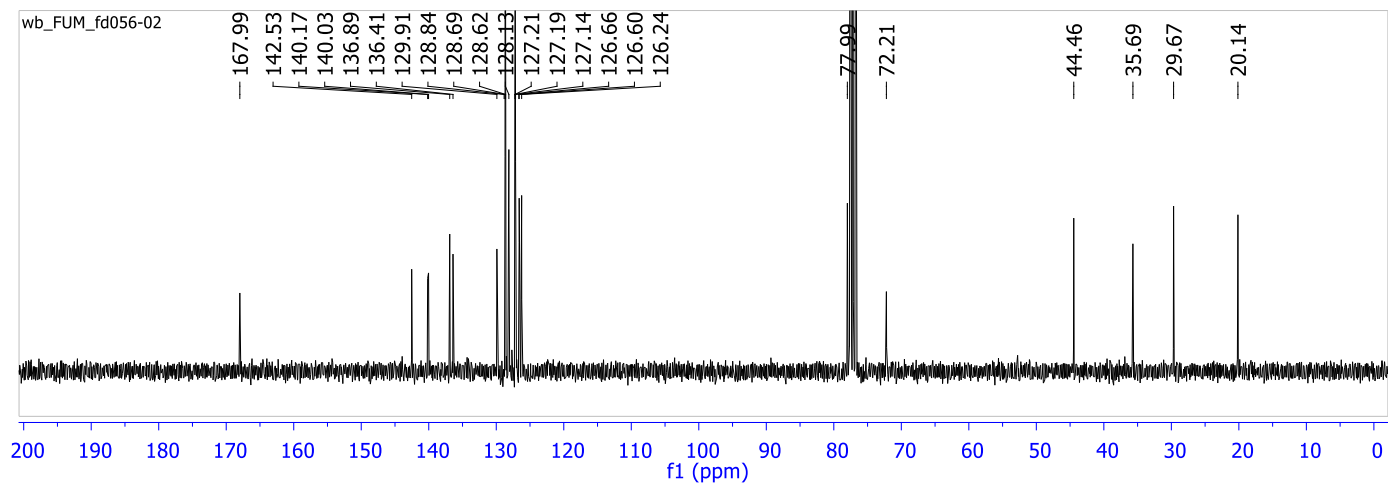

Benzhydryl 2-[(4-hydroxychroman-4-yl)methyl]acrylate (**8n**) in CDCl<sub>3</sub> @ 300.13 MHz (<sup>1</sup>H) and 75.47 MHz (<sup>13</sup>C).

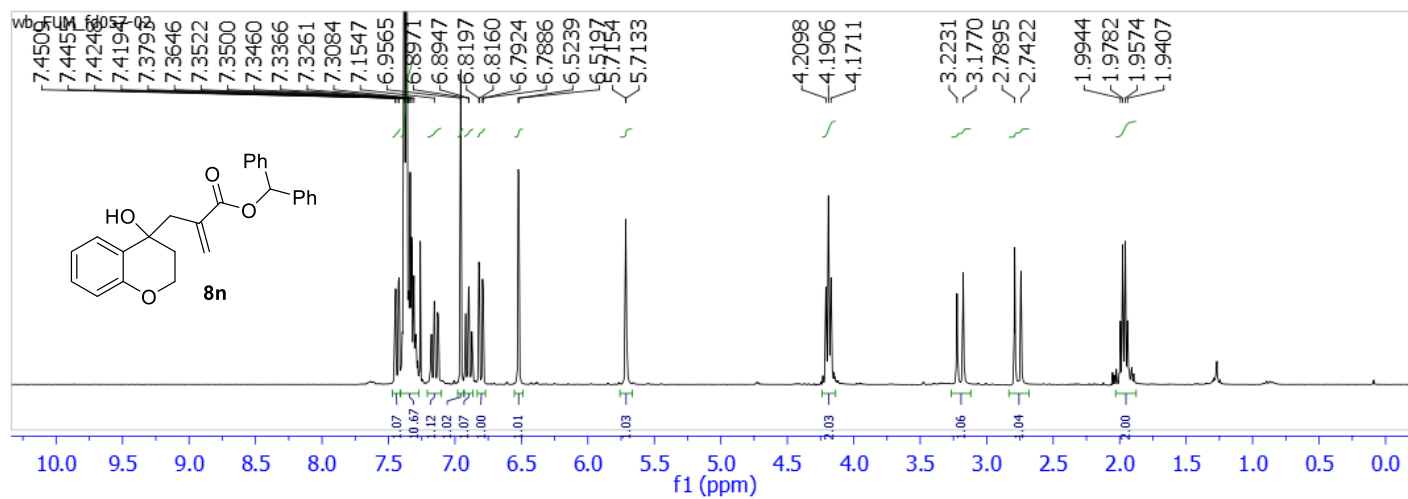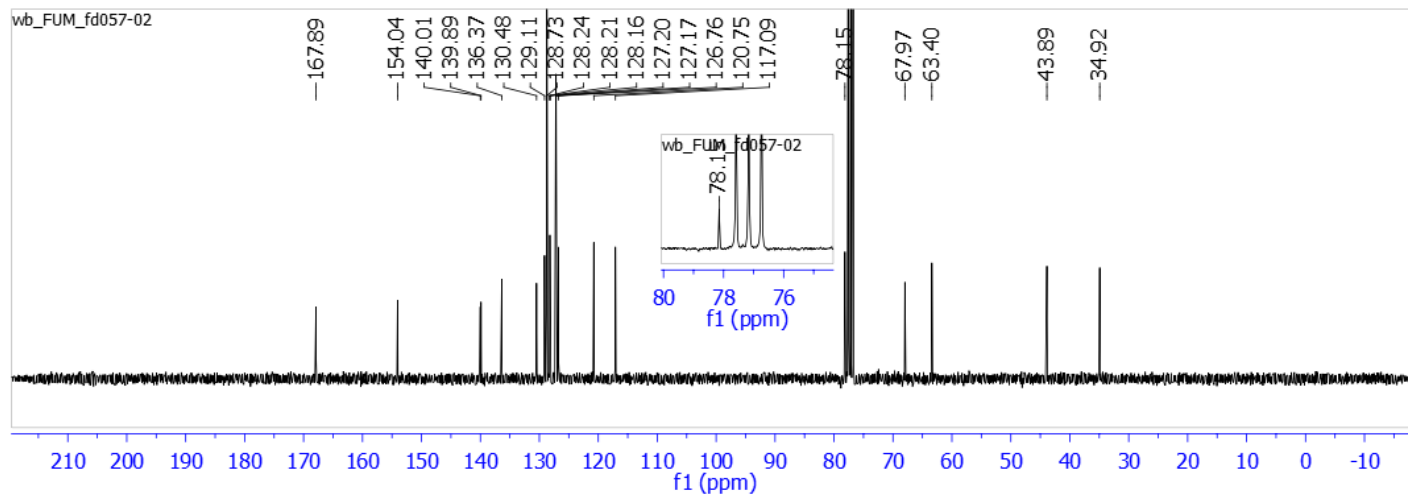



Benzhydryl 2-[(6-chloro-4-hydroxychroman-4-yl)methyl]acrylate (**8o**) in CDCl<sub>3</sub> @ 300.13 MHz (<sup>1</sup>H) and 75.47 MHz (<sup>13</sup>C).

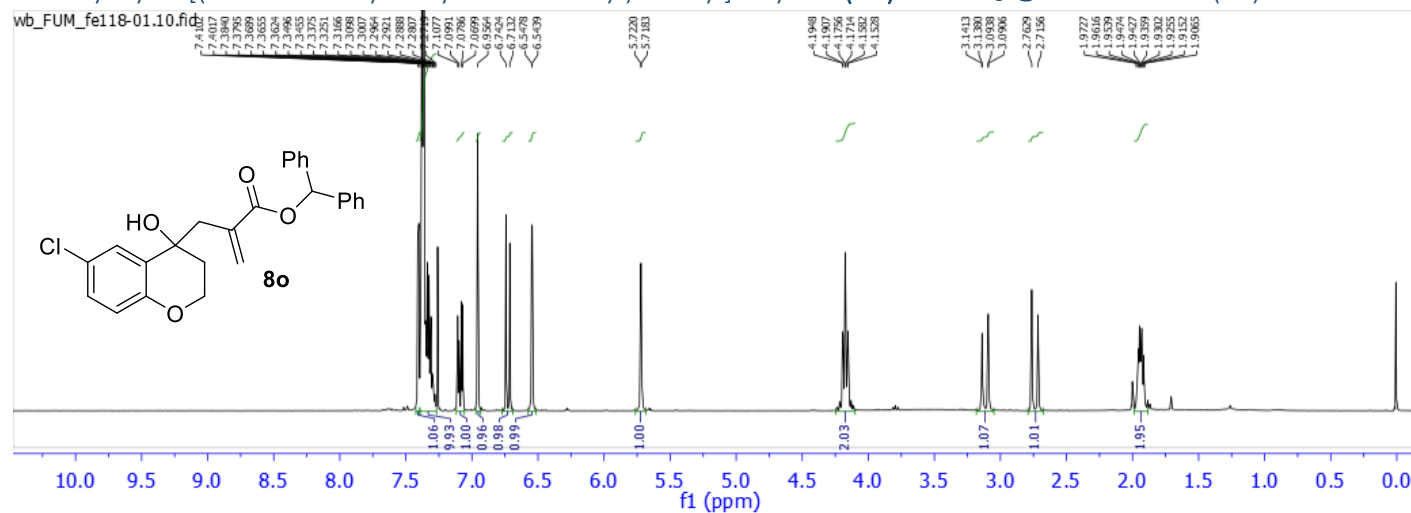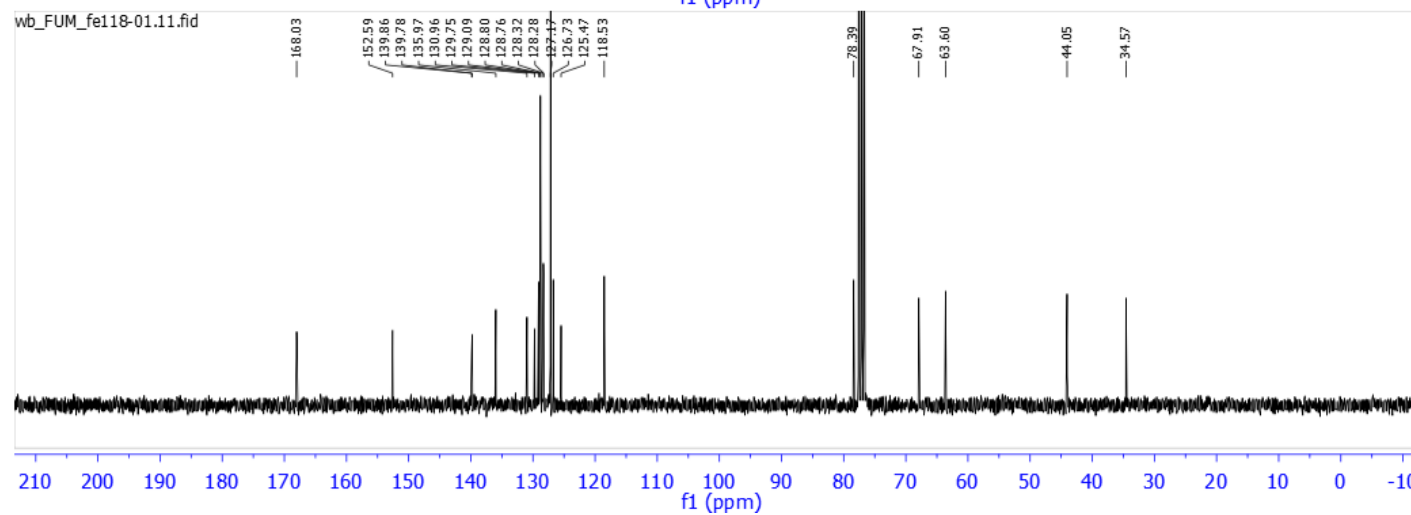

Benzhydryl (*E*)-4-hydroxy-4-methyl-2-methylene-6-phenylhex-5-enoate (**8p**) in CDCl<sub>3</sub> @ 300.13 MHz (<sup>1</sup>H) and 75.47 MHz (<sup>13</sup>C).

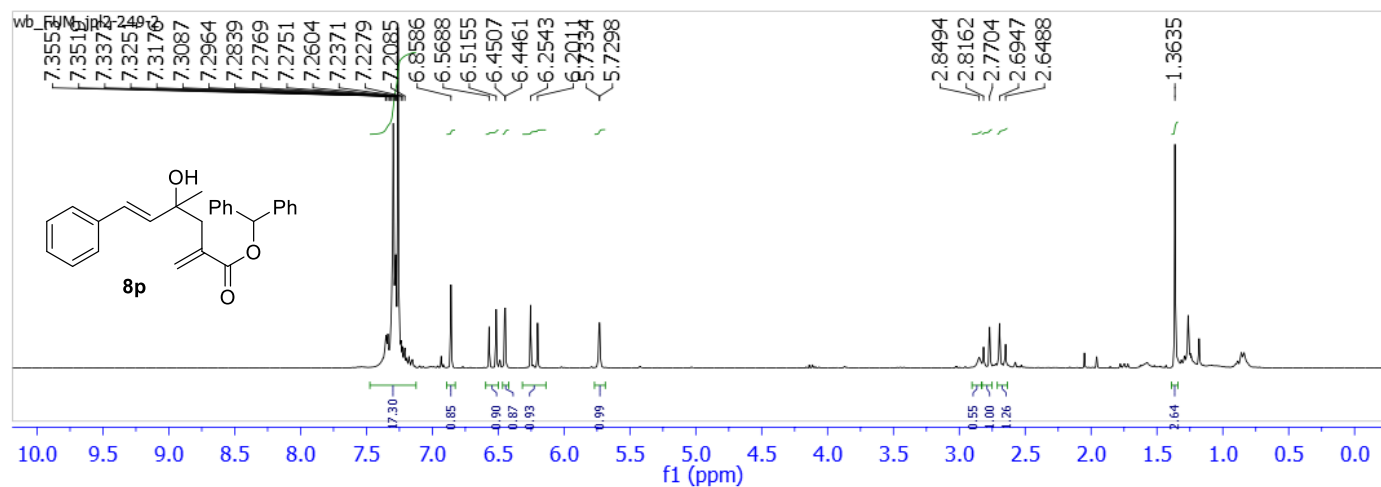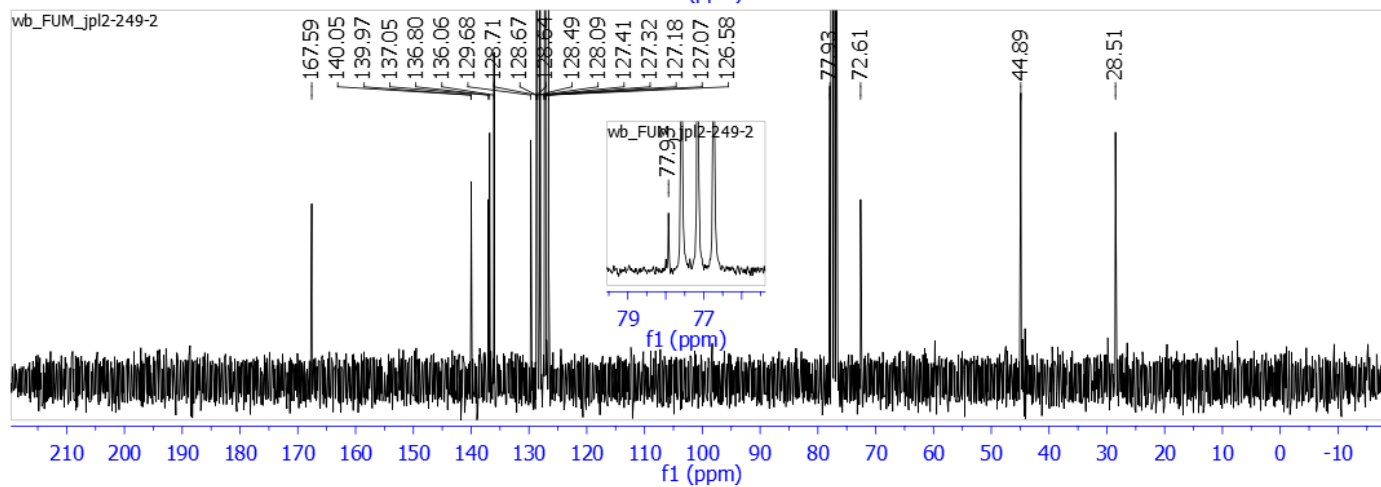

Benzhydryl 4-(4-bromophenyl)-4-hydroxy-3-methyl-2-methylenepentanoate (**8q**) in CDCl<sub>3</sub> @ 300.13 MHz (<sup>1</sup>H) and 75.47 MHz (<sup>13</sup>C).

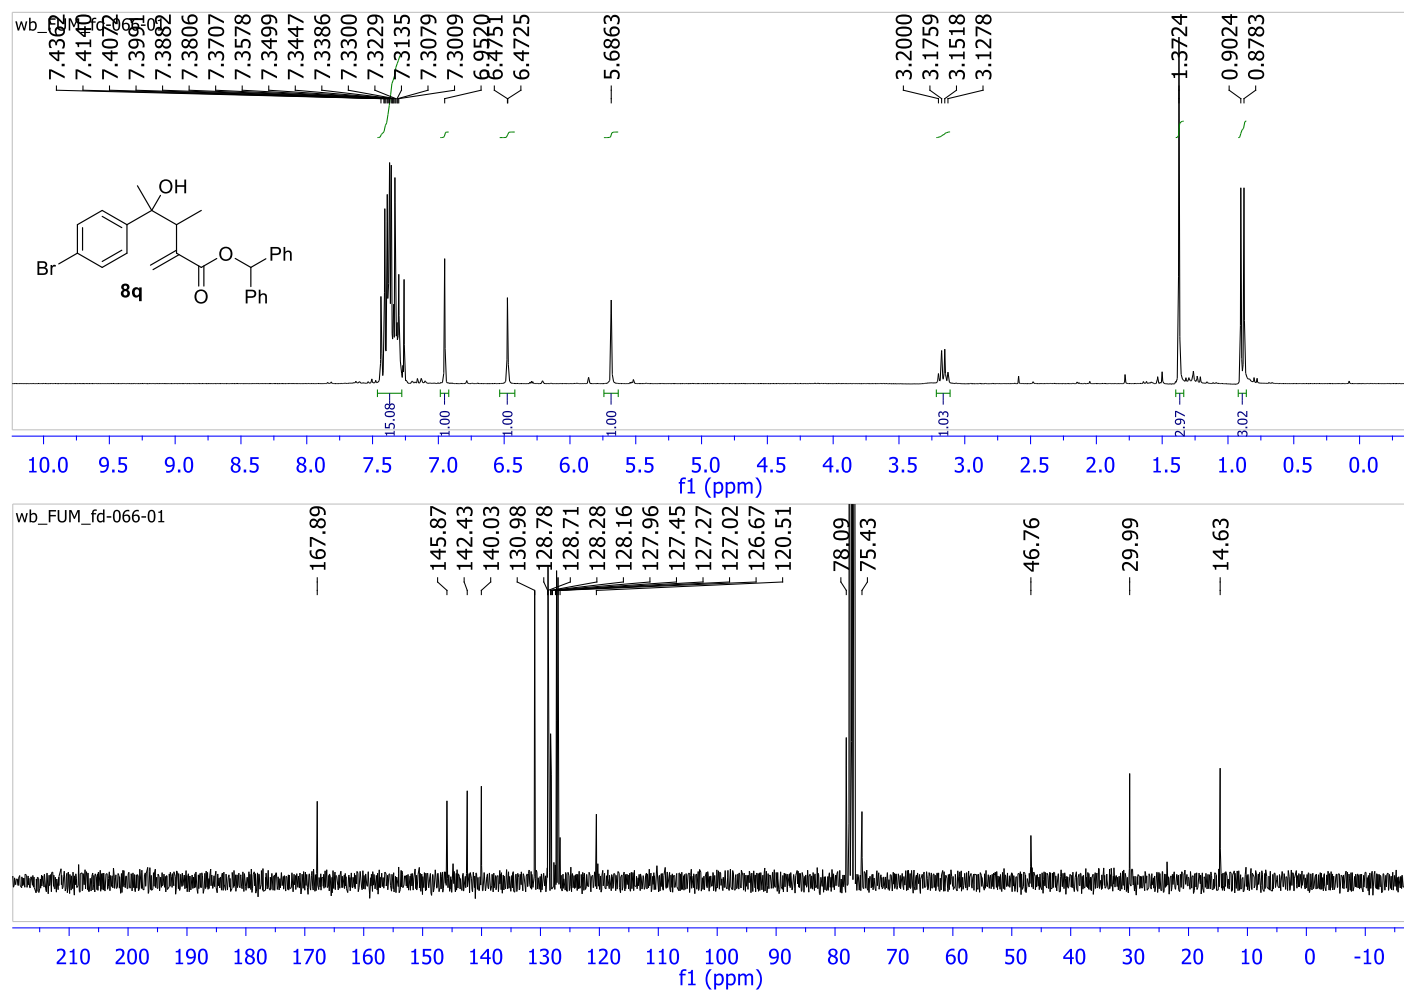

(*R*)-6-chloro-4'-methylene-3',4'-dihydro-5'H-spiro[chromane-4,2'-furan]-5'-one (**10o**) in CDCl<sub>3</sub> @ 300.13 MHz (<sup>1</sup>H) and 75.47 MHz (<sup>13</sup>C).

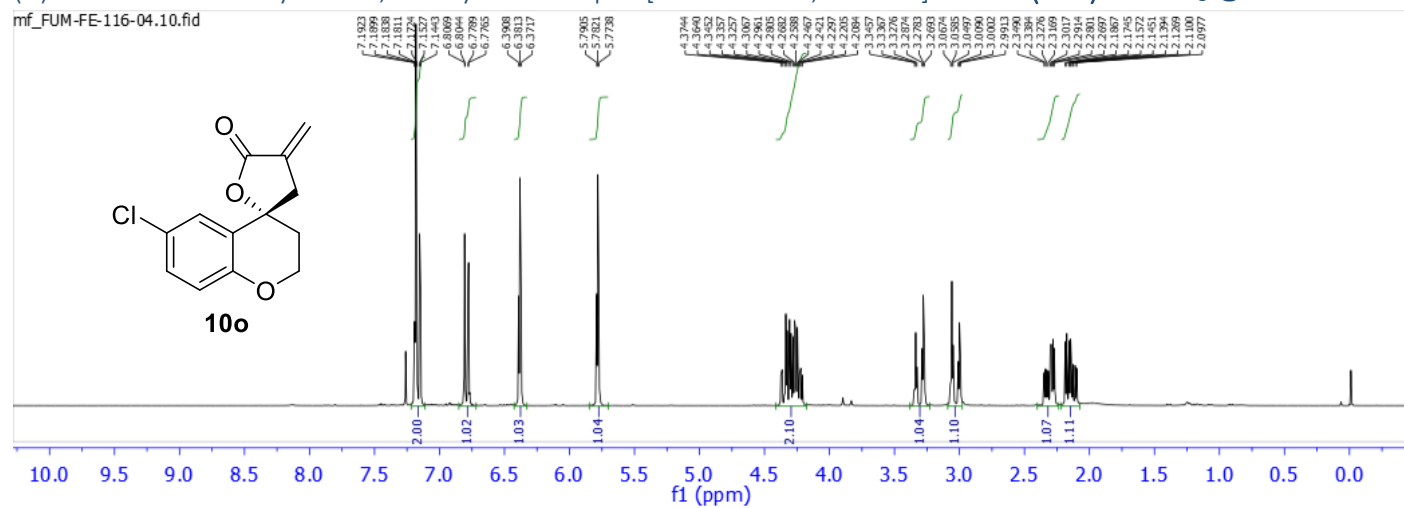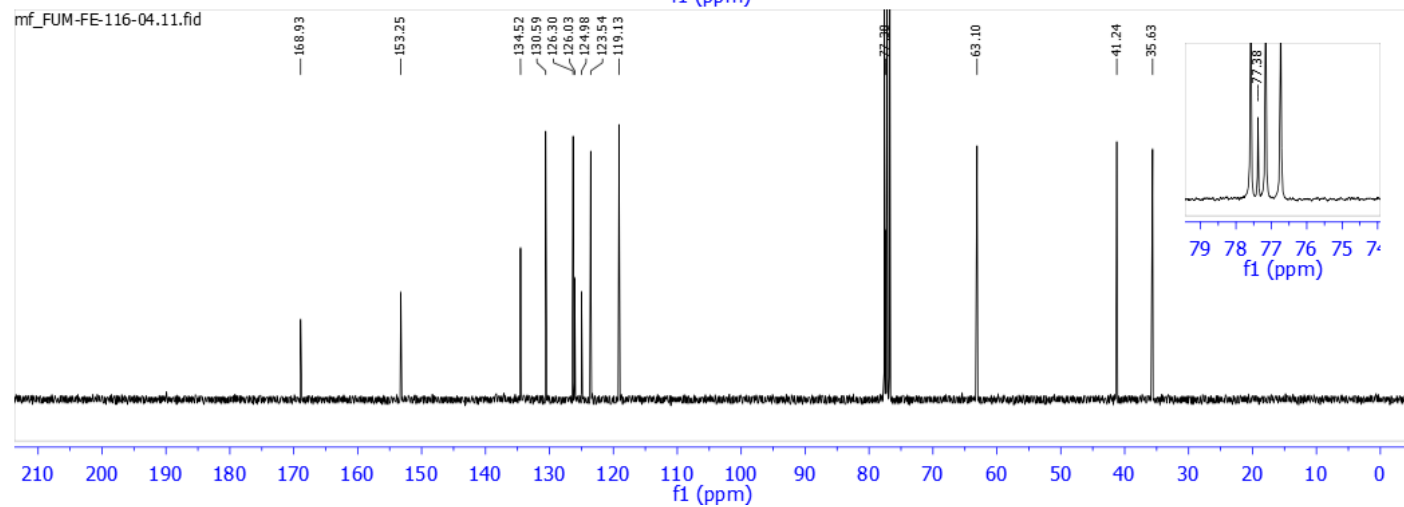

5-(4-bromophenyl)-4,5-dimethyl-3-methylenedihydrofuran-2(3H)-one (**10q**) in CDCl<sub>3</sub> @ 300.13 MHz (<sup>1</sup>H) and 75.47 MHz (<sup>13</sup>C).

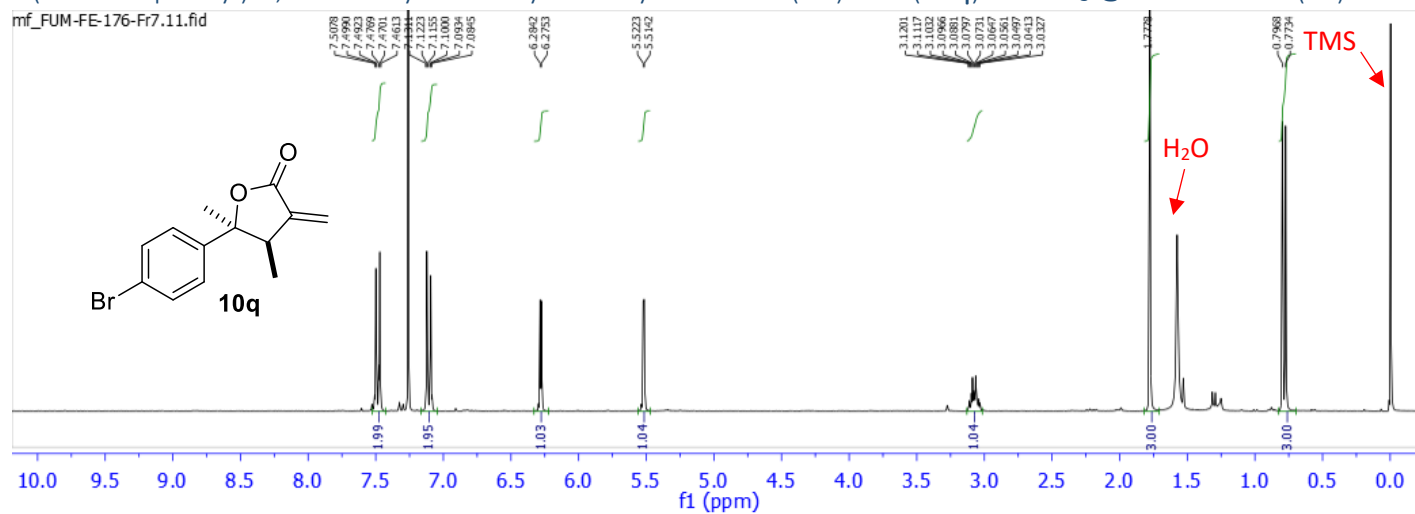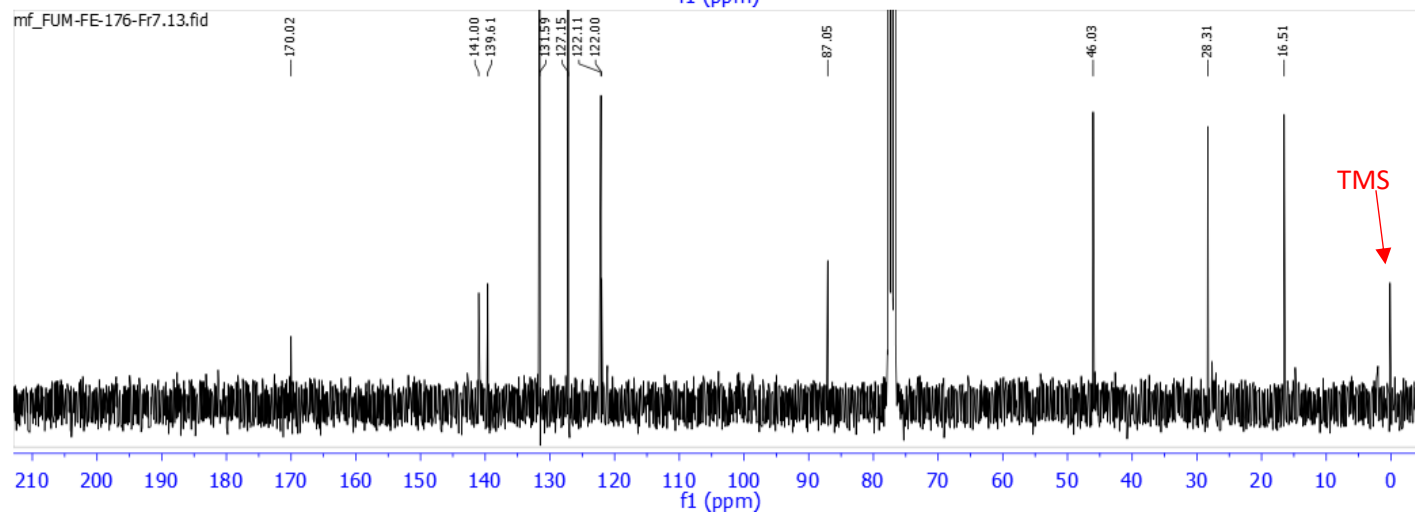

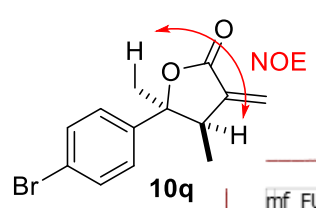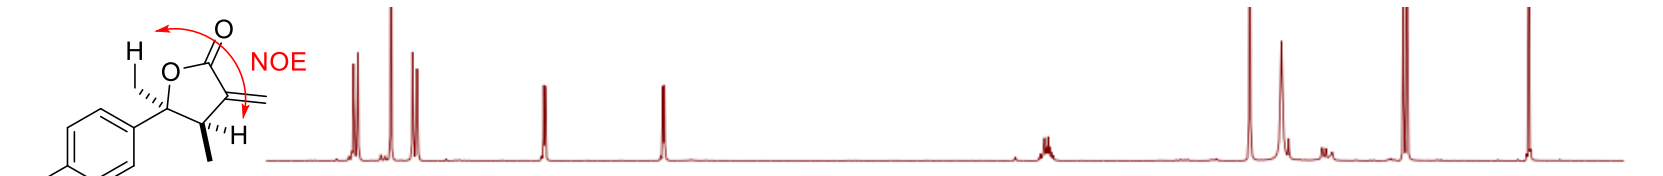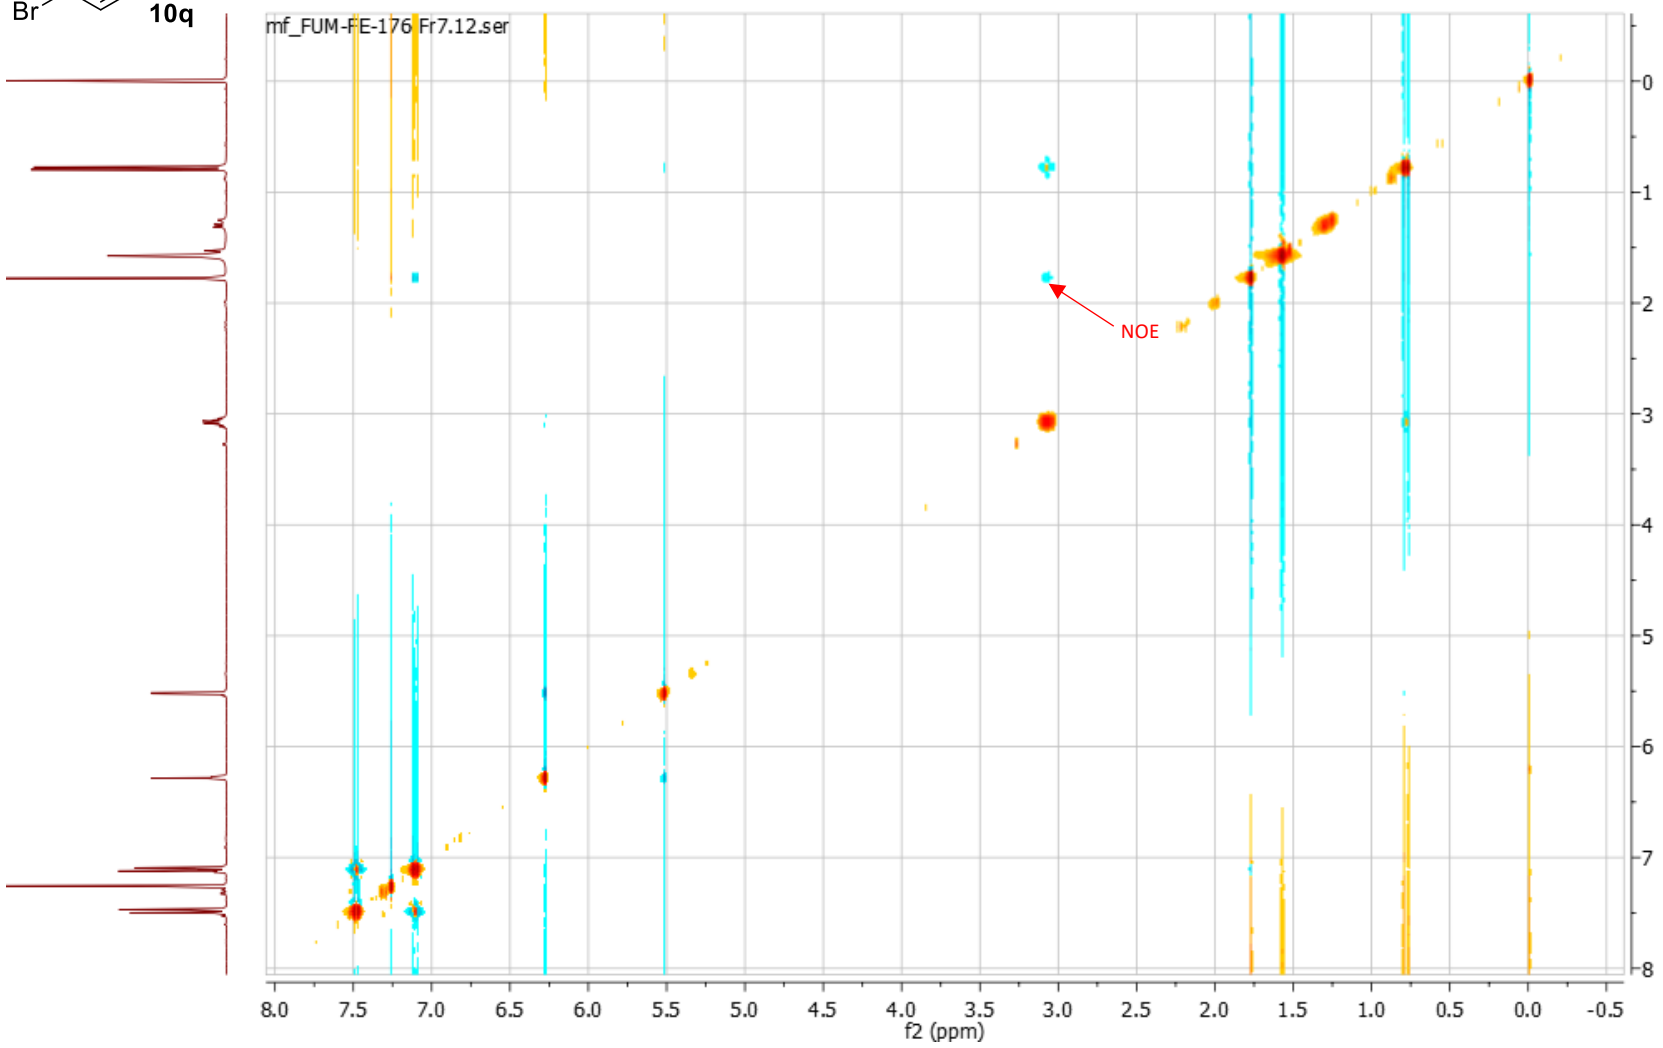

4-[(4-bromophenyl)(hydroxy)methyl]-3-methylenedihydrofuran-2(3H)-one (**19**) in CDCl<sub>3</sub> @ 300.13 MHz (<sup>1</sup>H) and 75.47 MHz (<sup>13</sup>C).

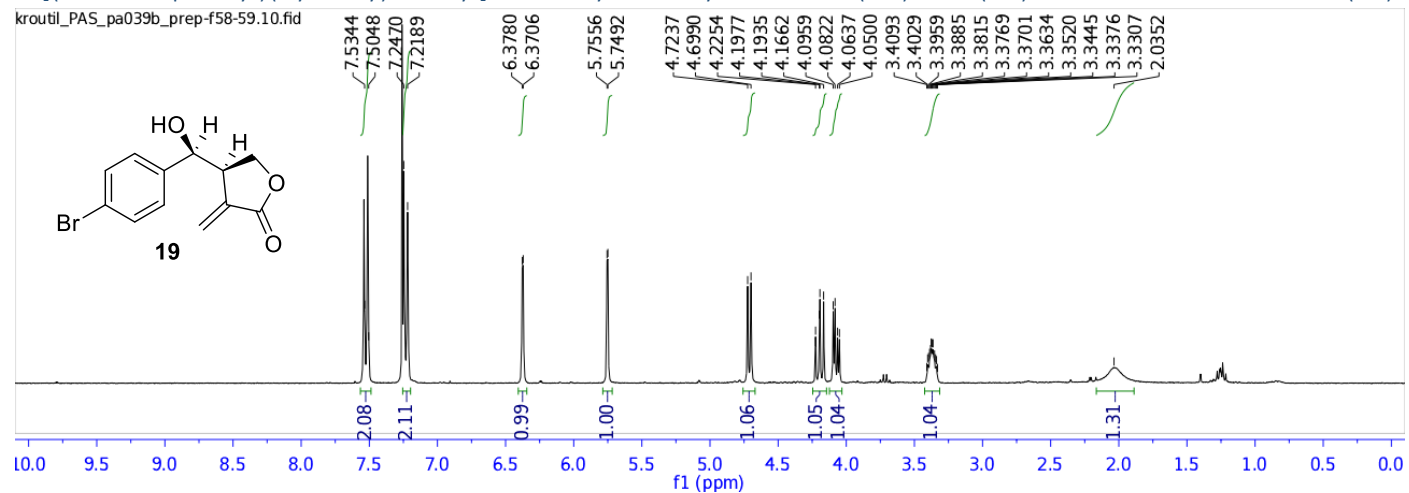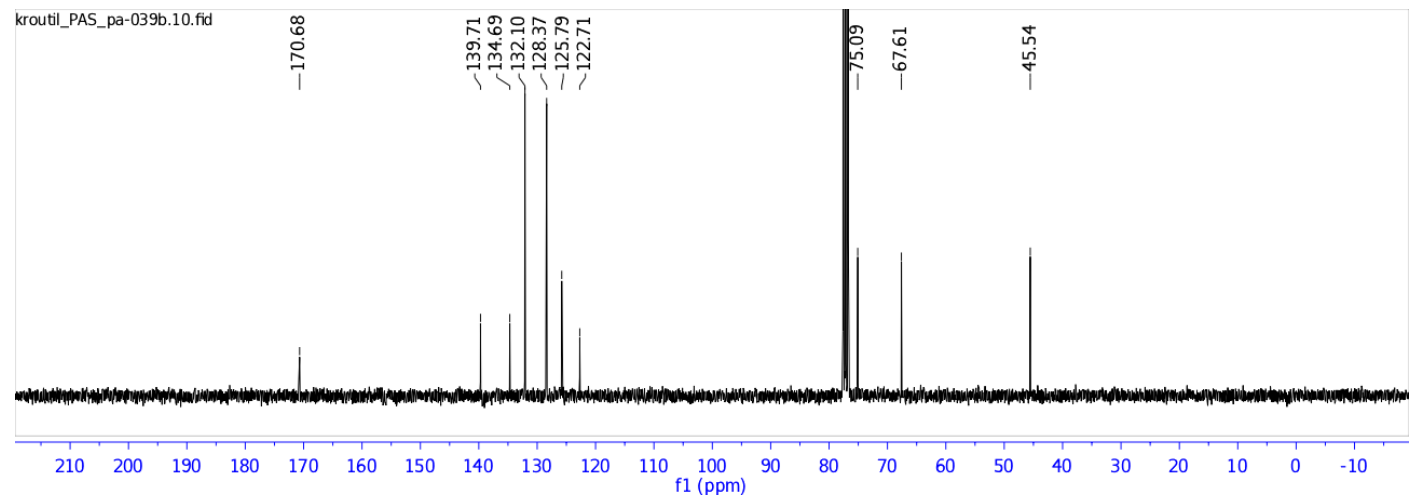

4-[1-(4-bromophenyl)-1-hydroxyethyl]-3-methylenedihydrofuran-2(3H)-one (**20**) in CDCl<sub>3</sub> @ 300.13 MHz (<sup>1</sup>H) and 75.47 MHz (<sup>13</sup>C).

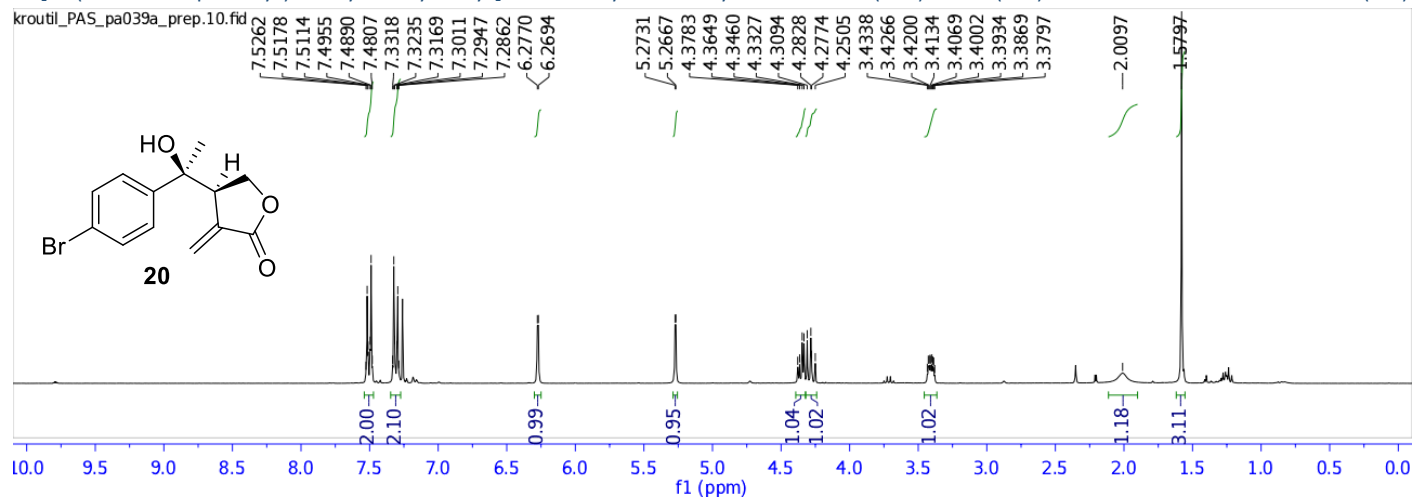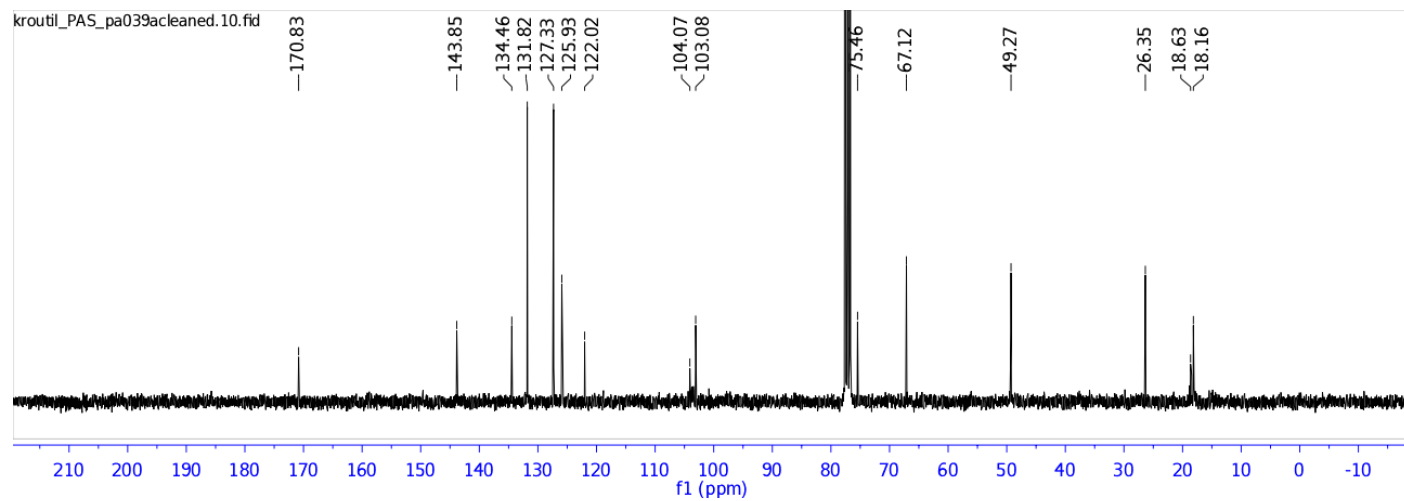



*N,N*-dibenzyl-4-hydroxy-2-methylene-4-phenylpentanamide (**8r**):

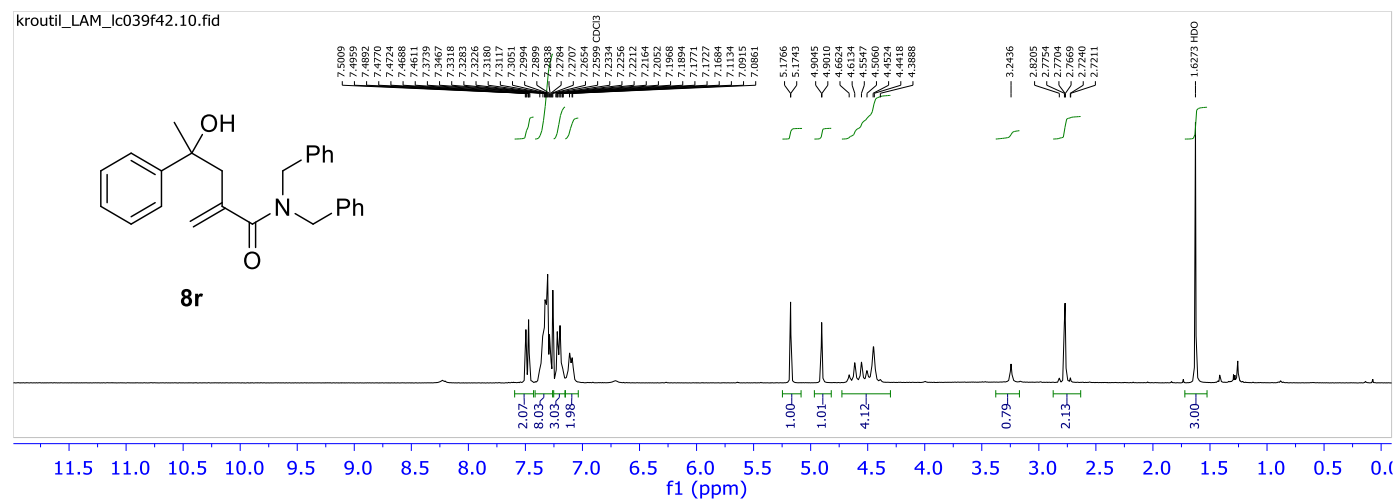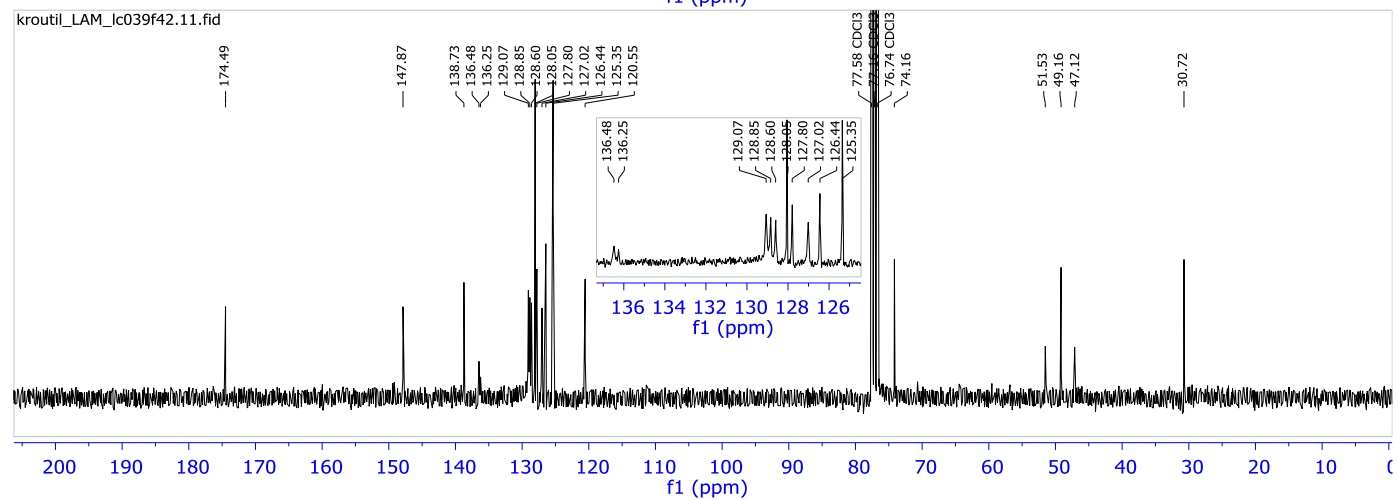

## HPLC chromatograms

Benzhydryl 4-hydroxy-2-methylene-4-phenylpentanoate (**8e**).

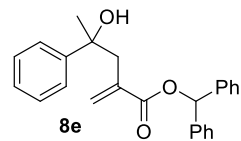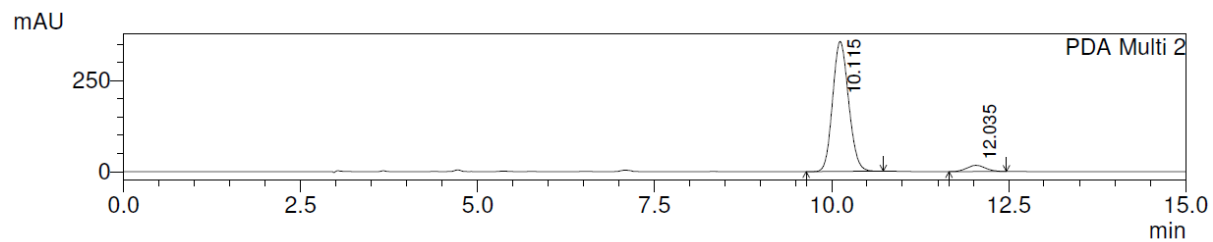

PeakTable

| Peak# | Ret. Time | Area    | Height | Area %  | Height % |
|-------|-----------|---------|--------|---------|----------|
| 1     | 10.115    | 5611474 | 357534 | 94.752  | 95.497   |
| 2     | 12.035    | 310810  | 16859  | 5.248   | 4.503    |
| Total |           | 5922284 | 374394 | 100.000 | 100.000  |

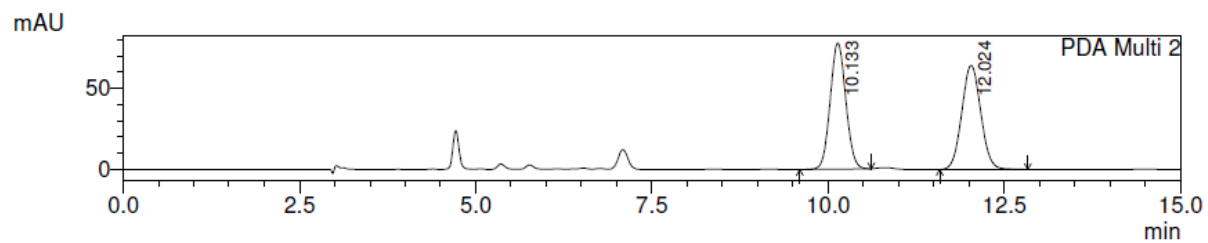

PeakTable

| Peak# | Ret. Time | Area    | Height | Area %  | Height % |
|-------|-----------|---------|--------|---------|----------|
| 1     | 10.133    | 1193124 | 77491  | 49.851  | 54.769   |
| 2     | 12.024    | 1200273 | 63995  | 50.149  | 45.231   |
| Total |           | 2393397 | 141485 | 100.000 | 100.000  |

Benzhydryl 4-(4-bromophenyl)-4-hydroxy-2-methylenepentanoate (**8f**).

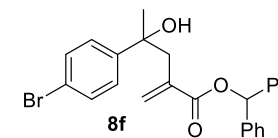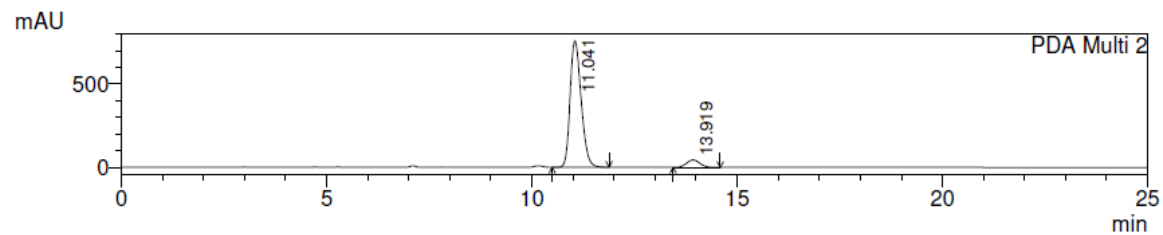

PeakTable

| Peak# | Ret. Time | Area     | Height | Area %  | Height % |
|-------|-----------|----------|--------|---------|----------|
| 1     | 11.041    | 14201746 | 759697 | 93.514  | 94.525   |
| 2     | 13.919    | 985047   | 44002  | 6.486   | 5.475    |
| Total |           | 15186793 | 803698 | 100.000 | 100.000  |

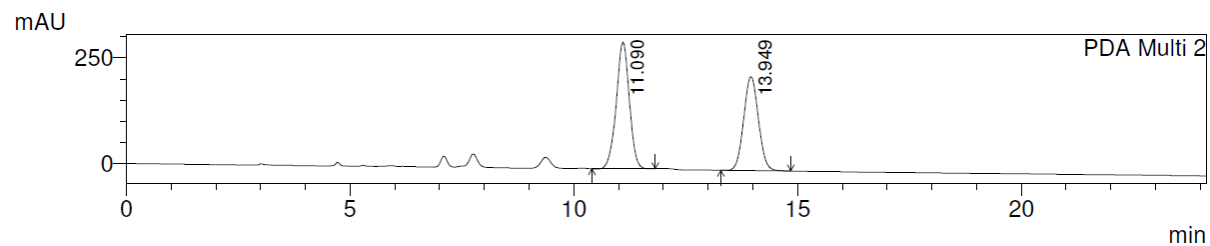

PeakTable

| Peak# | Ret. Time | Area     | Height | Area %  | Height % |
|-------|-----------|----------|--------|---------|----------|
| 1     | 11.090    | 6086907  | 299540 | 54.342  | 57.356   |
| 2     | 13.949    | 5114302  | 222703 | 45.658  | 42.644   |
| Total |           | 11201209 | 522243 | 100.000 | 100.000  |

Benzhydryl 4-hydroxy-2-methylene-4-[4-(trifluoromethyl)phenyl]pentanoate (**8g**).

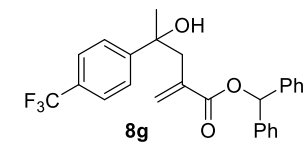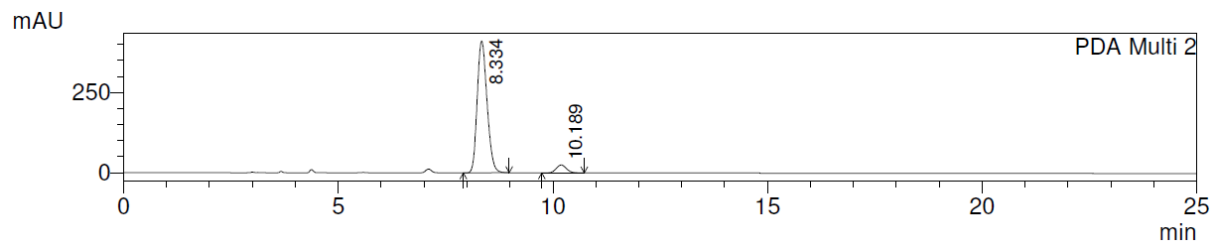

PeakTable

PDA Ch2 230nm 4nm

| Peak# | Ret. Time | Area    | Height | Area %  | Height % |
|-------|-----------|---------|--------|---------|----------|
| 1     | 8.334     | 6560499 | 410990 | 94.153  | 94.310   |
| 2     | 10.189    | 407421  | 24797  | 5.847   | 5.690    |
| Total |           | 6967920 | 435787 | 100.000 | 100.000  |

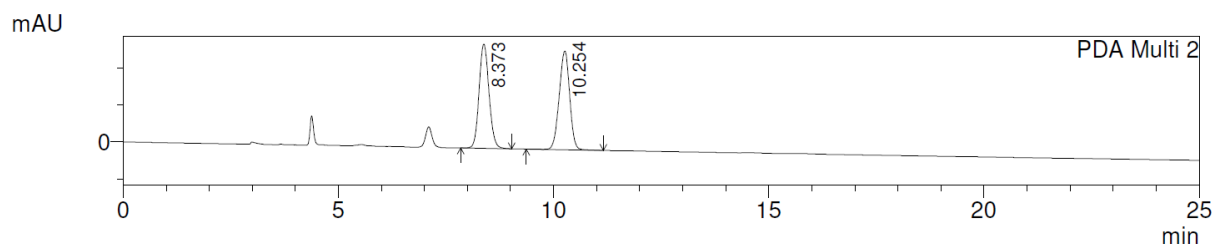

PeakTable

PDA Ch2 230nm 4nm

| Peak# | Ret. Time | Area    | Height | Area %  | Height % |
|-------|-----------|---------|--------|---------|----------|
| 1     | 8.373     | 2258385 | 140588 | 50.074  | 51.317   |
| 2     | 10.254    | 2251707 | 133372 | 49.926  | 48.683   |
| Total |           | 4510092 | 273960 | 100.000 | 100.000  |

Benzhydryl 4-hydroxy-4-(4-methoxyphenyl)-2-methylenepentanoate (**8h**).

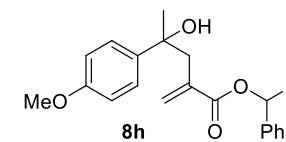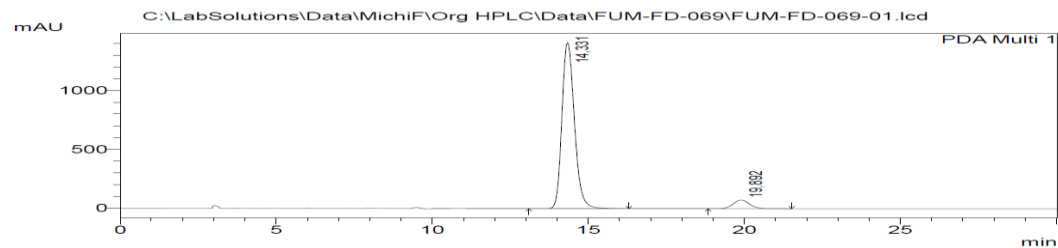

PeakTable

| Peak# | Ret. Time | Area     | Height  | Area %  | Height % |
|-------|-----------|----------|---------|---------|----------|
| 1     | 14.331    | 39311883 | 1410163 | 93.531  | 94.990   |
| 2     | 19.892    | 2719197  | 74371   | 6.469   | 5.010    |
| Total |           | 42031081 | 1484534 | 100.000 | 100.000  |

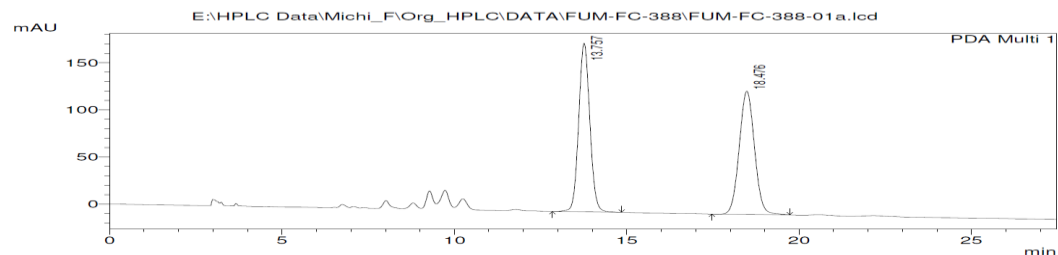

PeakTable

| Peak# | Ret. Time | Area    | Height | Area %  | Height % |
|-------|-----------|---------|--------|---------|----------|
| 1     | 13.757    | 4032354 | 179012 | 50.039  | 57.775   |
| 2     | 18.476    | 4026087 | 130829 | 49.961  | 42.225   |
| Total |           | 8058441 | 309841 | 100.000 | 100.000  |

Benzhydryl 4-hydroxy-4-(3-methoxyphenyl)-2-methylenepentanoate (**8i**).

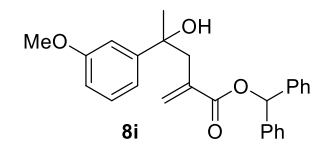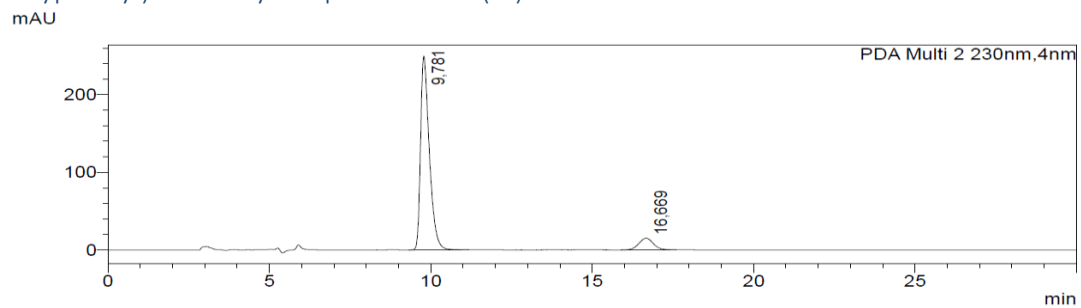

| PDA Ch2 230nm |           |      |         |        |         |
|---------------|-----------|------|---------|--------|---------|
| Peak#         | Ret. Time | Name | Area    | Height | Area%   |
| 1             | 9.781     |      | 4703597 | 249220 | 90.856  |
| 2             | 16.669    |      | 473409  | 15059  | 9.144   |
| Total         |           |      | 5177006 | 264280 | 100.000 |

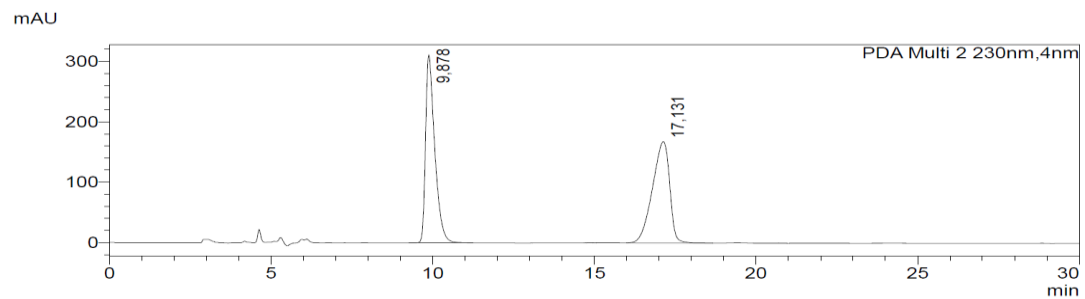

| PDA Ch2 230nm |           |      |          |        |         |
|---------------|-----------|------|----------|--------|---------|
| Peak#         | Ret. Time | Name | Area     | Height | Area%   |
| 1             | 9.878     |      | 6145262  | 310808 | 49.820  |
| 2             | 17.131    |      | 6189755  | 167775 | 50.180  |
| Total         |           |      | 12335018 | 478582 | 100.000 |

Benzhydryl 4-hydroxy-4-(2-methoxyphenyl)-2-methylenepentanoate (**8j**).

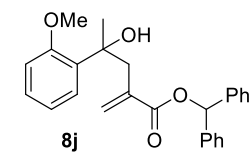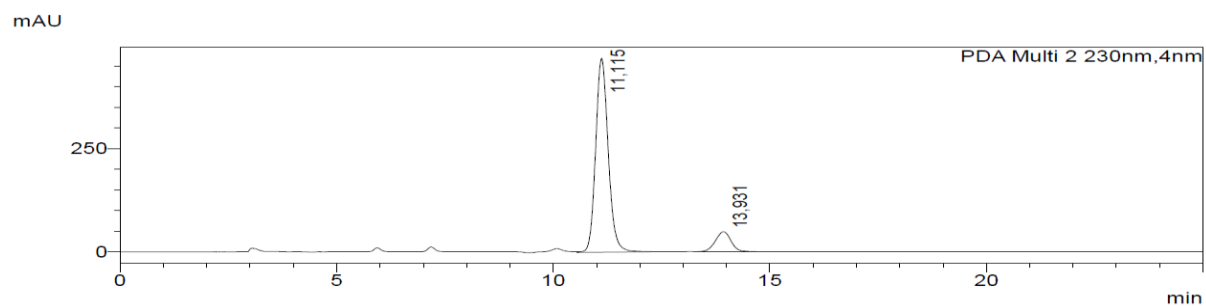

| PDA Ch2 230nm |           |      |          |        |         |
|---------------|-----------|------|----------|--------|---------|
| Peak#         | Ret. Time | Name | Area     | Height | Area%   |
| 1             | 11.115    |      | 9471125  | 468756 | 88.570  |
| 2             | 13.931    |      | 1222196  | 48329  | 11.430  |
| Total         |           |      | 10693322 | 517086 | 100.000 |

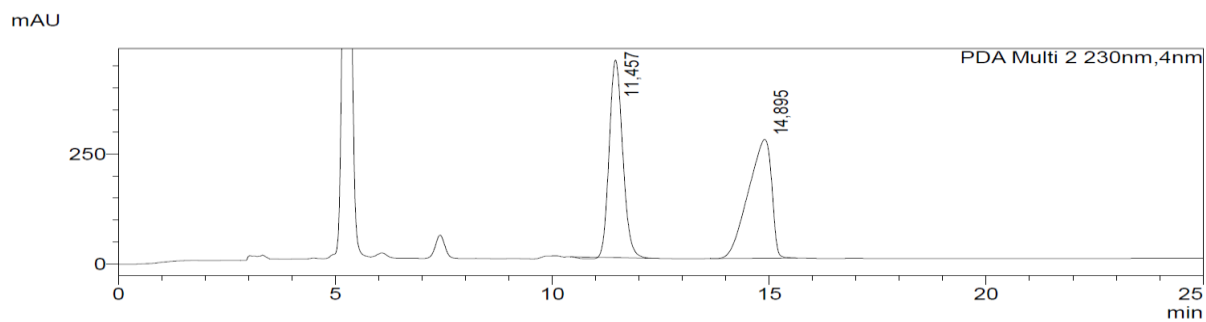

| PDA Ch2 230nm |           |      |          |        |         |
|---------------|-----------|------|----------|--------|---------|
| Peak#         | Ret. Time | Name | Area     | Height | Area%   |
| 1             | 11.457    |      | 9572832  | 447648 | 48.738  |
| 2             | 14.895    |      | 10068522 | 269159 | 51.262  |
| Total         |           |      | 19641353 | 716807 | 100.000 |



Benzhydryl 4-hydroxy-2-methylene-4-phenylhexanoate (**8k**).

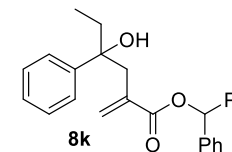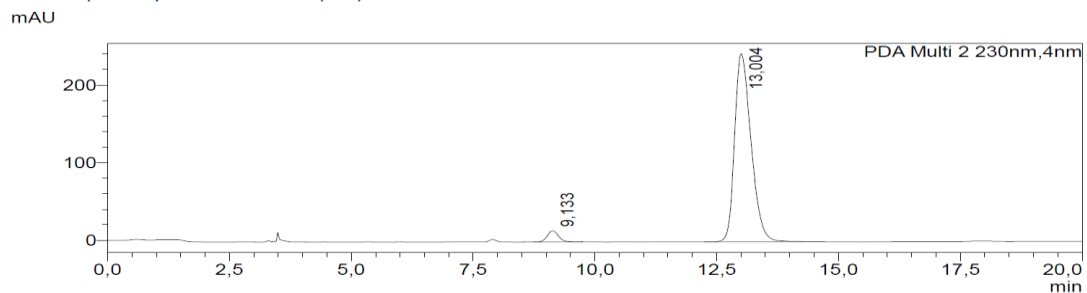

PDA Ch2 230nm

| Peak# | Ret. Time | Name | Area    | Height | Area%   |
|-------|-----------|------|---------|--------|---------|
| 1     | 9,133     |      | 228400  | 14390  | 3,861   |
| 2     | 13,004    |      | 5687530 | 241861 | 96,139  |
| Total |           |      | 5915930 | 256252 | 100,000 |

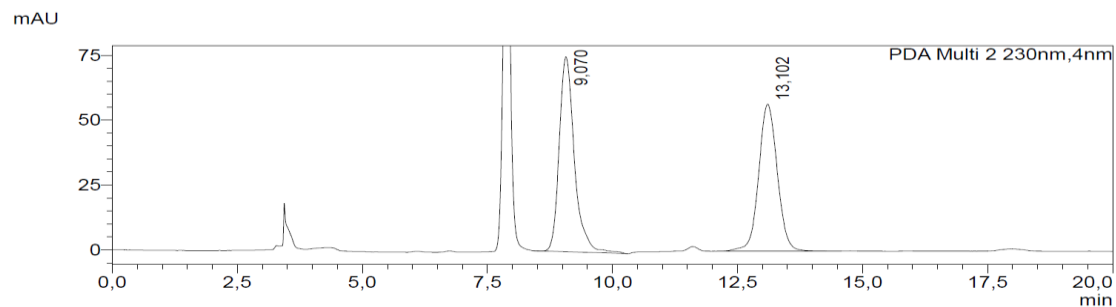

PDA Ch2 230nm

| Peak# | Ret. Time | Name | Area    | Height | Area%   |
|-------|-----------|------|---------|--------|---------|
| 1     | 9,070     |      | 1585320 | 75138  | 51,976  |
| 2     | 13,102    |      | 1464773 | 56576  | 48,024  |
| Total |           |      | 3050093 | 131714 | 100,000 |

Benzhydryl 4-hydroxy-2-methylene-4-phenylheptanoate (**8I**).

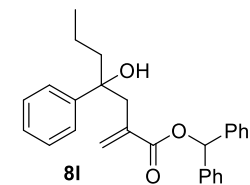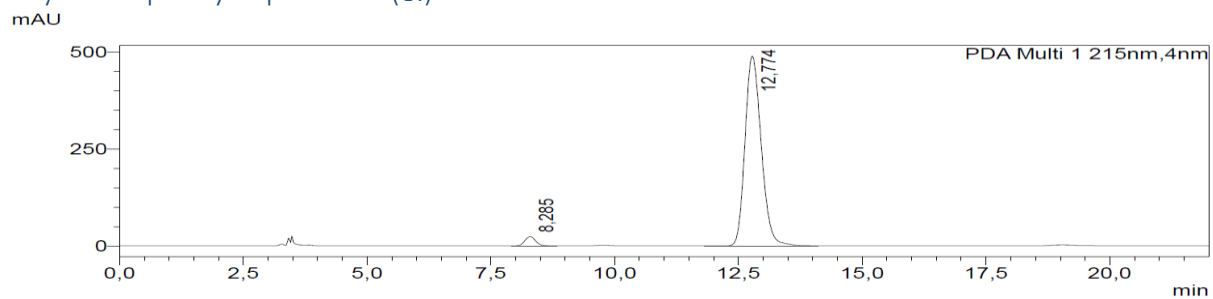

| PDA Ch1 215nm |           |      |          |        |         |
|---------------|-----------|------|----------|--------|---------|
| Peak#         | Ret. Time | Name | Area     | Height | Area%   |
| 1             | 8,285     |      | 354474   | 23706  | 3,076   |
| 2             | 12,774    |      | 11168767 | 489105 | 96,924  |
| Total         |           |      | 11523240 | 512811 | 100,000 |

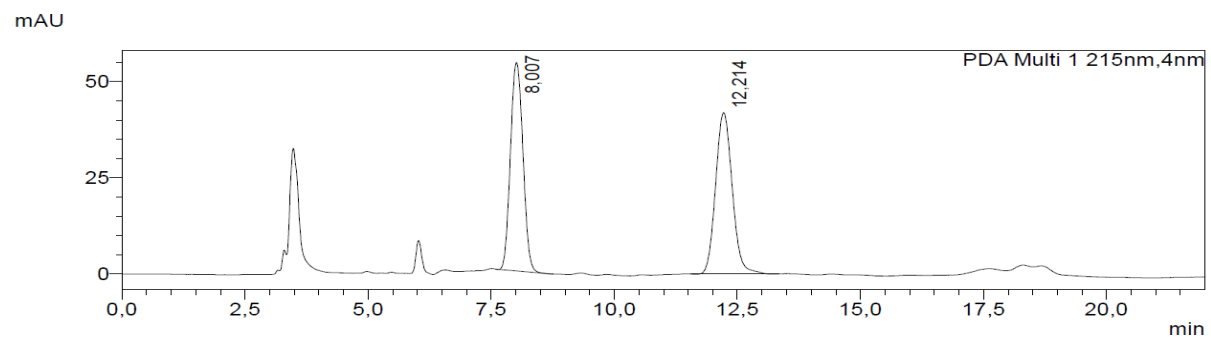

| PDA Ch1 215nm |           |      |         |        |         |
|---------------|-----------|------|---------|--------|---------|
| Peak#         | Ret. Time | Name | Area    | Height | Area%   |
| 1             | 8,007     |      | 956715  | 54167  | 49,276  |
| 2             | 12,214    |      | 984825  | 41885  | 50,724  |
| Total         |           |      | 1941540 | 96052  | 100,000 |

Benzhydryl 2-[(1-hydroxy-1,2,3,4-tetrahydronaphthalen-1-yl)methyl]acrylate (**8m**).

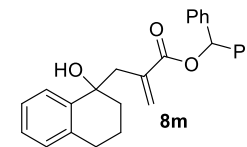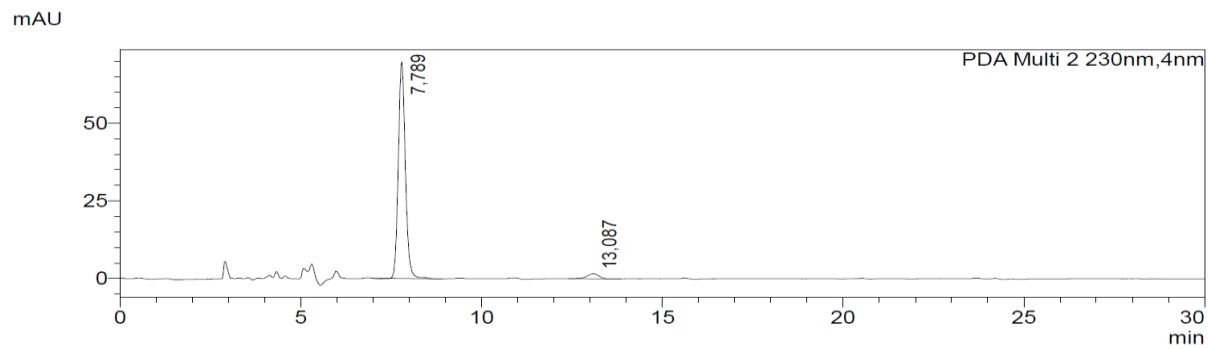

| PDA Ch2 230nm |           |      |        |        |         |
|---------------|-----------|------|--------|--------|---------|
| Peak#         | Ret. Time | Name | Area   | Height | Area%   |
| 1             | 7.789     |      | 943038 | 69718  | 96.422  |
| 2             | 13.087    |      | 34995  | 1616   | 3.578   |
| Total         |           |      | 978034 | 71334  | 100.000 |

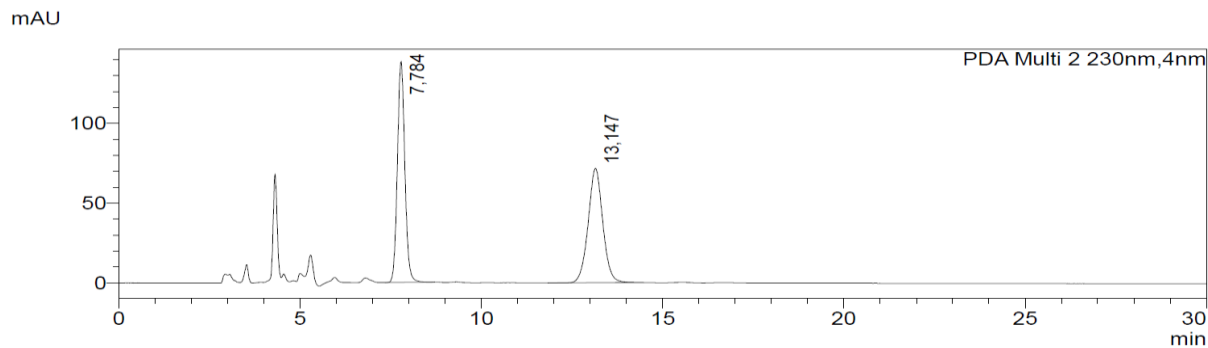

| PDA Ch2 230nm |           |      |         |        |         |
|---------------|-----------|------|---------|--------|---------|
| Peak#         | Ret. Time | Name | Area    | Height | Area%   |
| 1             | 7.784     |      | 1972749 | 138172 | 49.609  |
| 2             | 13.147    |      | 2003866 | 71551  | 50.391  |
| Total         |           |      | 3976616 | 209723 | 100.000 |

Benzhydryl 2-[(4-hydroxychroman-4-yl)methyl]acrylate (**8n**).

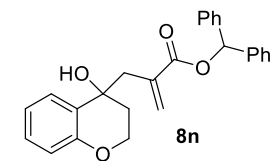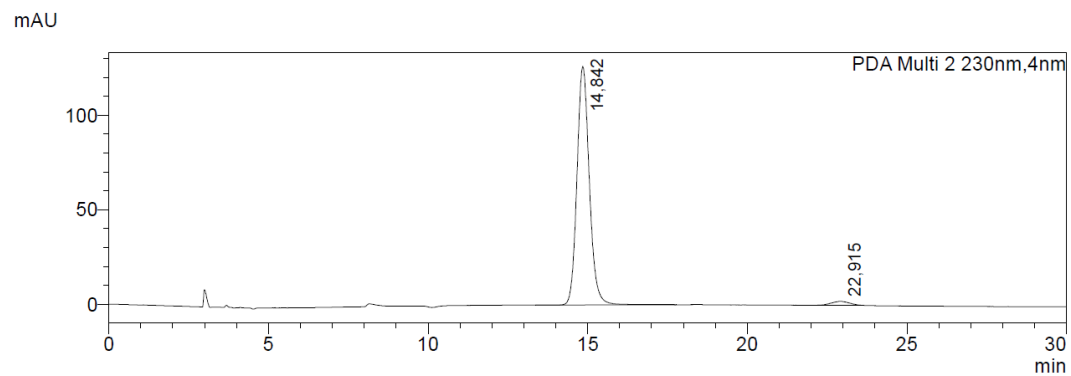

| PDA Ch2 230nm |           |      |         |        |         |
|---------------|-----------|------|---------|--------|---------|
| Peak#         | Ret. Time | Name | Area    | Height | Area%   |
| 1             | 14.842    |      | 3396741 | 126149 | 97.552  |
| 2             | 22.915    |      | 85228   | 2103   | 2.448   |
| Total         |           |      | 3481969 | 128251 | 100.000 |

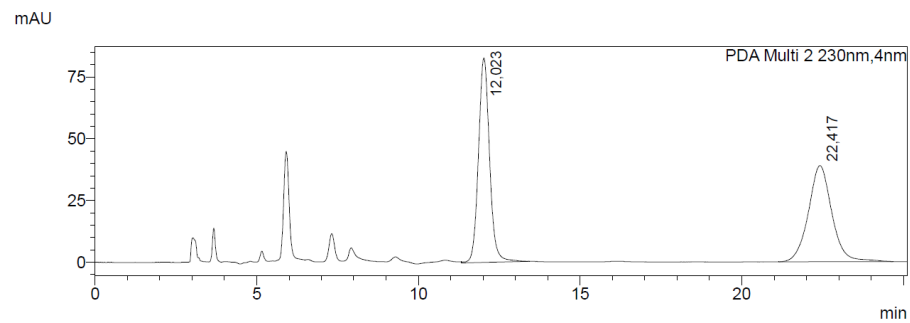

| PDA Ch2 230nm |           |      |         |        |         |
|---------------|-----------|------|---------|--------|---------|
| Peak#         | Ret. Time | Name | Area    | Height | Area%   |
| 1             | 12.023    |      | 1972790 | 82764  | 50.164  |
| 2             | 22.417    |      | 1959903 | 38891  | 49.836  |
| Total         |           |      | 3932693 | 121655 | 100.000 |

Benzhydryl 2-[(6-chloro-4-hydroxychroman-4-yl)methyl]acrylate (**8o**).

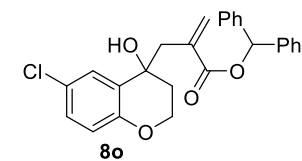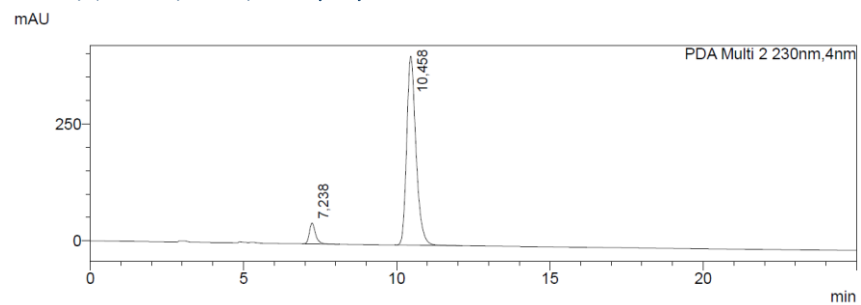

| PDA Ch2 230nm |           |      |         |        |         |
|---------------|-----------|------|---------|--------|---------|
| Peak#         | Ret. Time | Name | Area    | Height | Area%   |
| 1             | 7.238     |      | 625368  | 44628  | 6.832   |
| 2             | 10.458    |      | 8528554 | 403699 | 93.168  |
| Total         |           |      | 9153922 | 448328 | 100.000 |

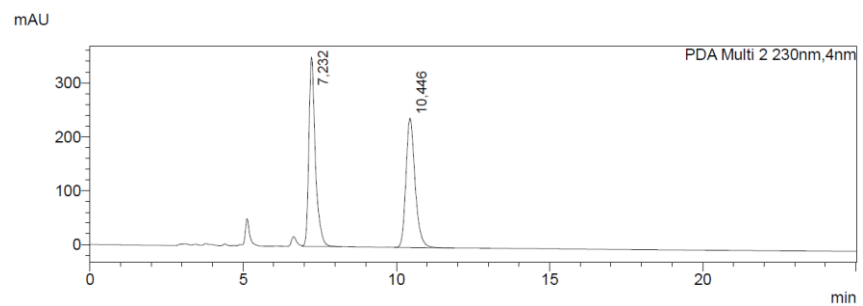

| PDA Ch2 230nm |           |      |          |        |         |
|---------------|-----------|------|----------|--------|---------|
| Peak#         | Ret. Time | Name | Area     | Height | Area%   |
| 1             | 7.232     |      | 5181167  | 351625 | 51.027  |
| 2             | 10.446    |      | 4972605  | 240016 | 48.973  |
| Total         |           |      | 10153772 | 591641 | 100.000 |

Benzhydryl (*E*)-4-hydroxy-4-methyl-2-methylene-6-phenylhex-5-enoate (**8p**).

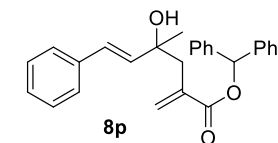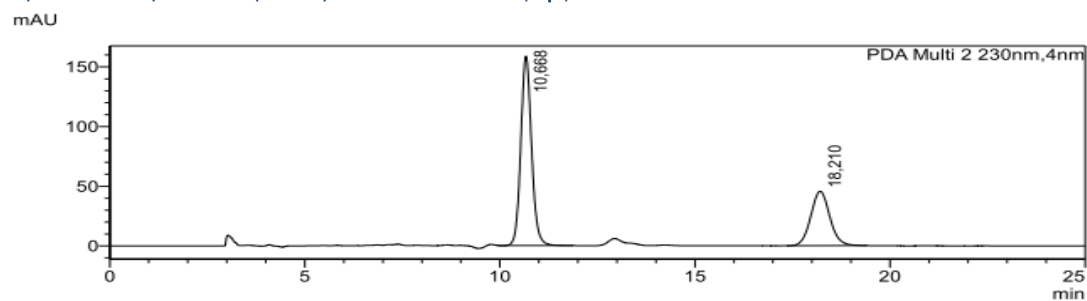

| PDA Ch2 230nm |           |      |         |        |         |
|---------------|-----------|------|---------|--------|---------|
| Peak#         | Ret. Time | Name | Area    | Height | Area%   |
| 1             | 10,668    |      | 3040225 | 158258 | 66,347  |
| 2             | 18,210    |      | 1542086 | 45566  | 33,653  |
| Total         |           |      | 4582311 | 203824 | 100,000 |

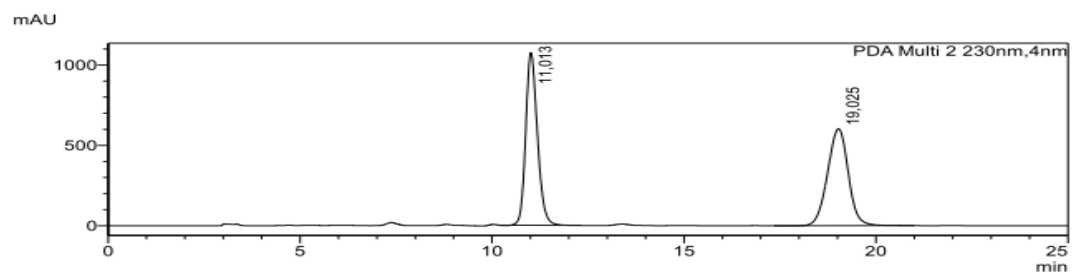

| PDA Ch2 230nm |           |      |          |         |         |
|---------------|-----------|------|----------|---------|---------|
| Peak#         | Ret. Time | Name | Area     | Height  | Area%   |
| 1             | 11,013    |      | 22717518 | 1072154 | 50,085  |
| 2             | 19,025    |      | 22640822 | 602618  | 49,915  |
| Total         |           |      | 45358340 | 1674772 | 100,000 |

Benzhydryl 4-(4-bromophenyl)-4-hydroxy-3-methyl-2-methylenepentanoate (**8q**).

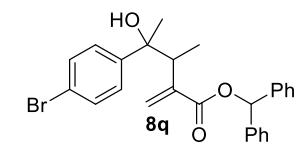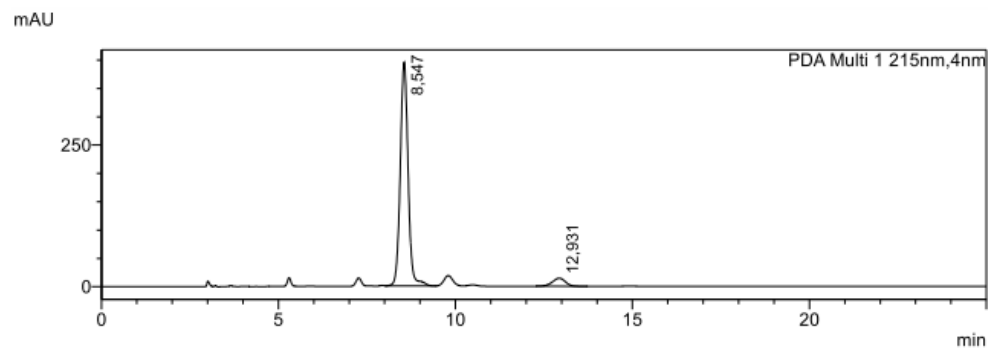

<Peak Table>

| Peak# | Ret. Time | Name | Area    | Height | Area%   |
|-------|-----------|------|---------|--------|---------|
| 1     | 8.547     |      | 6072079 | 394512 | 94.309  |
| 2     | 12.931    |      | 366421  | 14315  | 5.691   |
| Total |           |      | 6438501 | 408827 | 100,000 |

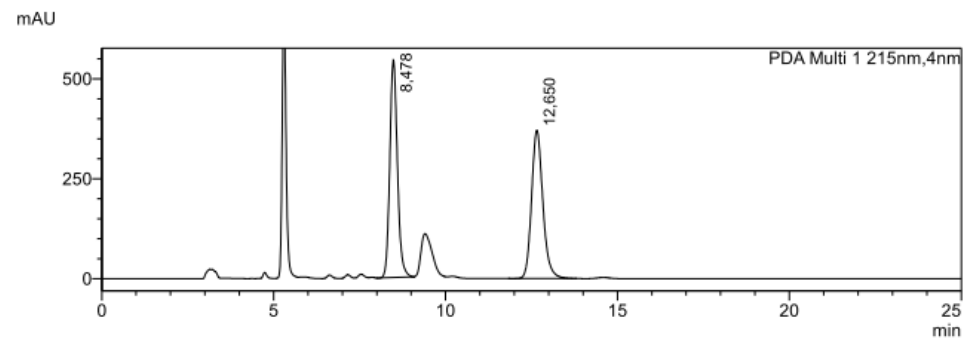

| Peak# | Ret. Time | Name | Area     | Height | Area%   |
|-------|-----------|------|----------|--------|---------|
| 1     | 8.478     |      | 8378765  | 543005 | 49.661  |
| 2     | 12.650    |      | 8493030  | 370275 | 50.339  |
| Total |           |      | 16871795 | 913280 | 100,000 |

## Determination of Absolute Configuration.

*5-Methyl-3-methylene-5-phenyldihydrofuran-2(3H)-one (10b)*.

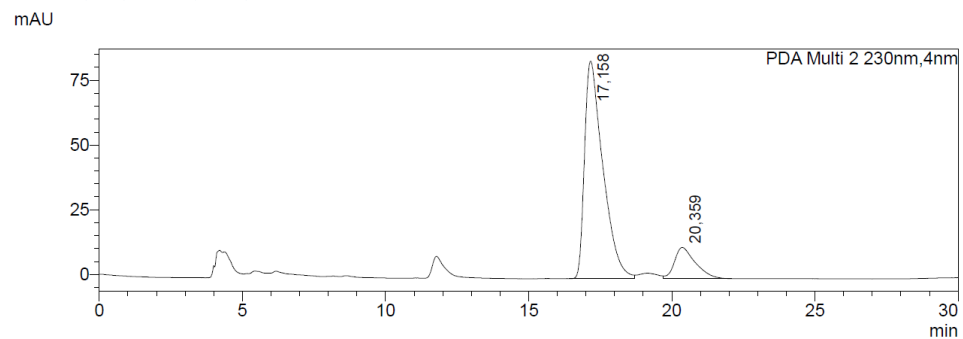

| PDA Ch2 230nm |           |      |         |        |         |
|---------------|-----------|------|---------|--------|---------|
| Peak#         | Ret. Time | Name | Area    | Height | Area%   |
| 1             | 17.158    |      | 3744938 | 84045  | 85.968  |
| 2             | 20.359    |      | 611287  | 12039  | 14.032  |
| Total         |           |      | 4356225 | 96083  | 100.000 |

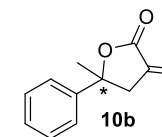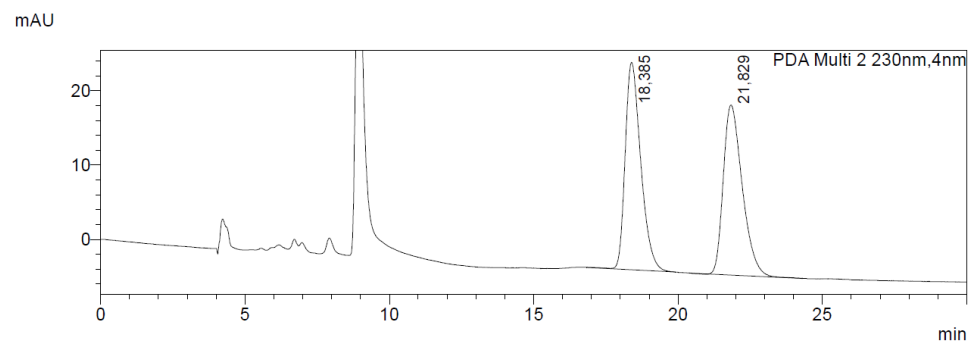

| PDA Ch2 230nm |           |      |         |        |         |
|---------------|-----------|------|---------|--------|---------|
| Peak#         | Ret. Time | Name | Area    | Height | Area%   |
| 1             | 18.385    |      | 1046694 | 27899  | 50.021  |
| 2             | 21.829    |      | 1045824 | 22903  | 49.979  |
| Total         |           |      | 2092518 | 50802  | 100.000 |



*(R)*-6-chloro-4'-methylene-3',4'-dihydro-5'H-spiro[chromane-4,2'-furan]-5'-one (**10o**).

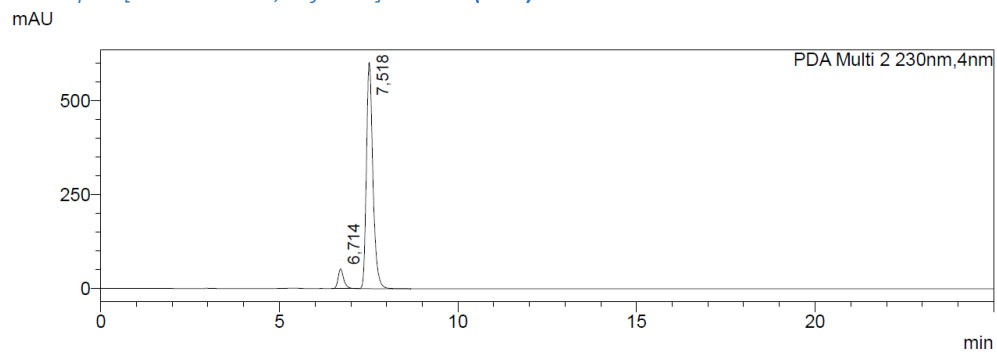

| Peak# | Ret. Time | Name | Area    | Height | Area%   |
|-------|-----------|------|---------|--------|---------|
| 1     | 6,714     |      | 576451  | 52125  | 7.028   |
| 2     | 7,518     |      | 7625795 | 603707 | 92.972  |
| Total |           |      | 8202245 | 655832 | 100,000 |

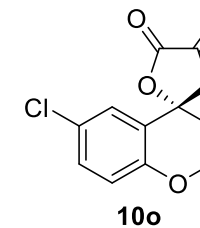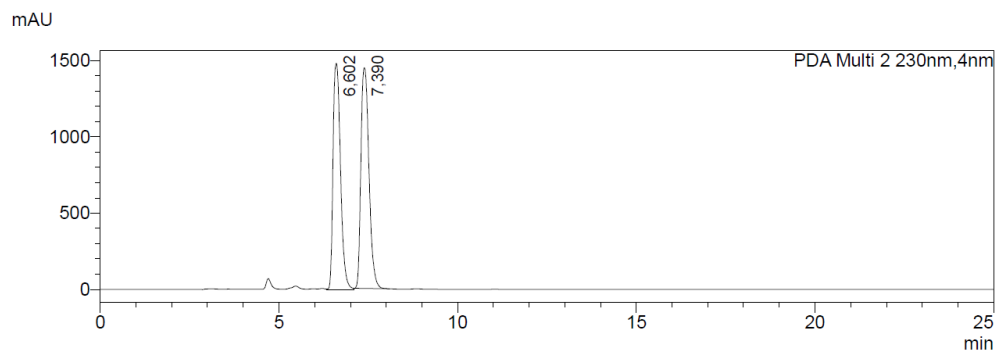

| Peak# | Ret. Time | Name | Area     | Height  | Area%   |
|-------|-----------|------|----------|---------|---------|
| 1     | 6,602     |      | 21477900 | 1484039 | 48.715  |
| 2     | 7,390     |      | 22610871 | 1447664 | 51.285  |
| Total |           |      | 44088771 | 2931703 | 100,000 |

HPLC chromatograms of single crystals from X-Ray Analysis.

*rac*-**10o**-Cry1 [(*S*)-enantiomer crystallized with ee = 50%].

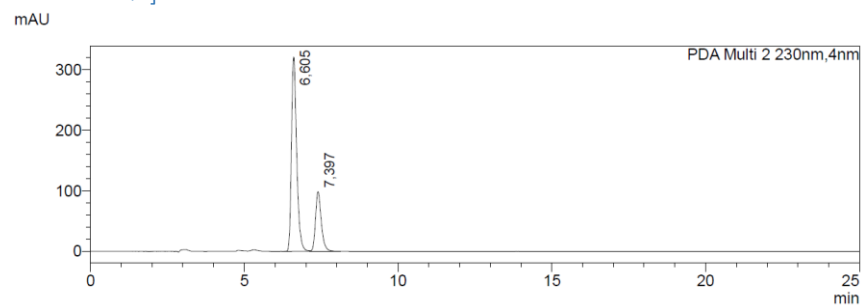

| Peak# | Ret. Time | Name | Area    | Height | Area%   |
|-------|-----------|------|---------|--------|---------|
| 1     | 6.605     |      | 3776463 | 321468 | 74.712  |
| 2     | 7.397     |      | 1278200 | 98175  | 25.288  |
| Total |           |      | 5054663 | 419643 | 100.000 |

*rac*-**10o**-Cry2 [(*S*)-enantiomer crystallized with ee = 98%].

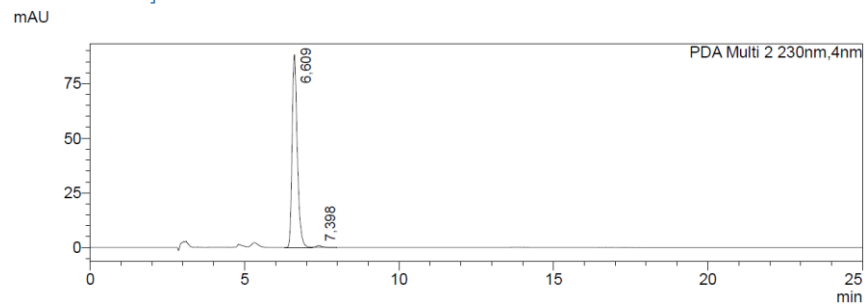

| Peak# | Ret. Time | Name | Area    | Height | Area%   |
|-------|-----------|------|---------|--------|---------|
| 1     | 6.609     |      | 1034765 | 88196  | 99.093  |
| 2     | 7.398     |      | 9473    | 783    | 0.907   |
| Total |           |      | 1044238 | 88979  | 100.000 |

(*R*)-**10o**-Cry1 [(*R*)-enantiomer crystallized with ee = > 99%].

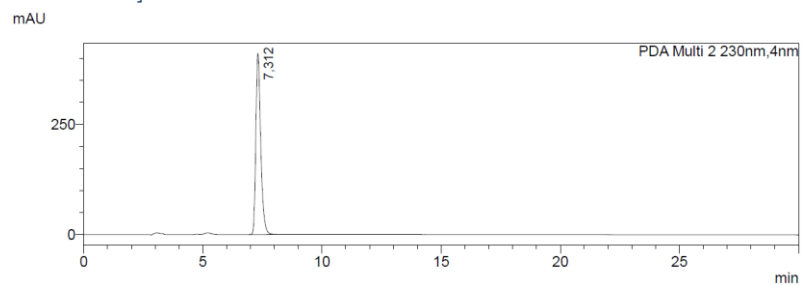

| PDA Ch2 230nm |           |      |         |        |         |
|---------------|-----------|------|---------|--------|---------|
| Peak#         | Ret. Time | Name | Area    | Height | Area%   |
| 1             | 7.312     |      | 5872117 | 411411 | 100.000 |
| Total         |           |      | 5872117 | 411411 | 100.000 |

5-(4-bromophenyl)-4,5-dimethyl-3-methylenedihydrofuran-2(3H)-one (**10q**).

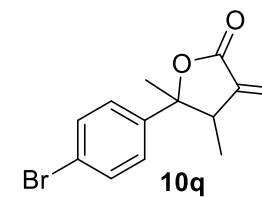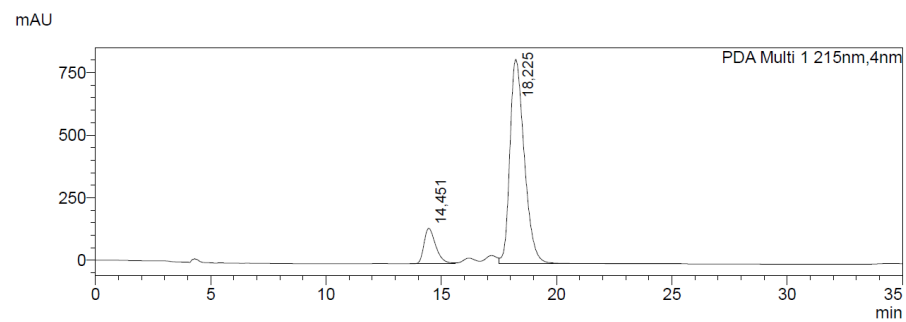

| Peak# | Ret. Time | Name | Area     | Height | Area%   |
|-------|-----------|------|----------|--------|---------|
| 1     | 14.451    |      | 5083514  | 142039 | 12.421  |
| 2     | 18.225    |      | 35842772 | 817335 | 87.579  |
| Total |           |      | 40926285 | 959374 | 100.000 |

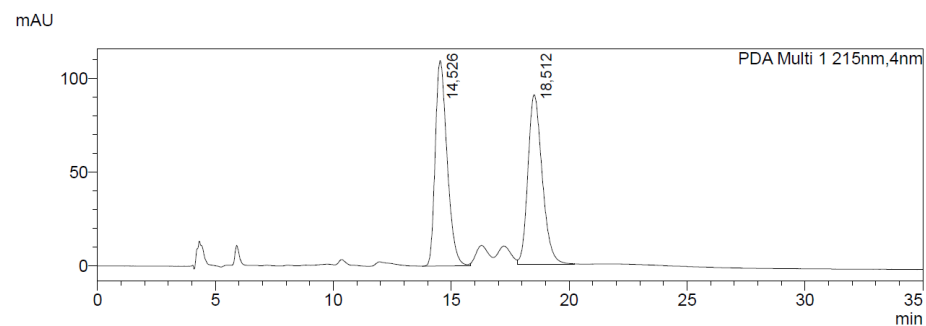

| Peak# | Ret. Time | Name | Area    | Height | Area%   |
|-------|-----------|------|---------|--------|---------|
| 1     | 14.526    |      | 3831006 | 109545 | 49.976  |
| 2     | 18.512    |      | 3834741 | 90504  | 50.024  |
| Total |           |      | 7665747 | 200049 | 100.000 |

4-[(4-bromophenyl)(hydroxy)methyl]-3-methylenedihydrofuran-2(3H)-one (**19**).

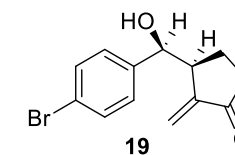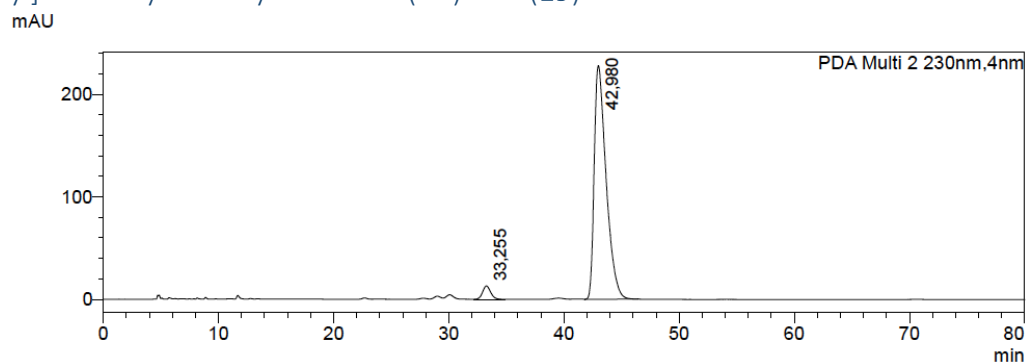

| PDA Ch2 230nm |           |      |          |        |         |
|---------------|-----------|------|----------|--------|---------|
| Peak#         | Ret. Time | Name | Area     | Height | Area%   |
| 1             | 33,255    |      | 627113   | 12995  | 3,684   |
| 2             | 42,980    |      | 16393222 | 228005 | 96,316  |
| Total         |           |      | 17020335 | 241000 | 100,000 |

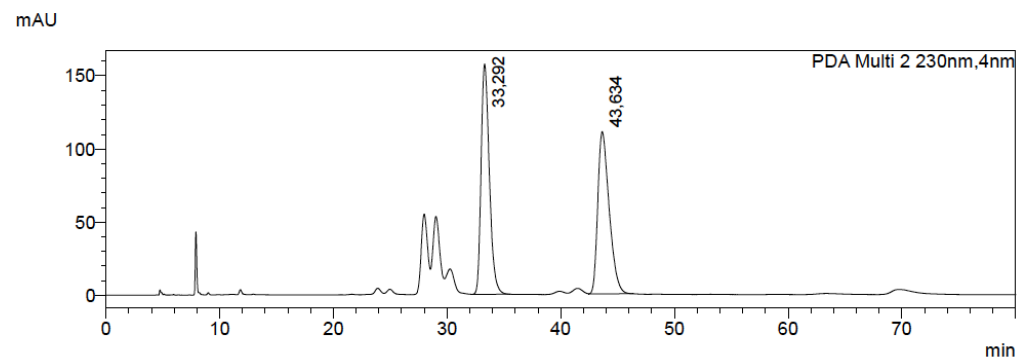

| PDA Ch2 230nm |           |      |          |        |         |
|---------------|-----------|------|----------|--------|---------|
| Peak#         | Ret. Time | Name | Area     | Height | Area%   |
| 1             | 33,292    |      | 7908705  | 157389 | 50,645  |
| 2             | 43,634    |      | 7707161  | 110835 | 49,355  |
| Total         |           |      | 15615866 | 268224 | 100,000 |

4-[1-(4-bromophenyl)-1-hydroxyethyl]-3-methylenedihydrofuran-2(3H)-one (**20**).

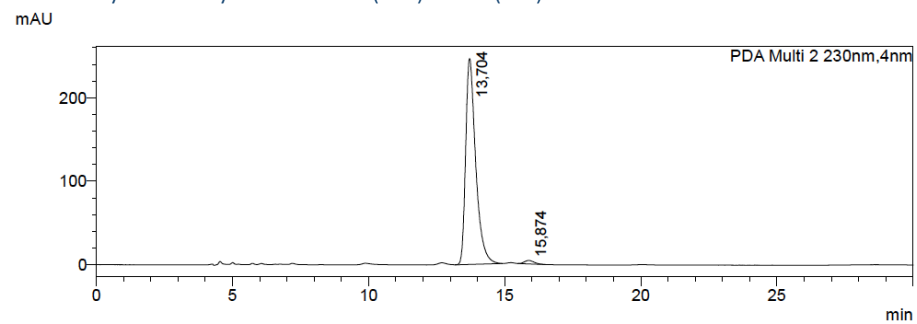

| Peak# | Ret. Time | Name | Area    | Height | Area%   |
|-------|-----------|------|---------|--------|---------|
| 1     | 13.704    |      | 6307761 | 246845 | 98.398  |
| 2     | 15.874    |      | 102701  | 4087   | 1.602   |
| Total |           |      | 6410462 | 250932 | 100.000 |

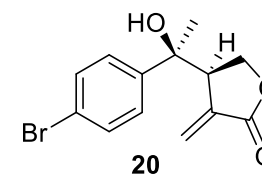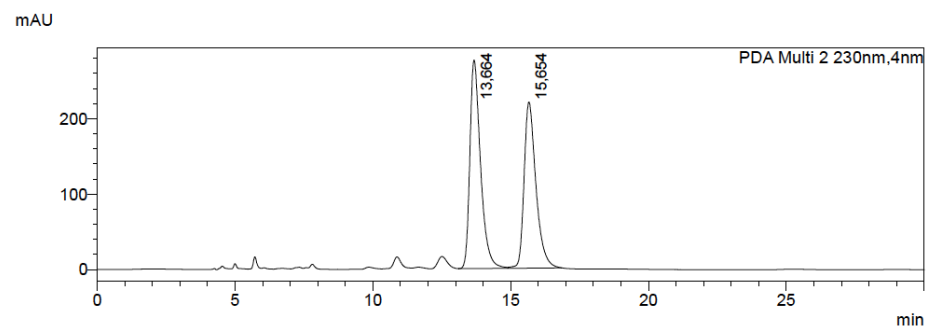

| Peak# | Ret. Time | Name | Area     | Height | Area%   |
|-------|-----------|------|----------|--------|---------|
| 1     | 13.664    |      | 7416671  | 276554 | 53.029  |
| 2     | 15.654    |      | 6569417  | 220360 | 46.971  |
| Total |           |      | 13986088 | 496915 | 100.000 |

*N,N*-dibenzyl-4-hydroxy-2-methylene-4-phenylpentanamide (**8r**).

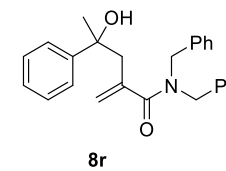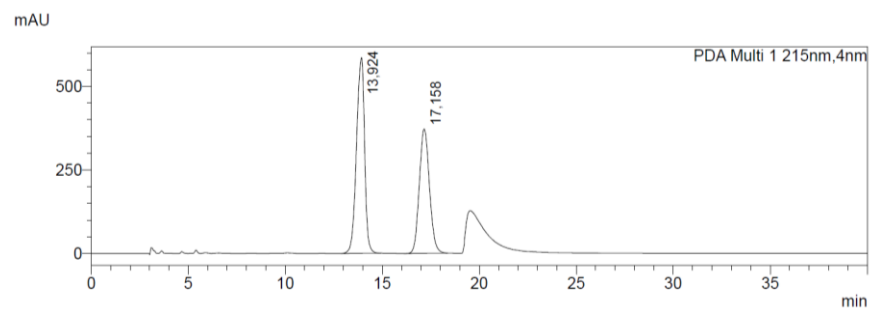

| Peak# | Ret. Time | Name | Area     | Height | Area%   |
|-------|-----------|------|----------|--------|---------|
| 1     | 13.924    |      | 17046867 | 585452 | 55.680  |
| 2     | 17.158    |      | 13569086 | 372000 | 44.320  |
| Total |           |      | 30615952 | 957452 | 100.000 |

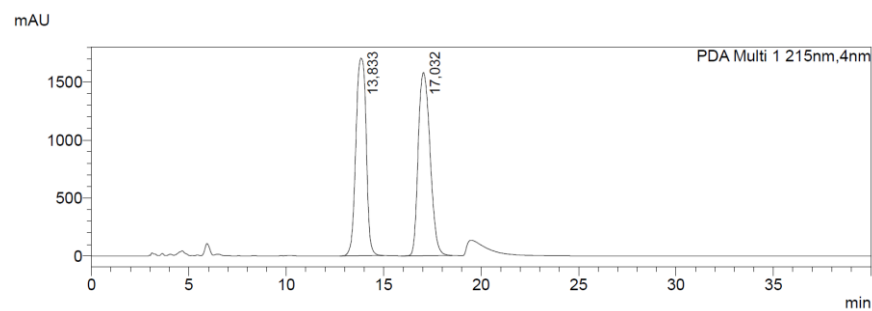

| Peak# | Ret. Time | Name | Area      | Height  | Area%   |
|-------|-----------|------|-----------|---------|---------|
| 1     | 13.833    |      | 62582180  | 1703936 | 48.343  |
| 2     | 17.032    |      | 66871423  | 1579411 | 51.657  |
| Total |           |      | 129453603 | 3283347 | 100.000 |

## References.

1. Ishchenko, A. Y.; Yanik, S.; Rusanov, E. B.; Komarov, I. V.; Kirby, A. J., *Synthesis* **2015**, *47*, 367-367.
2. Jain, P.; Antilla, J. C., *J. Am. Chem. Soc.* **2010**, *132*, 11884-11886.
3. Suzuki, T.; Atsumi, J.-i.; Sengoku, T.; Takahashi, M.; Yoda, H., *J. Organomet. Chem.* **2010**, *695*, 128-136.
4. Boldrini, G. P.; Lodi, L.; Tagliavini, E.; Tarasco, C.; Trombini, C.; Umani-Ronchi, A., *J. Org. Chem.* **1987**, *52*, 5447-5452.
5. Eliel, E. L.; Bai, X.; Ohwa, M., *J. Chin. Chem. Soc.* **2000**, *47*, 63-70.
6. Garnier, J. M.; Robin, S.; Rousseau, G., *Eur. J. Org. Chem.* **2007**, *2007*, 3281-3291.
7. Sheldrick, G. M., *Acta Cryst.* **2008**, *A64*, 112-122.
8. Sheldrick, G. M., *Acta Cryst.* **2015**, *C71*, 3-8.
9. Flack, H., *Acta Cryst. A* **1983**, *39*, 876-881.
10. Johnson, C. K.; *ORTEP. Report ORNL-3794*, Oak Ridge National Laboratory: Tennessee, USA, **1965**.
11. Fuchs, M.; Schober, M.; Orthaber, A.; Faber, K., *Advanced Synthesis & Catalysis* **2013**, *355*, 2499-2505.
